# Supplementary material for: A novel human pluripotent stem cell gene activation system identifies IGFBP2 as a mediator in the production of haematopoietic progenitors in vitro
Source: eLife. 2024 Dec 23;13:RP94884. doi: 10.7554/eLife.94884 (PMC11666236; doi:10.7554/eLife.94884)
Supplement: Figure 2—figure supplement 1—source data 1. — Each tab is labelled to uniquely refer to a specific panel. [file elife-94884-fig2-figsupp1-data1.xlsx]

## Sheet: Fig 2 FS - B
DOX	RUNX1C exp
0	0.509348	0.549335	1.94132
0.1	15.1795	15.9244	24.6708
1	18.1223	26.6276	16.1642
10	26.4462	28.687	12.068
100	16.6717	26.3394	40.878
1000	67.3164	122.426	84.3528

## Sheet: Fig 2 FS - E
DOX	%mCherry
10	1.15	0.96	0.89
100	8.78	10.4	11.9
1000	42	43.2	42.7

## Sheet: Fig 2 FS - F
EV +DOX 1000ng/ml	g4 -DOX	DOX 10 ng/ml	DOX 100 ng/ml	DOX 1000 ng/ml
0.63	0.6	6	5.04	5.43
		2.33	5.6	6.31
		6.18	6.15	6.19

## Sheet: Fig 2 FS - G
DOX 10 ng/ml	DOX 100 ng/ml	DOX 1000 ng/ml
178	197	242
157	200	249
164	226	219
196	252	273
223	240	267
