# Supplementary material for: A novel human pluripotent stem cell gene activation system identifies IGFBP2 as a mediator in the production of haematopoietic progenitors in vitro
Source: eLife. 2024 Dec 23;13:RP94884. doi: 10.7554/eLife.94884 (PMC11666236; doi:10.7554/eLife.94884)
Supplement: Figure 2—figure supplement 2—source data 1. — Each tab is labelled to uniquely refer to a specific panel. [file elife-94884-fig2-figsupp2-data1.xlsx]

## Sheet: Fig 2 FS - F
Viability
CTR	SB
86.2	84.62
77.27	92
89.66	83.33
87.01	86.49
85.71	94.64
87.5	92

## Sheet: Fig 2 FS - G
Cell count
CTR	SB
780000	600000
510000	690000
750000	660000
1000000	480000
540000	795000
735000	690000
