# Supplementary material for: A novel human pluripotent stem cell gene activation system identifies IGFBP2 as a mediator in the production of haematopoietic progenitors in vitro
Source: eLife. 2024 Dec 23;13:RP94884. doi: 10.7554/eLife.94884 (PMC11666236; doi:10.7554/eLife.94884)
Supplement: Figure 2—source data 1. — Each tab is labelled to uniquely refer to a specific panel. [file elife-94884-fig2-data1.xlsx]

## Sheet: Fig 2 - F
	Old Backbone			10x Capturing
EV	0.94	1	1.06	0.748503	1.4252	0.826299
RUNX1g1	527.7	633.53	553.33	698.367	750.707	685.783
RUNX1g2	271.14	329.06	298.55	267.074	283.382	225.764
RUNX1g3	231.49	224.77	226.78	213.906	289.106	258.951
RUNX1g4	64.48	74.96	62.98	57.2933	75.9369	42.0035

## Sheet: Fig 2 - G
Fold activation
0.748
1.425
0.826
1.221
1.313
1.199
0.891
0.945
0.753
0.939
1.269
1.137
0.849
1.125
0.622
