# Supplementary material for: A novel human pluripotent stem cell gene activation system identifies IGFBP2 as a mediator in the production of haematopoietic progenitors in vitro
Source: eLife. 2024 Dec 23;13:RP94884. doi: 10.7554/eLife.94884 (PMC11666236; doi:10.7554/eLife.94884)
Supplement: Figure 3—figure supplement 1—source data 1. — Each tab is labelled to uniquely refer to a specific panel. [file elife-94884-fig3-figsupp1-data1.xlsx]

## Sheet: Fig 3 FS - D
	iSAM_NT							iSAM_AGM
-DOX	27.4	7.62	27.6	41.9	26.6	11		29.5	4.44	13	34.7	8.8	14.5	10.2
+DOX	41.9	11.8	57.5	54.5	45.5	16.5		61.3	18.9	45.7	48.1	47.8	22.8	14.2

## Sheet: Fig 3 - FS E
	G0/G1											G2/M/S
CTR	80.1	81.1	76	62.9153	64.9946	64.764	69.747	67.5705	65.5508	67.3662		19.56	18.52	23.52	37.0847	35.0055	35.236	30.253	32.4295	34.4492	32.6338
+ IGFBP2	75.4	76.6	69.1	69	70.4241	66.7034	67.5589	67.4121	65.6748	68.1378		24.19	23.03	30.2	30	29.5759	33.2966	32.4411	32.5879	34.3252	31.8622

## Sheet: Fig 3- SF F
mCherry+%
iSAM_NT + DOX	iSAM_AGM + DOX
51.3	44.5
75.1	78.7
68.2	67.2
62.9	63.2
71	63.8
