# Supplementary material for: A novel human pluripotent stem cell gene activation system identifies IGFBP2 as a mediator in the production of haematopoietic progenitors in vitro
Source: eLife. 2024 Dec 23;13:RP94884. doi: 10.7554/eLife.94884 (PMC11666236; doi:10.7554/eLife.94884)
Supplement: Figure 3—source data 1. — Each tab is labelled to uniquely refer to a specific panel. [file elife-94884-fig3-data1.xlsx]

## Sheet: Fig 3 - G
iSAM_NT	iSAM_AGM
1.5292	2.07797
1.54856	4.25676
2.08333	3.51539
1.30072	1.38617
1.71053	5.43182
1.5	1.57241
	1.39216

## Sheet: Fig 3 - H
	iSAM_NT - DOX		iSAM_NT + DOX		iSAM_AGM - DOX		iSAM_AGM + DOX
CFU-E	0	0	2	1	0	0	4	4
CFU-G	1	1	0	1	1	1	1	0
CFU-GM	2	1	0	1	1	2	5	5
CFU-M	0	1	2	5	14	7	7	6
CFU-Mixed	0	0	0	0	0	0	1	1
