# Supplementary material for: A novel human pluripotent stem cell gene activation system identifies IGFBP2 as a mediator in the production of haematopoietic progenitors in vitro
Source: eLife. 2024 Dec 23;13:RP94884. doi: 10.7554/eLife.94884 (PMC11666236; doi:10.7554/eLife.94884)
Supplement: Figure 4—source data 1. — Each tab is labelled to uniquely refer to a specific panel. [file elife-94884-fig4-data1.xlsx]

## Sheet: Fig 4 - B
	CFU-E				CFU-G				CFU-GM				CFU-M				CFU-Mixed
55 CTR	3	3	3		1	0	1		6	10	7		7	15	18		1	0	0
55 IGFBP2	9	4	10	7	4	3	3	3	15	13	16	19	25	22	11	25	3	1	3	6

## Sheet: Fig 4 - C
CTR		IGFBP2
DLL4-	DLL4+	DLL4-	DLL4+
49	51	49.5	50.5
45.3	54.7	42.3	57.7
49	51	57.6	42.2
69.5	30.5	62.7	37.3

## Sheet: Fig 4 - D
CTR	IGFBP2	CTR	IGFBP2	CTR	IGFBP2
CD34+	CD34+	CD43+	CD43+	CD45+	CD45+
0.716658	2.59829	0.660832	3.20366	0.773402	2.15141
0.771291	2.78629	0.946542	4.17483	0.705882	2.53197
1.51205	2.52919	1.39263	3.48171	1.52072	1.98721
1	2.37172	1	2.28524	1	2.20358
	2.77672		2.95743		2.85984
