# Supplementary material for: A novel human pluripotent stem cell gene activation system identifies IGFBP2 as a mediator in the production of haematopoietic progenitors in vitro
Source: eLife. 2024 Dec 23;13:RP94884. doi: 10.7554/eLife.94884 (PMC11666236; doi:10.7554/eLife.94884)
Supplement: Figure 5—figure supplement 1—source data 1. — Each tab is labelled to uniquely refer to a specific panel. [file elife-94884-fig5-figsupp1-data1.xlsx]

## Sheet: Fig 5 FS - C
CD34+		CD43+		CD45+		CD41+		CD144+		CD235a+
CTR	IGFBP2	CTR	IGFBP2	CTR	IGFBP2	CTR	IGFBP2	CTR	IGFBP2	CTR	IGFBP2
4.24	3.36	84.5	89.5	4.79	2.91	15.4	15.1	19.8	20.3	3.34	2.14
3.23	2.81	85.7	91.1	3.1	2.68	12.5	13.9	20	26.6	1.29	2.49
4.31	3.02	85.7	89.5	4.54	2.49	11.9	14.6	18.5	26.9	2.02	1.93
7.71	4.3	74.7	89.5		4.18	13.3	12.3	21.9	26.4	2.03	1.58
	7.72		79.7			10.9	11.2	20.1	23.2	8.52	8.81
						10.2	10.3	25.7	31.5	4.87	1.21
						12.8	13.1	18.8	22.9	4.63	3.39

## Sheet: Fig 5 SF - E
	CFU-E						CFU-G						CFU-M						CFU-GM						CFU-MIX
DLL4+	12	0	1	4	7	1	17	26	18	37	36	51	44	44	42	76	75	76	10	15	4	53	10	36	0	0	0	0	0	0
DLL4-	58	44	228				102	132	70				108	124	76				80	116	96				42	22	40
