# Supplementary material for: A novel human pluripotent stem cell gene activation system identifies IGFBP2 as a mediator in the production of haematopoietic progenitors in vitro
Source: eLife. 2024 Dec 23;13:RP94884. doi: 10.7554/eLife.94884 (PMC11666236; doi:10.7554/eLife.94884)
Supplement: Figure 5—source data 1. — Each tab is labelled to uniquely refer to a specific panel. [file elife-94884-fig5-data1.xlsx]

## Sheet: Fig 5 - E
Time	ECAR - CTR								ECAR - IGFBP2								OCR - CTR								OCR - IGFBP2
0:01:30	3.97	2.97	12.22	10.81	10.28	13.21	11.72	13.76	1.89	1.77	10.65	6.26	8.74	9.51	7.51	8.36	8,19*	7*	21.04	30.51	28.69	30.18	38.29	41.8	3,67*	2,88*	24.77	17.87	20.44	31.69	30.42	28.02
0:08:00	4.06	2.54	10.61	9.78	9.23	13.54	11.27	13.24	1.63	1.67	9.54	5.76	7.94	9.46	7.4	8.78	14.79	11.81	18.96	26.89	25.91	31.31	36.27	39.08	9.07	8.46	24.06	16.46	19.09	29.85	28.28	26.3
0:15:00	4.21	2.84	10.25	9.6	9.33	14.27	11.92	13.68	1.53	1.55	9.7	5.94	8.09	9.89	8	8.55	13.7	11.83	16.13	24.61	23.79	30.07	35.13	38.16	9.63	7.98	21.42	16.05	17.59	29.11	27.12	29.12
0:21:00	6.37	4.32	14.62	14.61	13.12	18.97	14.13	15.64	2.7	3.08	12.72	8.67	12.37	11.66	9.53	12.43	8.42	8.68	8.87	12.6	13.41	17.75	31.34	32.67	6.95	5.63	10.79	8.43	8.86	25.53	18.17	17.96
0:28:00	6.17	4.81	15.56	15.42	12.91	22.43	17.33	19.86	3.1	3.29	13.58	8.51	12.61	13.73	13.05	15	8.36	8.54	8.22	11.48	11.61	14.99	25.66	26.3	5.87	6.06	10.2	8.11	7.07	20.03	12.8	15.79
0:34:00	6.31	4.54	15.56	15.73	13.28	24.11	19.98	22.58	2.63	2.79	13.67	8.58	12.94	15.99	14.41	16.02	7.94	7.89	9	12.16	12.88	14.7	23.41	23.06	5.27	4.66	10.96	8.19	8.07	17.14	12.79	16.14
0:41:00	5.9	4.7	15	16.59	16.08	23.59	25.8	25.44	2.66	2.76	14.35	8.75	12.57	18.73	13.56	15.89	5.78	5.74	6.4	9.27	9.89	11.78	15.05	14.51	4.24	3.61	8.99	7.04	6.31	12.04	9.74	14.52
0:47:00	6.42	4.98	15.28	16.47	16.01	23.95	26.35	27.36	2.79	3.11	14.15	8.48	13.22	19.36	15.03	16.74	6.11	6.1	6.96	8.89	9.52	9.62	13.44	12.92	4.04	4.17	7.63	5.48	6.6	11.25	8.98	12.92
0:54:00	5.91	4.12	15.46	16.81	16.46	24.84	27.47	28.23	2.38	2.96	14.32	8.85	14.05	19.8	15.97	16.7	5.36	5.05	6.31	9.43	9.38	11.33	14.23	13.18	3.39	2.41	7.36	6.17	6.62	11.43	9.43	14.15

## Sheet: Fig 5 - F
	GlycoATP								mitoATP
CTR	22.5407	14.3652	65.8237	56.5536	54.4143	79.3599	64.7142	75.3403	21.9461	10.1409	55.0792	83.9058	74.2217	80.8664	53.6825	67.8484
IGFBP2	7.07567	7.55313	57.2601	33.7721	47.5706	53.4109	40.1874	48.8728	18.2898	15.2488	70.2234	47.0017	60.7084	51.2467	77.1126	61.4947

## Sheet: Fig 5 - G
	CTR	IGFBP2
EXP1_1	0.9736	2.5849
EXP1_2	0.7059	2.01889
EXP3_1	0.836769	1.22639
EXP3_2	1.36401	1.27617
EXP4_1	1.01898	0.95948
EXP4_2	0.829532	1.91883
EXP5_3	0.900559	1.25826
