# Supplementary material for: A novel human pluripotent stem cell gene activation system identifies IGFBP2 as a mediator in the production of haematopoietic progenitors in vitro
Source: eLife. 2024 Dec 23;13:RP94884. doi: 10.7554/eLife.94884 (PMC11666236; doi:10.7554/eLife.94884)
Supplement: Supplementary file 1. [file elife-94884-supp1.xlsx]

## Sheet: gRNA sequence
Table 1
Gene name	Transcript ID	TSS Distance	Guide Sequence	Top/Bottom
ZNF124	NM_001243740	87	GTCTGAGGGGGCGGGGCCTG	b
ZNF124	NM_001243740	1	GGCACACCCGGAAGCCGCCT	t
ZNF124	NM_001243740	158	GGCTACAGCTCTTCTCCAAG	t
ZNF124	NM_001243740	126	CTCCCGCGCGTGTCTGAATG	t
ZNF124	NM_001243740	27	TTCTAGCGGAGCGCCGGATT	t
ZNF33A	NM_006954	40	GGAAAGGTAGTTTCCAGGTA	t
ZNF33A	NM_006954	61	GGCTGCTCGCCCGGCCTCAC	t
ZNF33A	NM_006954	105	CGCTAGGCAGTGGGCAGATG	b
ZNF33A	NM_006954	82	CACTTCTCTACCAATCCGAA	t
ZNF33A	NM_006954	11	CAGCATCAAGCTGTGCGCGT	t
SOX6	NM_001145819	50	TGGTTTTGTTTTGAAAGGAC	b
SOX6	NM_001145819	106	TTCCATCTGTGAGGGAACAA	b
SOX6	NM_001145811	78	CTACCCTTTTGCCTTTATAA	t
SOX6	NM_001145811	135	CCTCAGATCACCTTCAACTT	t
SOX6	NM_001145811	27	AAATGGCTCAATGTAACCAA	t
NR4A1	NM_001202233	62	TGGCCGAACTCGGCCCCCTG	t
NR4A1	NM_001202233	1	AGAAAGTGGTTCCGGGCCAG	b
NR4A1	NM_002135	125	GGGGGCGGGGCGAGGAGGGG	b
NR4A1	NM_002135	173	ACGCGGGGTTCCATTGACGC	b
NR4A1	NM_002135	36	TATGGCCAAAGCTCGACGGG	t
NFAT5	NM_001113178	73	CGCGCCTCCCCGCCCTCCGG	t
NFAT5	NM_001113178	161	CGGGAAAGGGCCCCGCTGCC	b
NFAT5	NM_001113178	5	CGCTGTGCCCCACGGGGGCG	t
NFAT5	NM_001113178	47	GGAGCGCGGAAGAGCCGTGG	b
NFAT5	NM_001113178	96	CCCATGTTGCTGCTGTTCCC	t
SMAD7	NM_005904	25	TCCCCAGGGAAGCGGCGGCC	b
SMAD7	NM_005904	93	CCGACATTCGGGAGCCACTG	b
SMAD7	NM_001190823	43	CAGGTGGTTCCCAAGGTCAA	t
SMAD7	NM_001190823	93	TGAGGGATGACAGAGCAACC	b
SMAD7	NM_001190822	22	GGCGTGCTATAAAGGCTGGA	b
SMAD7	NM_001190822	149	TTCATTTCCGGATCAACAAG	b
GATA2	NM_001145662	161	GCCCCCTCCCTGCGCGCTCC	t
GATA2	NM_001145662	49	GGCGCGCGGCGTTGATTGGC	b
GATA2	NM_001145661	30	GGGGAGGGGGCACCCCTCCC	t
GATA2	NM_001145661	93	GAGGCCGTGGAGACCCGGAC	t
GATA2	NM_032638	0	GCTGCCTCTCTCTCCCCCAC	t
GATA2	NM_032638	46	ACATCACTTTGCGGGGGGGC	t
TFDP2	NM_001178140	28	GAGGGCTTCACCCTTATGAG	b
TFDP2	NM_001178140	106	GTTTCAACATGAATTTTTGG	t
TFDP2	NM_001178138	96	CCTACTCTCAAAGGGAAGCC	b
TFDP2	NM_001178138	29	TGGCGCCGCTCCCCACGGAT	t
TFDP2	NM_006286	133	CAAAAGAAATTGAAAAGTGC	t
TFDP2	NM_006286	146	AAAGTGCAGGTCTTAGATGA	t
RUNX1T1	NM_001198632	118	CCGAGGCGGCACCCAGACCG	t
RUNX1T1	NM_001198632	28	AGGAAGGAGGGGTGGCCAGG	b
RUNX1T1	NM_001198632	74	CGGAGATTACCTTCTGGCAA	t
RUNX1T1	NM_175634	48	GAGTGAGCGAGGGCGGGCGA	b
RUNX1T1	NM_175634	95	GGGCGGCCGGGCGTCCGCCG	t
RUNX1T1	NM_175634	8	CAGGGAATTGCCACTGTCAC	t
NT	NA	NA	CGGAGGCTAAGCGTCGCAAC	NA

## Sheet: Marker genes' iSAM clusters
gene	p_val	avg_log2FC	pct.1	pct.2	p_val_adj	cluster
VIM	0	0.483229	0.999	0.995	0	Mixed_Endo
EIF1	2.3815e-216	0.366416	1	1	6.0614e-212	Mixed_Endo
PMP22	3.21656e-209	0.598978	0.865	0.706	8.18678e-205	Mixed_Endo
BRI3	2.23959e-180	0.402169	0.972	0.908	5.7002e-176	Mixed_Endo
HAPLN1	8.33936e-169	0.523912	0.787	0.554	2.12254e-164	Mixed_Endo
CSTB	2.4789e-150	0.337368	0.968	0.908	6.30929e-146	Mixed_Endo
NEAT1	3.0368e-148	0.63666	0.969	0.901	7.72926e-144	Mixed_Endo
CRABP2	1.02357e-142	0.428802	0.469	0.274	2.6052e-138	Mixed_Endo
S100A13	2.81271e-141	0.373228	0.918	0.813	7.15892e-137	Mixed_Endo
BGN	5.91377e-129	0.421268	0.73	0.57	1.50517e-124	Mixed_Endo
KDELR1	7.74889e-129	0.290093	0.987	0.963	1.97225e-124	Mixed_Endo
FTL	2.33367e-125	0.323255	1	1	5.93965e-121	Mixed_Endo
PPDPF	7.27084e-103	0.292505	0.973	0.946	1.85057e-98	Mixed_Endo
RALA	5.04289e-101	0.303659	0.927	0.843	1.28352e-96	Mixed_Endo
HLA-E	7.31399e-100	0.285093	0.96	0.894	1.86156e-95	Mixed_Endo
APOE	2.81759e-97	0.371427	0.872	0.77	7.17133e-93	Mixed_Endo
GUK1	2.11437e-96	0.269174	0.95	0.898	5.38149e-92	Mixed_Endo
OSTC	2.79717e-96	0.255323	0.965	0.941	7.11936e-92	Mixed_Endo
GAS5	3.71558e-96	0.277158	0.988	0.961	9.45689e-92	Mixed_Endo
TSC22D3	5.13285e-96	0.32356	0.803	0.689	1.30641e-91	Mixed_Endo
MALAT1	1.7404e-94	0.486717	0.998	0.996	4.42966e-90	Mixed_Endo
TIMP1	1.97674e-93	0.263015	0.999	0.989	5.0312e-89	Mixed_Endo
AKAP12	8.19452e-83	0.390364	0.704	0.584	2.08567e-78	Mixed_Endo
SSR3	7.49478e-79	0.262495	0.932	0.91	1.90757e-74	Mixed_Endo
RRAS	4.29493e-76	0.277122	0.727	0.621	1.09315e-71	Mixed_Endo
PROCR	6.3797e-76	0.273683	0.808	0.679	1.62376e-71	Mixed_Endo
KDELR2	4.52554e-67	0.262428	0.88	0.838	1.15184e-62	Mixed_Endo
SAT1	1.82437e-66	0.267266	0.783	0.69	4.64338e-62	Mixed_Endo
WSB1	1.50322e-65	0.280405	0.876	0.818	3.82601e-61	Mixed_Endo
ID1	3.36589e-60	0.320901	0.91	0.828	8.56685e-56	Mixed_Endo
PRTG	1.51309e-56	0.279191	0.82	0.741	3.8511e-52	Mixed_Endo
LAPTM5	6.2707e-51	0.257978	0.689	0.611	1.59602e-46	Mixed_Endo
NR2F2	4.6117e-48	0.267441	0.296	0.197	1.17377e-43	Mixed_Endo
ASAH1	3.91571e-38	0.277337	0.569	0.503	9.96627e-34	Mixed_Endo
PHLDA2	2.79124e-32	0.254586	0.372	0.29	7.10427e-28	Mixed_Endo
GDF15	5.23864e-17	0.300921	0.165	0.118	1.33334e-12	Mixed_Endo
UBE2C	0	3.22485	0.954	0.161	0	EHT_2
HIST1H4C	0	2.72599	0.877	0.604	0	EHT_2
TOP2A	0	2.72591	0.896	0.08	0	EHT_2
HMGB2	0	2.40886	0.986	0.522	0	EHT_2
PTTG1	0	2.3481	0.877	0.23	0	EHT_2
CENPF	0	2.33874	0.861	0.12	0	EHT_2
TPX2	0	2.17795	0.877	0.1	0	EHT_2
UBE2S	0	2.15637	0.934	0.418	0	EHT_2
CKS1B	0	2.04623	0.976	0.391	0	EHT_2
CCNB1	0	1.98712	0.798	0.111	0	EHT_2
MKI67	0	1.96364	0.827	0.039	0	EHT_2
KPNA2	0	1.82749	0.875	0.377	0	EHT_2
TUBA1B	0	1.76975	0.997	0.98	0	EHT_2
TUBB4B	0	1.75734	0.952	0.614	0	EHT_2
TYMS	0	1.75512	0.931	0.274	0	EHT_2
ARL6IP1	0	1.72371	0.878	0.587	0	EHT_2
NUSAP1	0	1.72364	0.818	0.058	0	EHT_2
CDK1	0	1.72013	0.769	0.089	0	EHT_2
CDC20	0	1.71795	0.709	0.079	0	EHT_2
ASPM	0	1.64784	0.71	0.053	0	EHT_2
BIRC5	0	1.5576	0.832	0.097	0	EHT_2
CCNB2	0	1.53898	0.773	0.126	0	EHT_2
AURKB	0	1.47691	0.815	0.073	0	EHT_2
HMGB1	0	1.45482	0.999	0.972	0	EHT_2
CKS2	0	1.45154	0.889	0.484	0	EHT_2
CDKN3	0	1.44454	0.7	0.068	0	EHT_2
HIST1H1D	0	1.43904	0.635	0.203	0	EHT_2
AURKA	0	1.42306	0.651	0.089	0	EHT_2
SMC4	0	1.41447	0.871	0.27	0	EHT_2
DLGAP5	0	1.39521	0.662	0.029	0	EHT_2
PLK1	0	1.34597	0.585	0.032	0	EHT_2
UBE2T	0	1.33207	0.828	0.181	0	EHT_2
CCNA2	0	1.3144	0.719	0.044	0	EHT_2
TUBA1C	0	1.2819	0.875	0.577	0	EHT_2
CENPE	0	1.26475	0.611	0.064	0	EHT_2
HMGB3	0	1.25739	0.848	0.406	0	EHT_2
H2AFZ	0	1.23383	0.994	0.917	0	EHT_2
PRC1	0	1.23202	0.703	0.081	0	EHT_2
MAD2L1	0	1.21645	0.839	0.234	0	EHT_2
HMMR	0	1.2056	0.59	0.034	0	EHT_2
HMGN2	0	1.19997	0.945	0.659	0	EHT_2
JPT1	0	1.19577	0.922	0.623	0	EHT_2
NUCKS1	0	1.17465	0.997	0.936	0	EHT_2
DUT	0	1.15883	0.82	0.509	0	EHT_2
NASP	0	1.13457	0.93	0.557	0	EHT_2
HIST1H1C	0	1.12904	0.601	0.181	0	EHT_2
GTSE1	0	1.12644	0.623	0.026	0	EHT_2
KIF2C	0	1.12084	0.625	0.029	0	EHT_2
NUF2	0	1.11056	0.628	0.032	0	EHT_2
TACC3	0	1.10895	0.641	0.046	0	EHT_2
CENPW	0	1.10577	0.826	0.229	0	EHT_2
STMN1	0	1.10518	0.995	0.927	0	EHT_2
KIF20B	0	1.10489	0.715	0.146	0	EHT_2
CKAP2	0	1.10189	0.691	0.169	0	EHT_2
SGO2	0	1.08875	0.627	0.11	0	EHT_2
H2AFX	0	1.08624	0.754	0.203	0	EHT_2
HIST1H1B	0	1.06732	0.53	0.04	0	EHT_2
PCLAF	0	1.0604	0.755	0.185	0	EHT_2
RRM2	0	1.03158	0.632	0.053	0	EHT_2
SPC25	0	1.02005	0.629	0.031	0	EHT_2
CDCA8	0	0.993814	0.56	0.034	0	EHT_2
MYBL2	0	0.983966	0.635	0.088	0	EHT_2
PCNA	0	0.974663	0.702	0.26	0	EHT_2
RAD51AP1	0	0.925542	0.616	0.093	0	EHT_2
DEK	0	0.925301	0.936	0.632	0	EHT_2
CALM2	0	0.904118	0.985	0.905	0	EHT_2
HIST1H1A	0	0.89886	0.462	0.055	0	EHT_2
ORC6	0	0.896988	0.707	0.182	0	EHT_2
CKAP5	0	0.891742	0.694	0.257	0	EHT_2
CENPA	0	0.889072	0.511	0.023	0	EHT_2
KIF11	0	0.887751	0.551	0.034	0	EHT_2
PBK	0	0.87873	0.577	0.026	0	EHT_2
TUBB	0	0.877315	0.999	0.996	0	EHT_2
HJURP	0	0.876854	0.515	0.021	0	EHT_2
DTYMK	0	0.875168	0.785	0.317	0	EHT_2
DEPDC1	0	0.867874	0.476	0.02	0	EHT_2
KIF20A	0	0.864329	0.457	0.012	0	EHT_2
KIFC1	0	0.860114	0.554	0.028	0	EHT_2
HNRNPA2B1	0	0.857771	0.99	0.911	0	EHT_2
LMNB1	0	0.855054	0.673	0.186	0	EHT_2
PIMREG	0	0.854928	0.492	0.021	0	EHT_2
BUB1	0	0.85424	0.502	0.036	0	EHT_2
HIST1H3D	0	0.848457	0.484	0.048	0	EHT_2
ZWINT	0	0.846675	0.604	0.086	0	EHT_2
RANBP1	0	0.842754	0.925	0.769	0	EHT_2
FBXO5	0	0.839847	0.565	0.096	0	EHT_2
MCM7	0	0.830743	0.693	0.211	0	EHT_2
KNSTRN	0	0.828558	0.55	0.09	0	EHT_2
H2AFV	0	0.822002	0.951	0.707	0	EHT_2
CBX5	0	0.807232	0.872	0.533	0	EHT_2
KIF22	0	0.798784	0.594	0.093	0	EHT_2
CENPH	0	0.797554	0.721	0.221	0	EHT_2
NCAPD2	0	0.797198	0.584	0.11	0	EHT_2
ARHGAP11A	0	0.795727	0.509	0.047	0	EHT_2
CENPN	0	0.793956	0.627	0.122	0	EHT_2
CDCA3	0	0.791167	0.485	0.014	0	EHT_2
KIF4A	0	0.790561	0.467	0.019	0	EHT_2
NEK2	0	0.78599	0.41	0.013	0	EHT_2
KNL1	0	0.784938	0.495	0.034	0	EHT_2
KIF23	0	0.780457	0.469	0.02	0	EHT_2
SKA2	0	0.776117	0.749	0.286	0	EHT_2
PSIP1	0	0.764754	0.882	0.584	0	EHT_2
NCAPG	0	0.764663	0.514	0.027	0	EHT_2
CKAP2L	0	0.760175	0.466	0.024	0	EHT_2
NDC80	0	0.755364	0.557	0.057	0	EHT_2
DHFR	0	0.751389	0.546	0.13	0	EHT_2
CENPU	0	0.739188	0.55	0.07	0	EHT_2
RRM1	0	0.73441	0.664	0.218	0	EHT_2
BUB3	0	0.728449	0.736	0.38	0	EHT_2
RPA3	0	0.726512	0.8	0.437	0	EHT_2
RAN	0	0.722403	0.997	0.958	0	EHT_2
ANLN	0	0.706669	0.472	0.039	0	EHT_2
GMNN	0	0.703931	0.633	0.199	0	EHT_2
CEP55	0	0.703313	0.419	0.019	0	EHT_2
ATAD2	0	0.700468	0.491	0.096	0	EHT_2
DIAPH3	0	0.688727	0.479	0.035	0	EHT_2
PRR11	0	0.688051	0.469	0.045	0	EHT_2
TTK	0	0.681495	0.445	0.032	0	EHT_2
ANP32E	0	0.673745	0.772	0.418	0	EHT_2
CLSPN	0	0.664347	0.454	0.078	0	EHT_2
HIST1H1E	0	0.662478	0.46	0.094	0	EHT_2
FANCI	0	0.653494	0.533	0.105	0	EHT_2
CENPK	0	0.649106	0.53	0.108	0	EHT_2
DBF4	0	0.647651	0.557	0.185	0	EHT_2
MND1	0	0.645751	0.529	0.087	0	EHT_2
CDCA2	0	0.640396	0.389	0.013	0	EHT_2
TK1	0	0.636438	0.463	0.048	0	EHT_2
HELLS	0	0.627923	0.516	0.151	0	EHT_2
CDT1	0	0.618697	0.517	0.121	0	EHT_2
SGO1	0	0.616589	0.459	0.051	0	EHT_2
MXD3	0	0.614074	0.388	0.024	0	EHT_2
SMC2	0	0.612836	0.651	0.265	0	EHT_2
FAM83D	0	0.605541	0.378	0.02	0	EHT_2
PSRC1	0	0.603548	0.356	0.031	0	EHT_2
KIF14	0	0.603187	0.369	0.015	0	EHT_2
BUB1B	0	0.602421	0.408	0.019	0	EHT_2
HIST1H3B	0	0.594632	0.381	0.016	0	EHT_2
CDCA4	0	0.59434	0.518	0.152	0	EHT_2
PHF19	0	0.591604	0.491	0.142	0	EHT_2
NUDT1	0	0.578883	0.63	0.24	0	EHT_2
FOXM1	0	0.578353	0.434	0.027	0	EHT_2
VRK1	0	0.575904	0.56	0.18	0	EHT_2
UBB	0	0.574855	1	0.987	0	EHT_2
CCNF	0	0.574854	0.379	0.039	0	EHT_2
CENPM	0	0.571267	0.441	0.058	0	EHT_2
CDCA5	0	0.569046	0.429	0.04	0	EHT_2
TMSB15A	0	0.567187	0.477	0.141	0	EHT_2
CIT	0	0.56335	0.393	0.029	0	EHT_2
HIST2H2AC	0	0.563175	0.367	0.064	0	EHT_2
CHEK1	0	0.563151	0.53	0.148	0	EHT_2
RACGAP1	0	0.562752	0.392	0.034	0	EHT_2
SPAG5	0	0.550781	0.387	0.023	0	EHT_2
GGH	0	0.546953	0.55	0.188	0	EHT_2
NCAPH	0	0.530835	0.381	0.019	0	EHT_2
KIF15	0	0.525784	0.375	0.023	0	EHT_2
HIST1H2AG	0	0.520111	0.337	0.035	0	EHT_2
ATAD5	0	0.516465	0.461	0.127	0	EHT_2
C21orf58	0	0.504885	0.373	0.054	0	EHT_2
NCAPD3	0	0.492574	0.443	0.108	0	EHT_2
GINS2	0	0.490566	0.421	0.105	0	EHT_2
LMNB2	0	0.488967	0.446	0.116	0	EHT_2
CDC25B	0	0.485009	0.336	0.05	0	EHT_2
KIF18A	0	0.482874	0.315	0.018	0	EHT_2
TROAP	0	0.472862	0.331	0.024	0	EHT_2
CHAF1A	0	0.463367	0.396	0.084	0	EHT_2
GINS1	0	0.45797	0.388	0.066	0	EHT_2
ASF1B	0	0.455571	0.349	0.03	0	EHT_2
PIF1	0	0.45388	0.254	0.006	0	EHT_2
ECT2	0	0.445028	0.355	0.076	0	EHT_2
GAS2L3	0	0.441654	0.253	0.019	0	EHT_2
CDC25C	0	0.439557	0.307	0.013	0	EHT_2
SPC24	0	0.413045	0.314	0.022	0	EHT_2
FANCD2	0	0.405587	0.317	0.038	0	EHT_2
MELK	0	0.401518	0.309	0.028	0	EHT_2
RTKN2	0	0.400309	0.297	0.024	0	EHT_2
DEPDC1B	0	0.399918	0.3	0.026	0	EHT_2
PARPBP	0	0.399836	0.338	0.056	0	EHT_2
NCAPG2	0	0.393426	0.336	0.056	0	EHT_2
STIL	0	0.377626	0.297	0.04	0	EHT_2
RAD51	0	0.376845	0.307	0.046	0	EHT_2
HIST1H2AL	0	0.375198	0.256	0.015	0	EHT_2
SKA3	0	0.374915	0.284	0.018	0	EHT_2
MCM10	0	0.368189	0.294	0.05	0	EHT_2
HIST1H3G	0	0.364763	0.24	0.007	0	EHT_2
CIP2A	0	0.355402	0.302	0.046	0	EHT_2
HIST1H2AH	0	0.350365	0.235	0.017	0	EHT_2
SHCBP1	0	0.349991	0.266	0.024	0	EHT_2
POC1A	0	0.335748	0.271	0.037	0	EHT_2
SKA1	0	0.33094	0.255	0.022	0	EHT_2
INCENP	0	0.325815	0.225	0.014	0	EHT_2
ESCO2	0	0.324609	0.234	0.016	0	EHT_2
TRIP13	0	0.321924	0.267	0.039	0	EHT_2
CDC45	0	0.312307	0.232	0.028	0	EHT_2
PKMYT1	0	0.303561	0.224	0.016	0	EHT_2
ARHGEF39	0	0.278662	0.191	0.008	0	EHT_2
KIF18B	0	0.265082	0.184	0.006	0	EHT_2
SNRPB	1.39552e-306	0.57497	0.988	0.955	3.55187e-302	EHT_2
TRIM59	1.60361e-302	0.570109	0.461	0.144	4.08151e-298	EHT_2
BRCA1	3.96936e-302	0.341112	0.298	0.054	1.01028e-297	EHT_2
MASTL	5.61777e-297	0.337098	0.283	0.05	1.42984e-292	EHT_2
LSM5	1.39799e-296	0.652735	0.906	0.653	3.55817e-292	EHT_2
DNMT1	1.30448e-295	0.660958	0.661	0.312	3.32016e-291	EHT_2
CHEK2	3.45833e-287	0.372436	0.344	0.079	8.80214e-283	EHT_2
RAD21	4.04589e-287	0.811262	0.865	0.621	1.02976e-282	EHT_2
CSE1L	2.82995e-284	0.582162	0.672	0.317	7.20279e-280	EHT_2
BLM	6.43184e-281	0.335911	0.294	0.057	1.63703e-276	EHT_2
FEN1	3.1309e-280	0.467142	0.423	0.124	7.96876e-276	EHT_2
RNF26	8.16115e-275	0.47086	0.428	0.132	2.07718e-270	EHT_2
TMPO	2.20809e-273	0.656975	0.797	0.482	5.62003e-269	EHT_2
G2E3	1.15245e-271	0.539761	0.484	0.173	2.93321e-267	EHT_2
DDX39A	7.62892e-271	0.490756	0.49	0.173	1.94171e-266	EHT_2
MTFR2	5.43352e-270	0.251063	0.2	0.024	1.38294e-265	EHT_2
NSD2	1.37012e-269	0.516405	0.557	0.222	3.48723e-265	EHT_2
LIG1	3.30426e-269	0.414424	0.404	0.118	8.41e-265	EHT_2
SRSF3	4.29835e-266	0.605214	0.965	0.851	1.09402e-261	EHT_2
SAE1	7.38204e-263	0.543	0.687	0.34	1.87888e-258	EHT_2
SMC3	3.8184e-262	0.649453	0.82	0.523	9.71858e-258	EHT_2
RFC3	5.24371e-262	0.40242	0.402	0.118	1.33463e-257	EHT_2
PLK4	6.3583e-260	0.2638	0.216	0.031	1.61831e-255	EHT_2
SPDL1	1.10856e-258	0.437896	0.408	0.123	2.82151e-254	EHT_2
CDC6	2.24007e-258	0.336995	0.273	0.053	5.70142e-254	EHT_2
DNAJC9	6.72699e-258	0.517329	0.532	0.208	1.71215e-253	EHT_2
HSP90AA1	2.01844e-257	0.595079	1	0.996	5.13733e-253	EHT_2
PRIM1	1.29684e-256	0.402024	0.377	0.106	3.30073e-252	EHT_2
CCDC34	2.10517e-256	0.519663	0.598	0.258	5.35808e-252	EHT_2
LBR	2.46138e-255	0.657043	0.66	0.339	6.26469e-251	EHT_2
SNRPD1	3.32876e-255	0.630779	0.969	0.871	8.47236e-251	EHT_2
CCDC18	3.62352e-255	0.294952	0.262	0.049	9.22258e-251	EHT_2
HIST1H2BH	2.72865e-253	0.257586	0.202	0.027	6.94495e-249	EHT_2
SMC1A	1.42462e-249	0.648301	0.661	0.336	3.62595e-245	EHT_2
DSCC1	8.02212e-248	0.281118	0.232	0.039	2.04179e-243	EHT_2
DTL	8.28831e-248	0.301431	0.27	0.053	2.10954e-243	EHT_2
USP1	8.50918e-247	0.505743	0.552	0.232	2.16576e-242	EHT_2
REEP4	1.18581e-245	0.356002	0.296	0.068	3.01812e-241	EHT_2
MCM4	2.74483e-244	0.46833	0.388	0.115	6.98613e-240	EHT_2
SCLT1	3.28384e-236	0.385544	0.345	0.096	8.35804e-232	EHT_2
HAUS8	5.60952e-236	0.298708	0.279	0.061	1.42774e-231	EHT_2
HMGN5	6.64629e-236	0.496507	0.499	0.193	1.69161e-231	EHT_2
PA2G4	1.84099e-233	0.634632	0.919	0.75	4.68568e-229	EHT_2
BRCA2	9.34655e-232	0.361414	0.331	0.088	2.37888e-227	EHT_2
MGME1	4.71482e-230	0.419814	0.455	0.164	1.20002e-225	EHT_2
RFC4	4.77213e-227	0.428691	0.443	0.16	1.2146e-222	EHT_2
RFC5	6.81599e-227	0.306055	0.288	0.068	1.7348e-222	EHT_2
CENPV	9.47256e-227	0.636539	0.695	0.385	2.41096e-222	EHT_2
CRNDE	4.4502e-223	0.452327	0.492	0.195	1.13267e-218	EHT_2
RBBP7	1.64234e-221	0.55555	0.795	0.514	4.18009e-217	EHT_2
H1FX	7.82429e-221	0.640702	0.883	0.676	1.99144e-216	EHT_2
HNRNPD	9.05555e-221	0.629981	0.901	0.708	2.30482e-216	EHT_2
TUBB6	2.39731e-219	0.635742	0.745	0.456	6.10165e-215	EHT_2
EXOSC8	7.08374e-219	0.491801	0.62	0.306	1.80295e-214	EHT_2
LSM3	2.01276e-217	0.53397	0.896	0.669	5.12289e-213	EHT_2
MIS18A	6.08307e-217	0.452277	0.541	0.236	1.54826e-212	EHT_2
COX8A	1.22182e-216	0.494688	0.975	0.88	3.10977e-212	EHT_2
CDK5RAP2	2.20862e-216	0.383864	0.404	0.136	5.62137e-212	EHT_2
PRKDC	9.09123e-216	0.653628	0.856	0.636	2.3139e-211	EHT_2
MCM3	2.32789e-212	0.519411	0.518	0.223	5.92493e-208	EHT_2
RUVBL2	1.30535e-211	0.462186	0.604	0.294	3.32237e-207	EHT_2
RHEB	1.63112e-210	0.562092	0.853	0.617	4.15152e-206	EHT_2
CENPJ	7.36012e-206	0.329814	0.327	0.095	1.8733e-201	EHT_2
TUBG1	5.57535e-205	0.434131	0.541	0.243	1.41904e-200	EHT_2
CALM3	5.89111e-205	0.524041	0.951	0.823	1.49941e-200	EHT_2
CDC25A	1.69353e-203	0.30226	0.274	0.068	4.31038e-199	EHT_2
CTSV	1.58711e-202	0.380932	0.344	0.104	4.0395e-198	EHT_2
NDE1	8.60403e-202	0.329969	0.286	0.076	2.1899e-197	EHT_2
ERH	5.64128e-201	0.476196	0.969	0.88	1.43582e-196	EHT_2
WEE1	2.09525e-200	0.382165	0.392	0.137	5.33282e-196	EHT_2
DSN1	2.96329e-195	0.328471	0.329	0.1	7.54217e-191	EHT_2
LSM4	3.93957e-195	0.500847	0.909	0.737	1.0027e-190	EHT_2
PSMC3IP	3.34545e-190	0.274889	0.248	0.059	8.51484e-186	EHT_2
SRSF2	3.61923e-190	0.542599	0.812	0.56	9.21166e-186	EHT_2
SAP30	7.03821e-190	0.376068	0.394	0.144	1.79137e-185	EHT_2
MCM2	3.09627e-189	0.342939	0.341	0.109	7.88062e-185	EHT_2
RMI2	1.5021e-188	0.265087	0.23	0.051	3.82314e-184	EHT_2
TIMELESS	2.65782e-188	0.295634	0.305	0.088	6.76469e-184	EHT_2
PTMA	1.33334e-187	0.364586	1	1	3.39362e-183	EHT_2
PARP1	2.89542e-187	0.550909	0.805	0.563	7.36943e-183	EHT_2
HP1BP3	2.95639e-187	0.601758	0.759	0.511	7.52461e-183	EHT_2
KNTC1	7.09314e-187	0.25056	0.223	0.049	1.80534e-182	EHT_2
HACD3	9.47881e-187	0.519741	0.876	0.658	2.41255e-182	EHT_2
SNRPG	1.06836e-186	0.496723	0.953	0.85	2.7192e-182	EHT_2
CMC2	6.80036e-185	0.417599	0.559	0.272	1.73083e-180	EHT_2
ACYP1	1.25309e-183	0.343317	0.362	0.126	3.18936e-179	EHT_2
BCL2L12	2.31932e-180	0.409988	0.562	0.277	5.90314e-176	EHT_2
HIRIP3	5.85859e-180	0.27346	0.261	0.069	1.49113e-175	EHT_2
GPSM2	8.0343e-180	0.314624	0.268	0.073	2.04489e-175	EHT_2
BRD8	2.42445e-178	0.323997	0.326	0.106	6.17071e-174	EHT_2
ACTB	6.24075e-177	0.461026	0.999	0.999	1.5884e-172	EHT_2
KIAA0586	7.21954e-177	0.331578	0.322	0.104	1.83752e-172	EHT_2
UHRF1	2.93129e-172	0.279433	0.256	0.068	7.46072e-168	EHT_2
DYNLL1	4.31159e-171	0.56257	0.962	0.918	1.09738e-166	EHT_2
HDGF	5.00382e-171	0.50753	0.659	0.384	1.27357e-166	EHT_2
PPIA	1.9326e-170	0.356418	0.999	0.999	4.91886e-166	EHT_2
RHNO1	1.23445e-168	0.330373	0.367	0.135	3.14193e-164	EHT_2
HNRNPA3	4.11154e-168	0.486785	0.973	0.91	1.04647e-163	EHT_2
MIS18BP1	1.40694e-167	0.553392	0.721	0.466	3.58095e-163	EHT_2
CACYBP	8.05719e-167	0.478761	0.772	0.512	2.05072e-162	EHT_2
HNRNPAB	1.44765e-166	0.541237	0.83	0.601	3.68455e-162	EHT_2
CHCHD2	4.66179e-166	0.370796	0.998	0.994	1.18652e-161	EHT_2
ARHGAP19	5.72073e-165	0.332276	0.336	0.119	1.45604e-160	EHT_2
CCT5	4.91249e-163	0.476025	0.899	0.749	1.25033e-158	EHT_2
ZNF93	2.00651e-162	0.303326	0.331	0.115	5.10698e-158	EHT_2
ILF2	6.79889e-162	0.461945	0.909	0.763	1.73045e-157	EHT_2
MDC1	8.05856e-162	0.266146	0.27	0.08	2.05107e-157	EHT_2
MCM8	9.06272e-162	0.322309	0.339	0.121	2.30664e-157	EHT_2
POLD1	2.26643e-161	0.303055	0.306	0.101	5.76851e-157	EHT_2
PSMC3	2.5495e-161	0.450956	0.672	0.406	6.489e-157	EHT_2
CTNNAL1	9.88157e-161	0.426172	0.578	0.305	2.51506e-156	EHT_2
MZT1	1.45394e-160	0.484105	0.583	0.322	3.70057e-156	EHT_2
HNRNPR	3.50269e-160	0.481531	0.874	0.68	8.91506e-156	EHT_2
SRSF7	9.9106e-159	0.494268	0.914	0.758	2.52245e-154	EHT_2
SFPQ	1.99777e-157	0.558975	0.832	0.612	5.08472e-153	EHT_2
UQCC2	2.91294e-157	0.493266	0.867	0.683	7.41401e-153	EHT_2
TMEM97	4.27768e-157	0.432303	0.662	0.387	1.08875e-152	EHT_2
TMEM106C	5.17298e-156	0.379649	0.451	0.204	1.31663e-151	EHT_2
E2F1	8.42688e-156	0.273976	0.247	0.069	2.14481e-151	EHT_2
RPL39L	1.22497e-154	0.370062	0.388	0.16	3.1178e-150	EHT_2
H3F3A	1.02246e-152	0.320637	1	1	2.60238e-148	EHT_2
SNRPF	1.13498e-152	0.419158	0.963	0.896	2.88876e-148	EHT_2
EZH2	2.61126e-152	0.315616	0.347	0.13	6.64618e-148	EHT_2
XRCC6	1.00516e-151	0.433404	0.88	0.676	2.55834e-147	EHT_2
ALYREF	2.60542e-151	0.394885	0.519	0.263	6.63131e-147	EHT_2
RFC2	1.96019e-150	0.349264	0.404	0.171	4.98909e-146	EHT_2
PFN1	3.87631e-150	0.369714	1	0.998	9.86598e-146	EHT_2
LRR1	6.10641e-150	0.288429	0.314	0.111	1.5542e-145	EHT_2
CNTRL	1.98041e-149	0.332983	0.32	0.116	5.04053e-145	EHT_2
TMEM160	8.37342e-149	0.41766	0.705	0.442	2.1312e-144	EHT_2
ANP32B	9.89294e-149	0.403644	0.987	0.93	2.51795e-144	EHT_2
HLTF	1.62163e-148	0.431792	0.594	0.333	4.12738e-144	EHT_2
SYNE2	4.65298e-147	0.342521	0.327	0.121	1.18428e-142	EHT_2
EMC9	3.76524e-146	0.317094	0.34	0.13	9.5833e-142	EHT_2
HNRNPM	6.36718e-146	0.478783	0.823	0.597	1.62057e-141	EHT_2
RANGAP1	4.56993e-145	0.312212	0.345	0.134	1.16314e-140	EHT_2
HMG20B	2.54955e-143	0.384137	0.499	0.254	6.48911e-139	EHT_2
MPHOSPH9	4.77652e-143	0.280035	0.33	0.123	1.21572e-138	EHT_2
NUP37	5.80977e-142	0.371924	0.503	0.257	1.4787e-137	EHT_2
BANF1	1.22732e-141	0.438214	0.924	0.79	3.12376e-137	EHT_2
CEP70	9.48519e-141	0.281606	0.263	0.085	2.41417e-136	EHT_2
FBLN1	1.87675e-140	0.437633	0.799	0.566	4.77672e-136	EHT_2
SRP9	2.0055e-140	0.414598	0.869	0.673	5.1044e-136	EHT_2
MRPL51	5.84441e-139	0.40524	0.94	0.835	1.48752e-134	EHT_2
RBMX	6.46312e-139	0.422121	0.934	0.799	1.64499e-134	EHT_2
ZNF850	1.01466e-138	0.282138	0.271	0.09	2.58251e-134	EHT_2
HNRNPA1	6.00965e-138	0.364046	0.998	0.976	1.52958e-133	EHT_2
COMMD4	1.60411e-137	0.364278	0.477	0.238	4.08278e-133	EHT_2
HMGN1	1.63532e-137	0.33438	0.995	0.972	4.16221e-133	EHT_2
PGP	1.4914e-135	0.383908	0.558	0.307	3.79592e-131	EHT_2
FDPS	1.49574e-135	0.491772	0.814	0.608	3.80695e-131	EHT_2
FABP5	3.10686e-135	0.563973	0.797	0.609	7.90757e-131	EHT_2
POP7	4.75874e-135	0.349211	0.492	0.25	1.21119e-130	EHT_2
ACAT2	1.31741e-134	0.403873	0.464	0.226	3.35308e-130	EHT_2
CENPQ	5.21469e-134	0.256231	0.293	0.104	1.32724e-129	EHT_2
YEATS4	1.30178e-133	0.312585	0.386	0.167	3.3133e-129	EHT_2
CDCA7	2.05741e-133	0.379045	0.536	0.288	5.23653e-129	EHT_2
SUN2	2.31766e-133	0.257874	0.243	0.077	5.8989e-129	EHT_2
TTF2	1.20366e-132	0.278794	0.299	0.11	3.06357e-128	EHT_2
CCDC167	3.90381e-132	0.399653	0.628	0.381	9.93598e-128	EHT_2
HSPD1	8.79983e-132	0.418559	0.983	0.959	2.23973e-127	EHT_2
YWHAQ	9.04342e-131	0.401151	0.841	0.634	2.30173e-126	EHT_2
RALY	1.02487e-130	0.410808	0.836	0.641	2.60849e-126	EHT_2
HNRNPH3	4.35917e-130	0.429782	0.893	0.748	1.1095e-125	EHT_2
BARD1	1.16377e-128	0.276006	0.332	0.132	2.96202e-124	EHT_2
TIMM10	1.20813e-128	0.391872	0.646	0.402	3.07492e-124	EHT_2
KMT5A	2.24157e-128	0.290125	0.282	0.102	5.70525e-124	EHT_2
AAAS	2.49204e-128	0.327371	0.464	0.231	6.34275e-124	EHT_2
ITGB3BP	3.35168e-128	0.36226	0.569	0.325	8.53071e-124	EHT_2
MGST1	8.639e-128	0.399685	0.494	0.259	2.1988e-123	EHT_2
CCDC88A	8.92061e-128	0.403997	0.611	0.366	2.27047e-123	EHT_2
PTGES3	2.55372e-127	0.341843	0.996	0.976	6.49973e-123	EHT_2
MCM5	8.80085e-127	0.322299	0.339	0.139	2.23999e-122	EHT_2
PKM	5.08205e-126	0.422565	0.96	0.879	1.29348e-121	EHT_2
HSPB11	1.32672e-125	0.366424	0.606	0.362	3.37676e-121	EHT_2
POLR3K	2.57075e-125	0.343346	0.44	0.217	6.54308e-121	EHT_2
VDAC3	5.23029e-125	0.390834	0.698	0.466	1.33121e-120	EHT_2
MMS22L	6.27026e-125	0.256261	0.268	0.094	1.59591e-120	EHT_2
RNASEH2B	7.00846e-125	0.280824	0.331	0.135	1.78379e-120	EHT_2
ACTL6A	6.158e-124	0.324013	0.466	0.237	1.56734e-119	EHT_2
SNRPE	1.75222e-122	0.360516	0.972	0.922	4.45974e-118	EHT_2
TCOF1	3.61286e-121	0.310834	0.419	0.201	9.19544e-117	EHT_2
HNRNPDL	5.92507e-120	0.412677	0.915	0.791	1.50805e-115	EHT_2
GLRX5	7.15047e-120	0.399187	0.743	0.525	1.81994e-115	EHT_2
YBX1	8.41876e-120	0.283549	1	0.999	2.14274e-115	EHT_2
MTHFD2	1.08546e-119	0.38128	0.515	0.284	2.76272e-115	EHT_2
FKBP3	3.36566e-119	0.394877	0.761	0.533	8.56628e-115	EHT_2
NUP107	8.03088e-119	0.30129	0.424	0.206	2.04402e-114	EHT_2
PSME2	3.72171e-118	0.357356	0.572	0.337	9.47249e-114	EHT_2
RPA2	6.36437e-118	0.34675	0.53	0.3	1.61986e-113	EHT_2
RUVBL1	8.47465e-118	0.37145	0.565	0.331	2.15697e-113	EHT_2
FUS	1.65183e-117	0.397163	0.934	0.835	4.20423e-113	EHT_2
VBP1	1.81616e-117	0.359575	0.649	0.414	4.62248e-113	EHT_2
ARHGDIB	6.18332e-117	0.49859	0.713	0.487	1.57378e-112	EHT_2
SUPT16H	3.14327e-116	0.449076	0.785	0.593	8.00025e-112	EHT_2
MAPRE1	1.25721e-115	0.382226	0.766	0.558	3.19986e-111	EHT_2
BRD7	1.57872e-115	0.376074	0.664	0.431	4.01816e-111	EHT_2
ANAPC11	2.30688e-114	0.368148	0.938	0.828	5.87146e-110	EHT_2
ILF3	5.81584e-114	0.38215	0.737	0.52	1.48025e-109	EHT_2
SNRPA	6.6288e-114	0.362959	0.699	0.466	1.68716e-109	EHT_2
KLF1	9.86217e-114	0.261053	0.14	0.031	2.51012e-109	EHT_2
EIF5A	1.51962e-113	0.45717	0.858	0.697	3.86775e-109	EHT_2
RPA1	3.62948e-113	0.325958	0.491	0.27	9.23776e-109	EHT_2
CYCS	3.8536e-113	0.434807	0.78	0.589	9.80818e-109	EHT_2
HMGN3	4.52071e-113	0.412566	0.802	0.605	1.15061e-108	EHT_2
ECI1	1.95374e-112	0.347146	0.547	0.322	4.97266e-108	EHT_2
PIN1	3.17927e-112	0.367047	0.711	0.49	8.09188e-108	EHT_2
MAGOHB	3.71297e-111	0.318635	0.53	0.299	9.45025e-107	EHT_2
TALDO1	6.18538e-111	0.423599	0.761	0.557	1.5743e-106	EHT_2
PSMB3	1.03603e-110	0.374696	0.914	0.797	2.6369e-106	EHT_2
MTHFD1	2.30193e-110	0.270527	0.34	0.15	5.85888e-106	EHT_2
C19orf48	2.30843e-110	0.32603	0.472	0.252	5.87541e-106	EHT_2
MYL4	8.18575e-110	0.841554	0.326	0.146	2.08344e-105	EHT_2
XRCC5	9.23043e-110	0.368873	0.956	0.911	2.34933e-105	EHT_2
PSMA4	1.5983e-109	0.386412	0.877	0.725	4.068e-105	EHT_2
GLA	3.21939e-109	0.30792	0.409	0.2	8.194e-105	EHT_2
YWHAB	4.32305e-109	0.387732	0.952	0.884	1.1003e-104	EHT_2
H2AFY	1.67638e-108	0.380722	0.727	0.504	4.26672e-104	EHT_2
TRA2B	1.84148e-108	0.359025	0.683	0.451	4.68693e-104	EHT_2
WBP11	2.94181e-107	0.347595	0.686	0.461	7.4875e-103	EHT_2
MDH1	1.29108e-106	0.347508	0.661	0.439	3.28606e-102	EHT_2
HPRT1	1.41464e-106	0.341315	0.563	0.339	3.60053e-102	EHT_2
CFL1	2.15623e-106	0.312846	0.998	0.995	5.48804e-102	EHT_2
COA1	3.23356e-106	0.364132	0.735	0.529	8.23005e-102	EHT_2
DKC1	3.24396e-105	0.353884	0.654	0.423	8.25652e-101	EHT_2
CTCF	3.69764e-105	0.322797	0.487	0.274	9.41122e-101	EHT_2
PPM1G	5.61937e-105	0.384728	0.849	0.684	1.43024e-100	EHT_2
SNRPD3	7.06794e-105	0.35424	0.785	0.578	1.79893e-100	EHT_2
CPSF3	9.87519e-105	0.265379	0.359	0.168	2.51343e-100	EHT_2
HADH	1.7184e-104	0.318106	0.52	0.3	4.37367e-100	EHT_2
PSMD1	5.89161e-104	0.37825	0.656	0.441	1.49953e-99	EHT_2
GYPE	1.61331e-103	0.288438	0.141	0.034	4.10619e-99	EHT_2
SRRT	1.98729e-103	0.25771	0.338	0.153	5.05806e-99	EHT_2
SNRNP25	1.32954e-102	0.285905	0.359	0.17	3.38395e-98	EHT_2
GYPB	1.48066e-102	0.481336	0.158	0.043	3.76859e-98	EHT_2
HAT1	6.49181e-102	0.292413	0.439	0.233	1.6523e-97	EHT_2
HAGH	9.4503e-102	0.300379	0.475	0.262	2.40529e-97	EHT_2
ODF2	1.50697e-101	0.258692	0.3	0.128	3.83555e-97	EHT_2
UBALD2	1.85956e-101	0.395405	0.477	0.274	4.73295e-97	EHT_2
NME1	2.20734e-101	0.444054	0.714	0.509	5.61812e-97	EHT_2
CEP295	2.72072e-101	0.258179	0.324	0.144	6.92477e-97	EHT_2
NOP58	2.78972e-101	0.349298	0.634	0.416	7.10039e-97	EHT_2
PSMD14	3.26177e-101	0.324729	0.608	0.385	8.30185e-97	EHT_2
HNRNPL	8.46609e-101	0.318817	0.577	0.356	2.15479e-96	EHT_2
SSRP1	4.76909e-100	0.326638	0.742	0.516	1.21383e-95	EHT_2
SMARCA4	1.26079e-99	0.33009	0.674	0.449	3.20896e-95	EHT_2
HMGA1	2.50456e-99	0.392802	0.955	0.899	6.3746e-95	EHT_2
HSPE1	3.83294e-99	0.433591	0.935	0.877	9.7556e-95	EHT_2
PRKAR2B	3.32462e-98	0.326778	0.235	0.089	8.46182e-94	EHT_2
POLD2	7.5393e-98	0.301532	0.573	0.351	1.9189e-93	EHT_2
COPS3	9.04194e-98	0.322869	0.571	0.357	2.30135e-93	EHT_2
CMSS1	2.36421e-97	0.310999	0.524	0.31	6.01739e-93	EHT_2
BOLA3	1.22544e-96	0.282495	0.429	0.228	3.119e-92	EHT_2
PRPS1	4.37622e-96	0.308225	0.491	0.282	1.11384e-91	EHT_2
HNRNPA0	4.70008e-96	0.329138	0.896	0.735	1.19626e-91	EHT_2
C12orf75	8.30913e-96	0.267301	0.329	0.153	2.11484e-91	EHT_2
HAUS4	1.15661e-95	0.278574	0.486	0.274	2.9438e-91	EHT_2
HMGXB4	1.57039e-95	0.299032	0.575	0.352	3.99695e-91	EHT_2
UPF3B	8.04683e-95	0.331145	0.651	0.436	2.04808e-90	EHT_2
SUGP2	8.38015e-95	0.303326	0.474	0.266	2.13292e-90	EHT_2
CBX1	8.76824e-95	0.357344	0.684	0.485	2.23169e-90	EHT_2
PSMG1	2.55401e-94	0.307214	0.505	0.299	6.50048e-90	EHT_2
CDC27	5.34563e-94	0.289272	0.417	0.223	1.36057e-89	EHT_2
TAGLN2	3.64154e-93	0.407267	0.873	0.748	9.26846e-89	EHT_2
GPN3	1.16186e-92	0.287498	0.518	0.307	2.95717e-88	EHT_2
ANP32A	3.03416e-92	0.339022	0.891	0.768	7.72255e-88	EHT_2
SNRNP40	3.35582e-92	0.31498	0.558	0.353	8.54123e-88	EHT_2
CYC1	6.08661e-92	0.347551	0.749	0.556	1.54916e-87	EHT_2
SRPK1	1.8195e-90	0.311186	0.539	0.334	4.63099e-86	EHT_2
CTPS1	1.12557e-89	0.260408	0.354	0.176	2.86481e-85	EHT_2
SIVA1	2.13613e-89	0.35307	0.849	0.705	5.43688e-85	EHT_2
ALAS2	2.42563e-89	0.86938	0.157	0.048	6.17372e-85	EHT_2
KPNB1	2.81393e-89	0.344933	0.904	0.79	7.16201e-85	EHT_2
ANAPC15	2.81643e-89	0.251288	0.375	0.19	7.16838e-85	EHT_2
SNRPC	7.53864e-89	0.330639	0.855	0.7	1.91873e-84	EHT_2
CLEC11A	8.9354e-89	0.532645	0.685	0.505	2.27424e-84	EHT_2
NAE1	1.50898e-88	0.306028	0.62	0.408	3.84065e-84	EHT_2
PSMB2	3.37352e-88	0.334091	0.904	0.823	8.58629e-84	EHT_2
EXOSC9	7.89165e-88	0.266382	0.417	0.226	2.00858e-83	EHT_2
EIF1AX	1.23007e-87	0.34248	0.934	0.862	3.13078e-83	EHT_2
FBL	2.90384e-87	0.330918	0.83	0.672	7.39085e-83	EHT_2
PTN	4.7263e-87	0.254355	0.184	0.062	1.20294e-82	EHT_2
CBX3	1.06717e-86	0.31028	0.929	0.826	2.71616e-82	EHT_2
MSH2	4.36682e-86	0.268726	0.405	0.218	1.11144e-81	EHT_2
TPRKB	4.94115e-86	0.303452	0.677	0.468	1.25762e-81	EHT_2
CCDC14	9.73495e-86	0.265119	0.388	0.204	2.47774e-81	EHT_2
POLD3	1.0358e-85	0.2714	0.313	0.15	2.63631e-81	EHT_2
PNRC2	1.65943e-85	0.303103	0.623	0.412	4.22357e-81	EHT_2
PPIH	1.84872e-85	0.294578	0.571	0.366	4.70537e-81	EHT_2
TPR	7.5854e-85	0.369243	0.845	0.707	1.93064e-80	EHT_2
PTMS	1.31399e-84	0.433582	0.903	0.835	3.34436e-80	EHT_2
CCND3	2.41174e-84	0.409755	0.42	0.24	6.13836e-80	EHT_2
PAICS	3.79127e-84	0.335835	0.717	0.531	9.64955e-80	EHT_2
SRSF10	5.18725e-84	0.328266	0.706	0.515	1.32026e-79	EHT_2
RCC2	8.93455e-84	0.29481	0.544	0.345	2.27402e-79	EHT_2
HPF1	1.13333e-83	0.300428	0.559	0.358	2.88455e-79	EHT_2
MTCH2	3.8356e-83	0.29116	0.534	0.334	9.76238e-79	EHT_2
PMF1	4.4604e-83	0.269722	0.494	0.295	1.13526e-78	EHT_2
RAB8A	4.83832e-83	0.285466	0.582	0.379	1.23145e-78	EHT_2
AAMDC	7.79985e-83	0.303787	0.554	0.354	1.98522e-78	EHT_2
HAUS1	4.17659e-82	0.297133	0.608	0.41	1.06302e-77	EHT_2
RPN2	5.84359e-82	0.308484	0.919	0.81	1.48731e-77	EHT_2
UFD1	1.0577e-81	0.276515	0.473	0.283	2.69207e-77	EHT_2
TCERG1	1.52858e-81	0.312833	0.656	0.46	3.89054e-77	EHT_2
CENPC	8.86791e-81	0.264497	0.356	0.186	2.25706e-76	EHT_2
SNX5	2.42947e-80	0.299707	0.784	0.6	6.18349e-76	EHT_2
MRPL22	2.78062e-80	0.292314	0.681	0.486	7.07725e-76	EHT_2
MCM6	5.18716e-80	0.290695	0.361	0.189	1.32024e-75	EHT_2
PRDX3	2.29942e-79	0.304544	0.708	0.517	5.85248e-75	EHT_2
MYH10	2.55678e-79	0.349037	0.643	0.456	6.50752e-75	EHT_2
BAZ1B	2.73806e-79	0.29533	0.59	0.391	6.9689e-75	EHT_2
HINT2	3.7348e-79	0.295146	0.598	0.401	9.50581e-75	EHT_2
NUP93	5.25758e-79	0.25999	0.444	0.259	1.33816e-74	EHT_2
SNRNP48	6.34124e-79	0.253761	0.396	0.218	1.61397e-74	EHT_2
CCT7	2.10147e-78	0.310299	0.83	0.686	5.34867e-74	EHT_2
HNRNPUL2	2.51871e-78	0.27324	0.49	0.298	6.41063e-74	EHT_2
NUDC	4.90233e-78	0.314133	0.841	0.704	1.24774e-73	EHT_2
NUDCD2	6.64565e-78	0.292599	0.533	0.342	1.69145e-73	EHT_2
CDK4	8.30884e-78	0.325044	0.726	0.547	2.11477e-73	EHT_2
SNRPA1	9.75379e-78	0.28852	0.694	0.501	2.48253e-73	EHT_2
PLIN3	3.71296e-77	0.31093	0.607	0.417	9.45023e-73	EHT_2
HNRNPUL1	5.89673e-77	0.3055	0.722	0.538	1.50084e-72	EHT_2
UQCC3	1.15764e-76	0.254206	0.475	0.286	2.94644e-72	EHT_2
THOC7	1.91546e-76	0.302444	0.623	0.43	4.87522e-72	EHT_2
TMEM14B	2.2901e-76	0.316215	0.664	0.472	5.82875e-72	EHT_2
LAS1L	4.66498e-76	0.250665	0.398	0.222	1.18733e-71	EHT_2
TERF1	4.96284e-76	0.259716	0.5	0.306	1.26314e-71	EHT_2
TCTEX1D2	9.83054e-76	0.25285	0.446	0.263	2.50207e-71	EHT_2
PARK7	2.82187e-75	0.278159	0.979	0.937	7.18222e-71	EHT_2
MRPL57	2.92791e-75	0.291569	0.755	0.571	7.45212e-71	EHT_2
COX17	2.98869e-75	0.2837	0.574	0.385	7.6068e-71	EHT_2
IDH2	5.98928e-75	0.288058	0.863	0.731	1.52439e-70	EHT_2
DIAPH1	1.18254e-74	0.272661	0.44	0.26	3.00979e-70	EHT_2
XPO1	1.35445e-74	0.323866	0.732	0.559	3.44736e-70	EHT_2
MRPL37	1.36947e-74	0.280586	0.586	0.395	3.48557e-70	EHT_2
NDUFS6	1.68083e-74	0.291564	0.915	0.811	4.27804e-70	EHT_2
CTNNBL1	2.50568e-74	0.325916	0.678	0.493	6.37746e-70	EHT_2
PITHD1	3.25045e-74	0.256957	0.461	0.28	8.27305e-70	EHT_2
SF3A3	4.64791e-74	0.256664	0.539	0.343	1.18299e-69	EHT_2
ENY2	5.15182e-74	0.295043	0.88	0.756	1.31124e-69	EHT_2
PIH1D1	9.90253e-74	0.255804	0.518	0.327	2.52039e-69	EHT_2
MT2A	1.95372e-73	0.506835	0.374	0.205	4.97262e-69	EHT_2
MRPL14	2.51549e-73	0.283849	0.745	0.56	6.40243e-69	EHT_2
NAP1L4	6.10414e-73	0.279194	0.658	0.464	1.55363e-68	EHT_2
ALDH7A1	6.41818e-73	0.263421	0.485	0.301	1.63355e-68	EHT_2
SMARCA5	1.00205e-72	0.328934	0.743	0.565	2.5504e-68	EHT_2
PSMD2	1.82619e-72	0.278656	0.629	0.437	4.64803e-68	EHT_2
AIFM1	1.9078e-72	0.266198	0.536	0.347	4.85574e-68	EHT_2
SSB	9.92034e-72	0.277988	0.942	0.87	2.52493e-67	EHT_2
MTF2	1.51104e-71	0.287942	0.642	0.459	3.84589e-67	EHT_2
PDCD5	3.58653e-71	0.285472	0.89	0.774	9.12845e-67	EHT_2
LYAR	7.55436e-71	0.262931	0.518	0.329	1.92274e-66	EHT_2
SMARCB1	2.07123e-70	0.269536	0.576	0.391	5.2717e-66	EHT_2
RPP30	4.62432e-70	0.250759	0.495	0.313	1.17698e-65	EHT_2
DYNC1LI1	9.08381e-70	0.282549	0.674	0.49	2.31201e-65	EHT_2
RBX1	1.15384e-69	0.26956	0.946	0.876	2.93676e-65	EHT_2
STIP1	1.25563e-69	0.293422	0.691	0.504	3.19582e-65	EHT_2
GMPS	2.35659e-69	0.286353	0.714	0.538	5.99799e-65	EHT_2
TPM3	3.07752e-69	0.293417	0.952	0.91	7.8329e-65	EHT_2
MRPL18	3.43594e-69	0.261308	0.559	0.372	8.74516e-65	EHT_2
GTF2A2	3.52146e-69	0.289368	0.734	0.56	8.96283e-65	EHT_2
FADS1	5.03023e-69	0.30627	0.752	0.58	1.28029e-64	EHT_2
VPS29	1.17852e-68	0.280492	0.632	0.451	2.99957e-64	EHT_2
EWSR1	1.81609e-68	0.26387	0.656	0.466	4.62232e-64	EHT_2
PCMT1	4.15372e-68	0.265542	0.682	0.497	1.05721e-63	EHT_2
RABL6	4.23284e-68	0.271987	0.55	0.37	1.07734e-63	EHT_2
DHX9	5.11779e-68	0.258956	0.536	0.353	1.30258e-63	EHT_2
RUNX1	7.30605e-68	0.282954	0.372	0.208	1.85953e-63	EHT_2
CNOT1	1.1059e-67	0.250268	0.485	0.307	2.81474e-63	EHT_2
UBE2N	1.29754e-67	0.274952	0.693	0.509	3.30251e-63	EHT_2
TOMM5	1.2991e-67	0.325703	0.851	0.731	3.30648e-63	EHT_2
UQCRC1	1.45975e-67	0.260316	0.635	0.449	3.71535e-63	EHT_2
TECR	1.69274e-67	0.282251	0.719	0.553	4.30835e-63	EHT_2
ISCA2	2.00975e-67	0.250113	0.505	0.326	5.11522e-63	EHT_2
TFAM	2.76487e-67	0.27103	0.58	0.401	7.03714e-63	EHT_2
RTF1	2.8562e-67	0.277693	0.828	0.672	7.26961e-63	EHT_2
CEP57	4.53898e-67	0.279732	0.687	0.502	1.15526e-62	EHT_2
EBP	1.46527e-66	0.258285	0.468	0.293	3.72939e-62	EHT_2
AURKAIP1	2.07652e-66	0.282835	0.868	0.747	5.28516e-62	EHT_2
LSM7	3.04617e-66	0.264304	0.943	0.873	7.75312e-62	EHT_2
TOP1	3.34397e-66	0.307378	0.833	0.701	8.51107e-62	EHT_2
DCAF7	4.87301e-66	0.296261	0.685	0.519	1.24028e-61	EHT_2
PSMA3	8.1899e-66	0.286457	0.776	0.615	2.08449e-61	EHT_2
TCP1	8.52627e-66	0.280591	0.82	0.66	2.17011e-61	EHT_2
RAD23A	8.8362e-66	0.275556	0.74	0.574	2.24899e-61	EHT_2
MRPL17	2.18468e-65	0.271806	0.642	0.461	5.56046e-61	EHT_2
UBE2I	8.60636e-65	0.27274	0.91	0.807	2.19049e-60	EHT_2
EEF1B2	1.97366e-64	0.250175	0.997	0.994	5.02336e-60	EHT_2
RBBP4	2.94345e-63	0.267759	0.72	0.551	7.49167e-59	EHT_2
PDAP1	8.40474e-63	0.263211	0.713	0.534	2.13918e-58	EHT_2
SLIRP	3.73067e-62	0.280225	0.849	0.727	9.4953e-58	EHT_2
UBA2	4.53754e-62	0.259735	0.664	0.487	1.1549e-57	EHT_2
RALBP1	7.86202e-62	0.274553	0.713	0.549	2.00104e-57	EHT_2
MRPS6	2.67899e-61	0.259066	0.635	0.457	6.81857e-57	EHT_2
SERBP1	5.74047e-61	0.25383	0.987	0.974	1.46107e-56	EHT_2
CDKN2D	7.68038e-61	0.278543	0.433	0.272	1.95481e-56	EHT_2
PHIP	2.02495e-60	0.26377	0.599	0.421	5.15389e-56	EHT_2
GCSH	1.60075e-59	0.276785	0.643	0.479	4.07422e-55	EHT_2
NDUFAF3	2.54504e-59	0.262829	0.721	0.56	6.47763e-55	EHT_2
LDHB	2.89036e-59	0.252567	0.987	0.984	7.35655e-55	EHT_2
MRPL47	2.92122e-59	0.26249	0.679	0.511	7.43509e-55	EHT_2
RBM8A	3.08476e-59	0.252029	0.911	0.846	7.85132e-55	EHT_2
TFDP2	3.76153e-59	0.293035	0.519	0.352	9.57383e-55	EHT_2
TXNDC17	7.54183e-59	0.270896	0.768	0.604	1.91955e-54	EHT_2
UROD	1.45003e-58	0.325663	0.48	0.323	3.69062e-54	EHT_2
GGCT	1.93334e-58	0.252535	0.643	0.47	4.92075e-54	EHT_2
NT5DC2	2.36796e-58	0.254933	0.675	0.501	6.02693e-54	EHT_2
BRIX1	2.60745e-58	0.251595	0.572	0.404	6.63649e-54	EHT_2
IQGAP2	3.01181e-58	0.304267	0.565	0.399	7.66566e-54	EHT_2
ZMYND8	8.29106e-58	0.327578	0.696	0.54	2.11024e-53	EHT_2
TPI1	4.42841e-57	0.296004	0.981	0.953	1.12712e-52	EHT_2
PSMD11	5.17525e-57	0.250904	0.628	0.462	1.31721e-52	EHT_2
CSRP2	1.3666e-56	0.261406	0.678	0.508	3.47826e-52	EHT_2
NDUFA11	2.05484e-56	0.252196	0.913	0.821	5.22999e-52	EHT_2
NDUFA6	4.94415e-56	0.250182	0.793	0.642	1.25838e-51	EHT_2
CKB	8.30288e-56	0.332226	0.392	0.244	2.11325e-51	EHT_2
MAGOH	1.04141e-55	0.254774	0.732	0.579	2.65061e-51	EHT_2
CCT3	1.54415e-55	0.262884	0.906	0.829	3.93017e-51	EHT_2
SAMSN1	2.52905e-55	0.289791	0.551	0.375	6.43693e-51	EHT_2
HSPA8	1.28639e-54	0.278514	0.966	0.946	3.27413e-50	EHT_2
GSPT1	8.07642e-53	0.25295	0.74	0.584	2.05561e-48	EHT_2
HNRNPU	6.23198e-52	0.294233	0.888	0.803	1.58616e-47	EHT_2
DDX46	1.54582e-50	0.253919	0.701	0.548	3.93443e-46	EHT_2
CALR	2.22947e-50	0.264788	0.941	0.885	5.67445e-46	EHT_2
ATP5MC1	7.2661e-50	0.292999	0.712	0.575	1.84937e-45	EHT_2
YWHAH	1.19639e-49	0.252423	0.823	0.677	3.04506e-45	EHT_2
FDFT1	3.73012e-48	0.271593	0.781	0.644	9.49391e-44	EHT_2
SEPTIN7	4.34156e-48	0.251546	0.949	0.909	1.10501e-43	EHT_2
NCL	1.04575e-46	0.332552	0.956	0.935	2.66163e-42	EHT_2
TMEM14C	2.99391e-45	0.262201	0.84	0.722	7.62011e-41	EHT_2
C1QBP	1.3531e-43	0.270558	0.812	0.702	3.44391e-39	EHT_2
TUBA1A	3.29385e-41	0.32447	0.808	0.725	8.38351e-37	EHT_2
PHF6	3.65141e-41	0.262306	0.67	0.544	9.29356e-37	EHT_2
SLC25A37	3.51447e-24	0.493253	0.562	0.47	8.94504e-20	EHT_2
BLVRB	2.72646e-15	0.495791	0.601	0.537	6.93939e-11	EHT_2
HBD	9.54606e-14	0.443846	0.118	0.074	2.42966e-09	EHT_2
CRHBP	0	2.59469	0.878	0.287	0	Venous_1
TFPI2	0	2.36525	0.681	0.175	0	Venous_1
COL3A1	0	1.74834	0.64	0.205	0	Venous_1
SPARC	0	1.31291	0.903	0.66	0	Venous_1
JAG1	0	1.18299	0.679	0.286	0	Venous_1
P2RY1	0	0.851108	0.479	0.103	0	Venous_1
HOXA13	0	0.582764	0.325	0.031	0	Venous_1
ITM2B	7.42715e-293	1.15926	0.993	0.96	1.89036e-288	Venous_1
TCIM	3.61173e-286	1.16564	0.716	0.324	9.19257e-282	Venous_1
NTS	5.95504e-273	1.62299	0.631	0.266	1.51568e-268	Venous_1
GNG11	2.12013e-266	1.05734	0.975	0.846	5.39615e-262	Venous_1
JAM2	1.48156e-263	0.435707	0.205	0.023	3.77086e-259	Venous_1
PAG1	2.78098e-248	0.378539	0.236	0.035	7.07816e-244	Venous_1
NRP2	4.06694e-245	0.958662	0.946	0.691	1.03512e-240	Venous_1
BST2	1.33341e-242	0.72795	0.995	0.939	3.3938e-238	Venous_1
CLEC1B	6.0702e-242	0.486927	0.136	0.008	1.54499e-237	Venous_1
KDR	1.84639e-234	0.811689	0.978	0.846	4.69944e-230	Venous_1
COL1A2	6.72018e-233	0.961484	0.853	0.552	1.71042e-228	Venous_1
HOXA10	4.94358e-231	0.600142	0.403	0.114	1.25824e-226	Venous_1
SGK1	5.83112e-224	0.74308	0.461	0.156	1.48414e-219	Venous_1
HOPX	1.54004e-217	0.940134	0.829	0.56	3.9197e-213	Venous_1
HOXA11	8.60977e-208	0.367226	0.255	0.05	2.19136e-203	Venous_1
AC027031.2	2.94088e-206	0.578974	0.427	0.141	7.48512e-202	Venous_1
SLITRK5	2.10626e-202	0.352658	0.21	0.034	5.36085e-198	Venous_1
ACTC1	1.40241e-200	0.682666	0.232	0.043	3.5694e-196	Venous_1
SLC27A3	1.5042e-196	0.72194	0.568	0.252	3.82849e-192	Venous_1
TBX3	5.23403e-188	0.634593	0.408	0.139	1.33217e-183	Venous_1
NENF	4.82201e-183	0.853153	0.729	0.462	1.2273e-178	Venous_1
OIT3	3.41184e-182	0.534897	0.249	0.054	8.68381e-178	Venous_1
SC5D	2.78367e-163	0.836152	0.787	0.542	7.08501e-159	Venous_1
FAT4	1.61054e-156	0.508369	0.409	0.156	4.09915e-152	Venous_1
CCDC80	9.08373e-154	0.704581	0.439	0.172	2.31199e-149	Venous_1
PRCP	1.73567e-153	0.64434	0.888	0.676	4.41763e-149	Venous_1
CAV1	2.48539e-149	0.755211	0.517	0.253	6.32581e-145	Venous_1
PITX2	5.86463e-149	0.29067	0.218	0.05	1.49267e-144	Venous_1
ZNF770	5.11475e-146	0.678073	0.547	0.294	1.30181e-141	Venous_1
RDX	9.89383e-146	0.620317	0.977	0.911	2.51818e-141	Venous_1
COL15A1	2.08945e-143	0.473486	0.314	0.101	5.31806e-139	Venous_1
SLC18A1	2.44321e-143	0.294952	0.214	0.05	6.21846e-139	Venous_1
RAMP2	1.84055e-141	0.561913	0.989	0.891	4.68456e-137	Venous_1
COL6A2	5.54136e-134	0.562339	0.859	0.643	1.41039e-129	Venous_1
S100A10	6.8733e-133	0.566973	0.987	0.939	1.74939e-128	Venous_1
S100Z	5.0358e-132	0.304458	0.21	0.051	1.28171e-127	Venous_1
LINC00305	2.30299e-129	0.419377	0.161	0.031	5.86156e-125	Venous_1
ITGB1	1.81887e-126	0.433788	0.998	0.97	4.62939e-122	Venous_1
GBP4	2.73777e-125	0.411687	0.279	0.089	6.96816e-121	Venous_1
RFK	7.16585e-124	0.642648	0.621	0.379	1.82385e-119	Venous_1
SMAD9	1.50443e-119	0.308861	0.298	0.103	3.82907e-115	Venous_1
SLC38A2	2.22286e-119	0.627154	0.746	0.52	5.65763e-115	Venous_1
COL5A2	2.28255e-119	0.556709	0.816	0.57	5.80954e-115	Venous_1
CPNE2	3.12321e-118	0.507005	0.644	0.392	7.94919e-114	Venous_1
IFITM3	9.2638e-118	0.465142	0.998	0.994	2.35782e-113	Venous_1
COL6A1	1.97906e-116	0.628014	0.721	0.489	5.03711e-112	Venous_1
CALCRL	2.94416e-115	0.599412	0.698	0.468	7.49349e-111	Venous_1
SLC19A3	3.04031e-115	0.383115	0.274	0.093	7.73821e-111	Venous_1
SEMA6A	4.72344e-113	0.478897	0.549	0.298	1.20221e-108	Venous_1
BAMBI	2.11471e-111	0.617184	0.671	0.44	5.38237e-107	Venous_1
FBN1	3.5211e-111	0.335597	0.257	0.084	8.96191e-107	Venous_1
EDN1	3.66655e-111	0.360697	0.138	0.026	9.33209e-107	Venous_1
GAP43	3.61983e-110	0.433506	0.296	0.109	9.2132e-106	Venous_1
STX3	1.95605e-108	0.565344	0.652	0.423	4.97854e-104	Venous_1
XACT	3.49953e-108	0.331168	0.256	0.084	8.90701e-104	Venous_1
MS4A4A	3.66827e-107	0.401888	0.248	0.081	9.33647e-103	Venous_1
CYB5A	3.01472e-105	0.602625	0.693	0.496	7.67307e-101	Venous_1
PVR	1.39802e-103	0.346808	0.297	0.113	3.55823e-99	Venous_1
COL4A2	1.42986e-103	0.550665	0.808	0.623	3.63929e-99	Venous_1
NT5E	4.95213e-103	0.389618	0.377	0.167	1.26042e-98	Venous_1
NPR1	1.14311e-102	0.345987	0.343	0.143	2.90943e-98	Venous_1
SERPINH1	1.23869e-101	0.407884	0.971	0.901	3.1527e-97	Venous_1
TAX1BP1	1.64967e-99	0.500277	0.791	0.621	4.19874e-95	Venous_1
CSRP2	2.96039e-98	0.680878	0.699	0.513	7.53479e-94	Venous_1
PCAT19	3.02266e-96	0.402495	0.487	0.256	7.69327e-92	Venous_1
IMPAD1	1.46669e-95	0.523349	0.614	0.403	3.73302e-91	Venous_1
ADAMTS1	1.82539e-95	0.52461	0.3	0.122	4.64598e-91	Venous_1
F2R	5.93645e-95	0.500482	0.867	0.71	1.51095e-90	Venous_1
PIP4K2A	1.02751e-94	0.441927	0.595	0.376	2.61523e-90	Venous_1
RNASE1	2.1394e-93	0.546482	0.85	0.7	5.4452e-89	Venous_1
COL4A1	9.91765e-92	0.589757	0.726	0.53	2.52424e-87	Venous_1
TM4SF18	1.09414e-91	0.390124	0.399	0.192	2.78482e-87	Venous_1
MRC2	2.83436e-89	0.43949	0.577	0.357	7.21401e-85	Venous_1
SERF2	1.22251e-85	0.309815	1	1	3.11153e-81	Venous_1
DLK1	1.58116e-82	0.703979	0.49	0.281	4.02436e-78	Venous_1
SDCBP	2.89684e-81	0.4333	0.869	0.736	7.37303e-77	Venous_1
TM4SF1	8.98636e-81	0.708523	0.628	0.426	2.28721e-76	Venous_1
PLAAT3	5.25726e-80	0.447651	0.689	0.478	1.33808e-75	Venous_1
CPXM1	6.31319e-80	0.482866	0.681	0.5	1.60683e-75	Venous_1
RAP1B	1.45081e-79	0.379733	0.935	0.863	3.69261e-75	Venous_1
CLDN5	8.70435e-79	0.558819	0.252	0.101	2.21543e-74	Venous_1
FLRT2	1.51225e-77	0.289349	0.337	0.155	3.84897e-73	Venous_1
ARMCX2	8.61825e-77	0.414412	0.604	0.398	2.19352e-72	Venous_1
LRIG3	3.71611e-75	0.335333	0.402	0.209	9.45825e-71	Venous_1
RRBP1	1.39507e-72	0.378636	0.883	0.747	3.55072e-68	Venous_1
CSRNP3	1.6658e-72	0.275254	0.275	0.121	4.2398e-68	Venous_1
TSPAN13	6.74142e-72	0.339011	0.424	0.234	1.71583e-67	Venous_1
PAQR8	4.41834e-71	0.271116	0.284	0.128	1.12456e-66	Venous_1
WARS	2.69458e-70	0.27679	0.324	0.157	6.85823e-66	Venous_1
PALLD	6.52033e-69	0.293438	0.285	0.13	1.65955e-64	Venous_1
NRGN	1.01348e-67	0.325192	0.304	0.146	2.5795e-63	Venous_1
LRP11	5.58535e-67	0.277777	0.284	0.132	1.42158e-62	Venous_1
WWTR1	1.07966e-66	0.35369	0.531	0.332	2.74794e-62	Venous_1
H19	1.17713e-66	0.53138	0.619	0.42	2.99603e-62	Venous_1
FN1	5.15593e-66	0.575598	0.763	0.586	1.31229e-61	Venous_1
PECAM1	2.7904e-65	0.399701	0.729	0.563	7.10212e-61	Venous_1
MEF2C	4.02825e-65	0.386366	0.855	0.704	1.02527e-60	Venous_1
AP1S2	4.2825e-65	0.418814	0.791	0.644	1.08998e-60	Venous_1
PROCR	4.83917e-65	0.492504	0.857	0.729	1.23167e-60	Venous_1
PLTP	1.32701e-64	0.388615	0.696	0.517	3.37751e-60	Venous_1
PPIC	1.72388e-64	0.296047	0.385	0.209	4.38763e-60	Venous_1
JAM3	2.27177e-64	0.433528	0.725	0.568	5.78211e-60	Venous_1
CLCN5	2.2437e-63	0.331605	0.317	0.162	5.71065e-59	Venous_1
BEX1	5.10748e-63	0.464629	0.682	0.493	1.29996e-58	Venous_1
FCN3	5.4778e-63	0.470004	0.55	0.353	1.39421e-58	Venous_1
MRI1	1.6392e-62	0.313413	0.304	0.152	4.17208e-58	Venous_1
ANXA1	2.42105e-62	0.288278	0.313	0.153	6.16207e-58	Venous_1
PCDH10	7.50479e-62	0.331202	0.381	0.208	1.91012e-57	Venous_1
TMSB10	6.92502e-61	0.275881	1	0.999	1.76256e-56	Venous_1
APLNR	1.16877e-60	0.398173	0.532	0.337	2.97477e-56	Venous_1
DDHD1	3.52028e-60	0.347406	0.358	0.196	8.95983e-56	Venous_1
ARHGEF12	4.46996e-60	0.325134	0.506	0.323	1.13769e-55	Venous_1
EMCN	5.265e-60	0.417211	0.408	0.233	1.34005e-55	Venous_1
FCGRT	4.92344e-59	0.339345	0.478	0.301	1.25311e-54	Venous_1
LDB2	1.17123e-57	0.339655	0.644	0.45	2.98101e-53	Venous_1
MYO6	9.61142e-56	0.352762	0.643	0.464	2.4463e-51	Venous_1
NNAT	1.37723e-55	0.863629	0.536	0.392	3.50533e-51	Venous_1
ENG	2.5117e-55	0.314342	0.452	0.279	6.39279e-51	Venous_1
ID1	6.60797e-54	0.346528	0.954	0.858	1.68186e-49	Venous_1
CCDC85B	1.2509e-53	0.332599	0.885	0.817	3.18379e-49	Venous_1
GSTO1	3.83158e-53	0.326321	0.981	0.964	9.75215e-49	Venous_1
CREM	6.62187e-52	0.419373	0.61	0.447	1.6854e-47	Venous_1
PCAT14	1.58771e-51	0.341798	0.307	0.164	4.04105e-47	Venous_1
SOX17	1.96112e-51	0.315579	0.384	0.219	4.99144e-47	Venous_1
FOS	2.10825e-51	0.357788	0.364	0.211	5.36593e-47	Venous_1
SPATS2L	5.09964e-50	0.267812	0.455	0.285	1.29796e-45	Venous_1
SLC16A1	1.12294e-49	0.370931	0.717	0.576	2.85811e-45	Venous_1
SMAD6	4.29504e-45	0.299774	0.48	0.321	1.09317e-40	Venous_1
FNIP2	9.60589e-45	0.318489	0.422	0.274	2.44489e-40	Venous_1
STOM	2.87639e-44	0.292008	0.454	0.304	7.32098e-40	Venous_1
PACC1	5.15084e-44	0.265552	0.311	0.178	1.31099e-39	Venous_1
CDH13	3.10546e-43	0.250962	0.39	0.24	7.90402e-39	Venous_1
ADCY4	5.15076e-43	0.288196	0.591	0.426	1.31097e-38	Venous_1
SEPTIN6	1.01565e-42	0.331268	0.698	0.557	2.58504e-38	Venous_1
MGST3	3.10825e-42	0.310295	0.915	0.875	7.91112e-38	Venous_1
FNDC3B	1.92836e-41	0.26597	0.481	0.33	4.90807e-37	Venous_1
DAB2	5.72791e-41	0.278698	0.494	0.343	1.45787e-36	Venous_1
BMPR2	2.01476e-40	0.273739	0.553	0.399	5.12796e-36	Venous_1
SNHG14	3.76946e-40	0.331732	0.829	0.738	9.59403e-36	Venous_1
DUSP5	3.54508e-38	0.315587	0.533	0.394	9.02295e-34	Venous_1
TPST2	6.92146e-38	0.278344	0.72	0.598	1.76165e-33	Venous_1
JUN	1.88963e-37	0.353669	0.54	0.4	4.80948e-33	Venous_1
CALD1	3.62629e-37	0.322314	0.834	0.753	9.22963e-33	Venous_1
TFPI	6.5431e-37	0.252034	0.986	0.925	1.66535e-32	Venous_1
CD24	5.34704e-35	0.332853	0.903	0.861	1.36093e-30	Venous_1
EDIL3	5.49867e-35	0.356458	0.636	0.51	1.39952e-30	Venous_1
CD40	2.61349e-34	0.253501	0.63	0.484	6.65186e-30	Venous_1
IL6ST	1.63315e-33	0.281783	0.704	0.578	4.15669e-29	Venous_1
BLCAP	1.91929e-33	0.260383	0.557	0.422	4.88497e-29	Venous_1
APPL1	1.74882e-32	0.290636	0.576	0.462	4.45111e-28	Venous_1
TMEM88	2.61719e-32	0.259731	0.507	0.37	6.66127e-28	Venous_1
CAPNS1	3.84505e-32	0.252192	0.682	0.571	9.78643e-28	Venous_1
OXR1	8.51469e-32	0.259785	0.421	0.298	2.16716e-27	Venous_1
SLC44A1	1.4299e-31	0.291343	0.682	0.569	3.63938e-27	Venous_1
CD34	3.3212e-31	0.265685	0.817	0.745	8.45312e-27	Venous_1
MAGED1	3.64246e-30	0.26088	0.737	0.62	9.2708e-26	Venous_1
ARMCX6	1.65025e-28	0.272113	0.571	0.451	4.2002e-24	Venous_1
LY6E	3.6704e-28	0.26209	0.671	0.564	9.34191e-24	Venous_1
HLA-DQB1	2.91249e-26	0.286262	0.408	0.292	7.41286e-22	Venous_1
SMS	3.30777e-26	0.299705	0.879	0.852	8.41894e-22	Venous_1
TRAPPC5	2.8727e-25	0.250328	0.706	0.615	7.31158e-21	Venous_1
F2RL2	1.26952e-24	0.256351	0.593	0.482	3.23117e-20	Venous_1
S100A6	3.79606e-11	0.278481	0.665	0.625	9.66173e-07	Venous_1
RUNX1	0	0.920834	0.708	0.188	0	EHT_1
NPM1	1.71812e-244	0.581882	1	1	4.37295e-240	EHT_1
MYCN	1.25825e-241	0.662403	0.45	0.118	3.20249e-237	EHT_1
RPS2	1.83401e-237	0.450494	1	1	4.66791e-233	EHT_1
EEF1B2	1.59855e-225	0.650806	0.999	0.994	4.06863e-221	EHT_1
GYPB	2.34082e-222	0.715967	0.265	0.042	5.95785e-218	EHT_1
SPI1	3.18765e-219	0.438851	0.228	0.031	8.1132e-215	EHT_1
LDHB	2.49108e-217	0.601539	0.997	0.983	6.3403e-213	EHT_1
CCND3	6.48443e-207	0.726008	0.606	0.237	1.65042e-202	EHT_1
NFE2	2.12229e-199	0.26372	0.197	0.025	5.40166e-195	EHT_1
RPLP0	8.88961e-199	0.387396	1	1	2.26258e-194	EHT_1
ITGA2B	2.09859e-191	0.393817	0.266	0.049	5.34134e-187	EHT_1
HSPD1	8.88559e-190	0.636242	0.993	0.96	2.26156e-185	EHT_1
RPL23A	1.28755e-189	0.416734	1	1	3.27707e-185	EHT_1
NME2	6.58076e-187	0.530999	0.998	0.995	1.67493e-182	EHT_1
FAM30A	4.69923e-183	0.497587	0.246	0.044	1.19605e-178	EHT_1
CLEC11A	1.47695e-181	0.869044	0.814	0.507	3.75912e-177	EHT_1
NME1	6.14124e-181	0.741437	0.825	0.515	1.56307e-176	EHT_1
GYPE	4.80005e-178	0.439344	0.22	0.035	1.22171e-173	EHT_1
HNRNPA1	3.2186e-176	0.580143	0.999	0.978	8.19198e-172	EHT_1
PPA1	7.95936e-176	0.69134	0.783	0.452	2.02582e-171	EHT_1
GATA1	1.82301e-175	0.377401	0.205	0.031	4.63993e-171	EHT_1
SERBP1	1.2588e-174	0.537816	0.997	0.974	3.20391e-170	EHT_1
RPS6	1.91172e-173	0.480732	1	1	4.86572e-169	EHT_1
MYB	1.86356e-172	0.403208	0.343	0.088	4.74314e-168	EHT_1
SNHG29	3.93435e-171	0.539255	0.999	0.992	1.00137e-166	EHT_1
RPL12	4.47976e-169	0.408989	1	1	1.14019e-164	EHT_1
RPS3	2.12331e-166	0.363514	1	1	5.40424e-162	EHT_1
CENPV	1.73711e-165	0.646889	0.753	0.406	4.42128e-161	EHT_1
NCL	8.68932e-165	0.767598	0.982	0.934	2.21161e-160	EHT_1
NKG7	1.95796e-163	0.398159	0.218	0.039	4.98341e-159	EHT_1
SNHG8	8.56014e-162	0.672918	0.865	0.586	2.17873e-157	EHT_1
ARHGDIB	2.18676e-158	0.746484	0.807	0.497	5.56574e-154	EHT_1
C1QBP	1.41875e-157	0.707019	0.899	0.703	3.61101e-153	EHT_1
APRT	4.0208e-156	0.640373	0.914	0.699	1.02337e-151	EHT_1
RPL13A	1.02163e-153	0.341441	1	1	2.60024e-149	EHT_1
RPL3	1.34783e-150	0.323975	1	1	3.4305e-146	EHT_1
PTMA	1.70006e-144	0.471298	1	1	4.327e-140	EHT_1
KLF1	6.11068e-143	0.288961	0.196	0.035	1.55529e-138	EHT_1
FABP5	5.10598e-141	0.722838	0.861	0.619	1.29957e-136	EHT_1
TYROBP	1.61397e-138	0.290653	0.15	0.021	4.10787e-134	EHT_1
RPL4	1.06056e-137	0.388078	1	0.999	2.69934e-133	EHT_1
TKT	2.40154e-137	0.511927	0.987	0.925	6.1124e-133	EHT_1
SMIM1	3.25886e-134	0.490037	0.381	0.132	8.29446e-130	EHT_1
RPL41	4.31067e-133	0.329016	1	1	1.09715e-128	EHT_1
HMGA1	2.01754e-132	0.518568	0.984	0.901	5.13504e-128	EHT_1
GCSH	1.00121e-131	0.555898	0.776	0.479	2.54827e-127	EHT_1
MYL4	5.38963e-131	1.09009	0.403	0.154	1.37177e-126	EHT_1
RPL7A	2.48559e-130	0.307398	1	1	6.32634e-126	EHT_1
UQCRH	1.73836e-129	0.429077	0.999	0.993	4.42448e-125	EHT_1
DKC1	3.81341e-129	0.560869	0.732	0.435	9.70588e-125	EHT_1
RPS23	2.22586e-127	0.292644	1	1	5.66527e-123	EHT_1
EIF5A	7.51717e-126	0.619016	0.885	0.708	1.91327e-121	EHT_1
MGST1	9.08039e-125	0.475738	0.577	0.271	2.31114e-120	EHT_1
FCER1G	1.80958e-124	0.526982	0.588	0.278	4.60575e-120	EHT_1
CD44	2.81579e-121	0.716728	0.647	0.357	7.16675e-117	EHT_1
BTK	9.19044e-121	0.591218	0.564	0.277	2.33915e-116	EHT_1
ALAS2	9.83311e-121	0.872819	0.218	0.051	2.50272e-116	EHT_1
PA2G4	9.89225e-121	0.5577	0.91	0.765	2.51777e-116	EHT_1
APEX1	1.88936e-120	0.543246	0.923	0.743	4.8088e-116	EHT_1
RPS8	2.40338e-120	0.278882	1	1	6.11709e-116	EHT_1
SNRPD1	8.55537e-120	0.541457	0.958	0.88	2.17751e-115	EHT_1
RACK1	1.26472e-119	0.316196	1	1	3.21897e-115	EHT_1
MPZL2	8.79223e-116	0.361112	0.108	0.013	2.2378e-111	EHT_1
RPS18	1.4285e-113	0.291234	1	1	3.63582e-109	EHT_1
RPL13	3.59602e-112	0.264748	1	1	9.15259e-108	EHT_1
SNHG3	4.60257e-112	0.534535	0.579	0.305	1.17145e-107	EHT_1
RPS12	3.62275e-111	0.281639	1	1	9.22062e-107	EHT_1
RPS24	1.53995e-109	0.296379	1	1	3.91948e-105	EHT_1
SNRPF	1.93462e-109	0.466804	0.971	0.901	4.92398e-105	EHT_1
IMPDH2	2.004e-107	0.498312	0.928	0.762	5.10059e-103	EHT_1
RPL19	4.79506e-107	0.274954	1	1	1.22044e-102	EHT_1
RGS10	8.8272e-107	0.532194	0.717	0.429	2.2467e-102	EHT_1
RPS5	1.35099e-106	0.300554	1	1	3.43853e-102	EHT_1
RPL10A	2.47103e-106	0.314317	1	1	6.28927e-102	EHT_1
TXN	3.03832e-106	0.427728	0.994	0.975	7.73312e-102	EHT_1
TFDP2	1.71333e-105	0.524941	0.623	0.356	4.36076e-101	EHT_1
LYZ	3.25064e-105	0.301942	0.244	0.068	8.27352e-101	EHT_1
RPL18A	1.53115e-103	0.275087	1	1	3.89707e-99	EHT_1
CMTM5	3.58027e-103	0.312514	0.249	0.073	9.11251e-99	EHT_1
RPL7	6.66959e-103	0.310373	1	1	1.69754e-98	EHT_1
MRPS26	2.29181e-101	0.504437	0.822	0.597	5.83311e-97	EHT_1
RAN	3.08034e-101	0.419547	0.991	0.962	7.84007e-97	EHT_1
NOP16	1.03886e-100	0.376467	0.418	0.179	2.64411e-96	EHT_1
EIF4A1	1.28076e-100	0.330127	1	1	3.2598e-96	EHT_1
RPL35	1.87456e-100	0.281315	1	1	4.77114e-96	EHT_1
RPS9	2.5294e-99	0.269622	1	1	6.43783e-95	EHT_1
MAPKAPK3	1.22909e-97	0.324726	0.35	0.134	3.12829e-93	EHT_1
NDUFS5	1.46249e-97	0.386026	0.998	0.978	3.72233e-93	EHT_1
RSL1D1	1.10174e-96	0.470606	0.822	0.597	2.80414e-92	EHT_1
NOP56	6.11463e-96	0.495768	0.792	0.57	1.5563e-91	EHT_1
C20orf27	1.53204e-94	0.405603	0.545	0.282	3.89936e-90	EHT_1
RPS15	6.1405e-94	0.256209	1	1	1.56288e-89	EHT_1
SNHG16	7.18937e-93	0.477964	0.904	0.762	1.82984e-88	EHT_1
RPSA	3.07486e-92	0.281301	1	1	7.82614e-88	EHT_1
FKBP4	1.77265e-91	0.49393	0.715	0.474	4.51176e-87	EHT_1
RPL36A	2.59283e-89	0.345855	1	1	6.59927e-85	EHT_1
COA4	3.29308e-88	0.450849	0.732	0.487	8.38156e-84	EHT_1
SET	4.05585e-88	0.380454	0.996	0.988	1.0323e-83	EHT_1
LYAR	6.63024e-88	0.419887	0.593	0.337	1.68753e-83	EHT_1
CCT8	1.02299e-86	0.39415	0.975	0.909	2.6037e-82	EHT_1
DNPH1	1.65532e-86	0.41354	0.608	0.355	4.21313e-82	EHT_1
DUT	2.21091e-86	0.525862	0.772	0.54	5.6272e-82	EHT_1
SLC25A5	4.05737e-86	0.408942	0.995	0.991	1.03268e-81	EHT_1
TRGC1	3.29525e-85	0.255401	0.109	0.018	8.38707e-81	EHT_1
TOP1MT	7.17286e-85	0.325845	0.376	0.161	1.82564e-80	EHT_1
FAM216A	1.73113e-84	0.316591	0.38	0.164	4.40606e-80	EHT_1
YDJC	1.7987e-84	0.319002	0.389	0.171	4.57805e-80	EHT_1
RASGRP2	2.17266e-84	0.318785	0.314	0.121	5.52986e-80	EHT_1
RPL22L1	2.8113e-83	0.576345	0.818	0.632	7.15532e-79	EHT_1
ATIC	8.50201e-83	0.375846	0.486	0.252	2.16393e-78	EHT_1
RPS25	9.98046e-83	0.252371	1	1	2.54023e-78	EHT_1
SRM	1.17504e-82	0.451157	0.698	0.457	2.99072e-78	EHT_1
IQGAP2	8.68998e-82	0.476936	0.652	0.405	2.21177e-77	EHT_1
GABPB1-AS1	2.81534e-81	0.485275	0.612	0.375	7.16561e-77	EHT_1
DDX21	2.86116e-81	0.476741	0.811	0.61	7.28222e-77	EHT_1
GABRE	3.10034e-81	0.372033	0.348	0.148	7.89099e-77	EHT_1
HSPE1	5.72578e-81	0.484109	0.947	0.88	1.45733e-76	EHT_1
TFRC	7.41025e-81	0.280947	0.262	0.092	1.88606e-76	EHT_1
SNHG15	9.57578e-81	0.391619	0.533	0.293	2.43723e-76	EHT_1
MCM4	1.23878e-80	0.376742	0.341	0.143	3.15295e-76	EHT_1
GNL3	1.28079e-80	0.435019	0.758	0.538	3.25986e-76	EHT_1
C19orf48	2.09711e-80	0.358515	0.51	0.267	5.33755e-76	EHT_1
RNASET2	7.75146e-80	0.417786	0.553	0.319	1.9729e-75	EHT_1
GMPR	9.90233e-80	0.40627	0.35	0.152	2.52034e-75	EHT_1
MTHFD2	2.63093e-79	0.367692	0.546	0.301	6.69624e-75	EHT_1
NASP	4.51055e-79	0.532944	0.816	0.6	1.14802e-74	EHT_1
LCP1	1.35512e-78	0.292603	0.156	0.039	3.44905e-74	EHT_1
CRYM	7.34136e-78	0.448187	0.264	0.097	1.86852e-73	EHT_1
PPIA	9.88929e-78	0.292982	0.999	0.999	2.51702e-73	EHT_1
TOMM5	3.56112e-77	0.447189	0.884	0.738	9.06377e-73	EHT_1
RPS17	5.67818e-77	0.307047	1	1	1.44521e-72	EHT_1
HNRNPAB	6.57081e-76	0.4811	0.811	0.622	1.6724e-71	EHT_1
PAPSS1	6.73445e-76	0.481639	0.654	0.423	1.71405e-71	EHT_1
EEF1E1	1.43366e-75	0.373345	0.631	0.39	3.64896e-71	EHT_1
STK26	1.79356e-75	0.378911	0.526	0.292	4.56498e-71	EHT_1
SLIRP	2.9876e-73	0.419734	0.882	0.734	7.60403e-69	EHT_1
LARS	3.21996e-73	0.411539	0.74	0.515	8.19543e-69	EHT_1
WDR43	4.68287e-73	0.382131	0.56	0.331	1.19188e-68	EHT_1
GAS5	5.09514e-73	0.432665	0.991	0.973	1.29682e-68	EHT_1
BID	1.5597e-72	0.395118	0.603	0.376	3.96976e-68	EHT_1
MDH2	4.12707e-72	0.408068	0.913	0.788	1.05042e-67	EHT_1
PAICS	4.59568e-72	0.400336	0.754	0.543	1.16969e-67	EHT_1
ICAM4	9.59435e-72	0.273185	0.304	0.124	2.44195e-67	EHT_1
CCT5	2.0267e-71	0.408489	0.903	0.761	5.15835e-67	EHT_1
ANP32B	2.84725e-71	0.356228	0.98	0.936	7.24682e-67	EHT_1
EXOSC5	5.90363e-71	0.307535	0.426	0.215	1.50259e-66	EHT_1
FAM136A	2.66321e-69	0.378609	0.615	0.392	6.7784e-65	EHT_1
AIF1	1.17657e-68	0.590936	0.499	0.288	2.99461e-64	EHT_1
GAD1	1.58023e-68	0.677288	0.461	0.262	4.022e-64	EHT_1
TALDO1	1.71701e-68	0.431073	0.772	0.573	4.37014e-64	EHT_1
NT5M	1.93981e-68	0.250701	0.253	0.096	4.9372e-64	EHT_1
CNBP	1.98427e-68	0.361089	0.933	0.81	5.05036e-64	EHT_1
MRTO4	4.82384e-68	0.35849	0.557	0.335	1.22776e-63	EHT_1
UNG	1.14732e-67	0.349729	0.378	0.186	2.92016e-63	EHT_1
SNHG1	1.50568e-67	0.35776	0.53	0.307	3.83225e-63	EHT_1
CEBPB	2.25958e-67	0.397481	0.595	0.364	5.75109e-63	EHT_1
AKR1C1	2.5793e-67	0.252329	0.156	0.043	6.56484e-63	EHT_1
SSB	4.67311e-67	0.367223	0.96	0.874	1.1894e-62	EHT_1
UTP14A	6.99962e-67	0.295515	0.443	0.229	1.78154e-62	EHT_1
HMGN5	1.24103e-66	0.346071	0.434	0.225	3.15867e-62	EHT_1
RFLNB	2.65649e-66	0.56208	0.449	0.252	6.7613e-62	EHT_1
TMEM97	3.43733e-66	0.368235	0.641	0.412	8.74869e-62	EHT_1
RAC2	5.96612e-66	0.363087	0.422	0.223	1.5185e-61	EHT_1
ISYNA1	1.23731e-65	0.383821	0.708	0.483	3.1492e-61	EHT_1
SNRPE	1.57386e-65	0.327801	0.977	0.926	4.00579e-61	EHT_1
CCT7	4.23797e-65	0.373899	0.857	0.696	1.07865e-60	EHT_1
CCT2	3.81021e-64	0.355167	0.92	0.8	9.69775e-60	EHT_1
PRKAR2B	1.05692e-63	0.343488	0.251	0.099	2.69008e-59	EHT_1
SRGN	1.13429e-63	0.529529	0.135	0.035	2.88699e-59	EHT_1
GIHCG	1.15188e-63	0.316808	0.39	0.197	2.93176e-59	EHT_1
TRAP1	1.73218e-63	0.365376	0.664	0.457	4.40874e-59	EHT_1
GPATCH4	2.06664e-63	0.281674	0.356	0.169	5.26e-59	EHT_1
CTSC	1.27723e-62	0.383301	0.805	0.606	3.2508e-58	EHT_1
DCTPP1	3.1723e-62	0.379309	0.576	0.367	8.07414e-58	EHT_1
CLNS1A	3.61271e-62	0.356086	0.791	0.594	9.19507e-58	EHT_1
PABPC1	3.6414e-62	0.315141	0.991	0.985	9.26809e-58	EHT_1
MRPL12	8.14455e-62	0.356956	0.606	0.393	2.07295e-57	EHT_1
YBX3	8.53759e-62	0.365482	0.945	0.878	2.17299e-57	EHT_1
RANBP1	1.60113e-61	0.413661	0.903	0.784	4.07521e-57	EHT_1
MCM7	6.55677e-61	0.394979	0.481	0.273	1.66883e-56	EHT_1
FERMT3	7.70461e-61	0.312668	0.281	0.121	1.96098e-56	EHT_1
SMARCC1	8.59672e-61	0.380892	0.806	0.625	2.18804e-56	EHT_1
PNN	1.12186e-60	0.41567	0.868	0.752	2.85535e-56	EHT_1
DLK1	1.18618e-60	0.539486	0.494	0.288	3.01906e-56	EHT_1
SRPK1	1.232e-60	0.332996	0.567	0.348	3.13568e-56	EHT_1
NHP2	1.41778e-60	0.37016	0.787	0.613	3.60853e-56	EHT_1
CTSH	1.67669e-60	0.289822	0.339	0.162	4.26752e-56	EHT_1
CYCS	7.5792e-60	0.425108	0.778	0.605	1.92906e-55	EHT_1
TMA16	1.08121e-59	0.33298	0.565	0.355	2.75191e-55	EHT_1
ATP5MC1	1.19788e-59	0.405862	0.772	0.58	3.04884e-55	EHT_1
MCM3	1.51486e-59	0.375503	0.452	0.255	3.85563e-55	EHT_1
CCT3	4.45893e-59	0.332874	0.931	0.833	1.13489e-54	EHT_1
RPS26	5.41163e-59	0.316725	0.995	0.985	1.37737e-54	EHT_1
COX5A	5.57831e-59	0.340688	0.961	0.901	1.41979e-54	EHT_1
QPRT	2.08487e-58	0.417171	0.829	0.663	5.30641e-54	EHT_1
CST3	4.59626e-58	0.429469	0.822	0.655	1.16984e-53	EHT_1
NOLC1	5.95892e-58	0.320483	0.47	0.269	1.51666e-53	EHT_1
ZFAS1	1.79473e-57	0.297197	1	0.998	4.56795e-53	EHT_1
PPIF	5.11639e-57	0.321989	0.441	0.25	1.30222e-52	EHT_1
EIF3E	6.3532e-57	0.287866	0.998	0.989	1.61702e-52	EHT_1
TAGLN2	6.69e-57	0.348222	0.898	0.756	1.70274e-52	EHT_1
PSMG4	1.41105e-56	0.29735	0.413	0.224	3.59141e-52	EHT_1
NOP58	1.92786e-56	0.354123	0.641	0.434	4.9068e-52	EHT_1
GTF3A	5.75548e-56	0.351778	0.663	0.469	1.46488e-51	EHT_1
RBFA	1.61984e-55	0.289115	0.444	0.251	4.12282e-51	EHT_1
RAB3C	1.80758e-55	0.27525	0.424	0.228	4.60065e-51	EHT_1
MTAP	7.63598e-55	0.295351	0.434	0.243	1.94351e-50	EHT_1
YBX1	2.10299e-54	0.251899	0.999	0.999	5.35254e-50	EHT_1
ADSL	3.96045e-54	0.329177	0.573	0.373	1.00801e-49	EHT_1
SSBP1	1.13219e-53	0.347946	0.862	0.734	2.88166e-49	EHT_1
EIF3M	2.76281e-53	0.325542	0.924	0.842	7.0319e-49	EHT_1
AHCY	3.44846e-53	0.315057	0.775	0.584	8.77702e-49	EHT_1
CELF2	1.08685e-52	0.260165	0.282	0.129	2.76624e-48	EHT_1
GGCT	1.43177e-52	0.329292	0.676	0.482	3.64415e-48	EHT_1
ITPA	2.65721e-52	0.298263	0.57	0.364	6.76313e-48	EHT_1
TIMM8B	5.58237e-52	0.31792	0.638	0.438	1.42083e-47	EHT_1
SRSF7	7.02249e-51	0.37191	0.888	0.774	1.78736e-46	EHT_1
MYC	7.9242e-51	0.440903	0.283	0.137	2.01687e-46	EHT_1
MRPS34	8.73534e-51	0.341122	0.72	0.544	2.22332e-46	EHT_1
CITED2	1.192e-50	0.327539	0.394	0.218	3.03387e-46	EHT_1
PUM3	1.53898e-50	0.322697	0.535	0.344	3.91701e-46	EHT_1
GCHFR	5.28554e-50	0.312467	0.306	0.15	1.34527e-45	EHT_1
OLA1	1.42045e-49	0.32259	0.707	0.518	3.61534e-45	EHT_1
CKB	1.97389e-49	0.466184	0.428	0.253	5.02395e-45	EHT_1
C1QTNF4	3.74905e-49	0.376755	0.353	0.19	9.54208e-45	EHT_1
MCM5	4.18116e-49	0.26239	0.319	0.158	1.06419e-44	EHT_1
NOB1	4.80733e-49	0.284886	0.574	0.373	1.22356e-44	EHT_1
RUVBL1	8.35812e-49	0.307103	0.546	0.353	2.12731e-44	EHT_1
GMPS	4.36565e-48	0.313786	0.731	0.551	1.11114e-43	EHT_1
GINS2	4.62873e-48	0.267603	0.299	0.144	1.17811e-43	EHT_1
HNRNPF	7.78609e-48	0.300743	0.905	0.79	1.98172e-43	EHT_1
MRPL4	1.91382e-47	0.344843	0.67	0.514	4.87105e-43	EHT_1
ABCE1	1.94541e-47	0.307919	0.637	0.451	4.95146e-43	EHT_1
PSMG1	2.02972e-47	0.27116	0.508	0.316	5.16604e-43	EHT_1
PEBP1	2.43779e-47	0.333915	0.884	0.771	6.20465e-43	EHT_1
PRKDC	4.24212e-47	0.361251	0.807	0.659	1.0797e-42	EHT_1
HSD17B4	5.4913e-47	0.364308	0.567	0.385	1.39765e-42	EHT_1
TXNIP	9.10718e-47	0.43342	0.963	0.925	2.31796e-42	EHT_1
NDUFAF2	1.39879e-46	0.286277	0.62	0.426	3.56019e-42	EHT_1
SNHG32	3.4264e-46	0.32106	0.839	0.679	8.72089e-42	EHT_1
MRPL3	4.37571e-46	0.285496	0.554	0.365	1.11371e-41	EHT_1
IARS	1.06414e-45	0.288881	0.517	0.329	2.70844e-41	EHT_1
MSH6	1.32957e-45	0.361375	0.525	0.353	3.38403e-41	EHT_1
LSM7	1.82585e-45	0.29257	0.945	0.879	4.64716e-41	EHT_1
MRPS25	3.64832e-45	0.251325	0.413	0.24	9.28569e-41	EHT_1
TMEM14B	9.73104e-45	0.313915	0.671	0.488	2.47675e-40	EHT_1
ZMYND8	1.32398e-44	0.375755	0.718	0.551	3.36979e-40	EHT_1
HSPA9	2.36019e-44	0.316306	0.807	0.658	6.00716e-40	EHT_1
ADA	2.50934e-44	0.332581	0.686	0.506	6.38678e-40	EHT_1
LY6E	3.40477e-44	0.317993	0.739	0.561	8.66582e-40	EHT_1
PDCD2	5.06798e-44	0.291577	0.623	0.446	1.2899e-39	EHT_1
UROD	1.14211e-43	0.331768	0.509	0.333	2.90689e-39	EHT_1
CD320	1.87153e-43	0.251565	0.466	0.283	4.76342e-39	EHT_1
ATP5F1A	2.14578e-43	0.295017	0.937	0.869	5.46143e-39	EHT_1
ATP5F1D	2.38578e-43	0.294756	0.918	0.83	6.07228e-39	EHT_1
CENPH	2.76033e-43	0.258091	0.473	0.288	7.02559e-39	EHT_1
BCCIP	3.3748e-43	0.25225	0.493	0.311	8.58953e-39	EHT_1
CCNB1IP1	1.89253e-42	0.327226	0.914	0.807	4.81688e-38	EHT_1
JPT1	3.18737e-42	0.256653	0.813	0.659	8.11249e-38	EHT_1
THOC7	5.25487e-42	0.293795	0.624	0.446	1.33747e-37	EHT_1
PCLAF	7.46127e-42	0.283692	0.445	0.264	1.89904e-37	EHT_1
NIP7	7.47581e-42	0.260436	0.488	0.312	1.90274e-37	EHT_1
CCT4	9.2714e-42	0.261481	0.965	0.922	2.35976e-37	EHT_1
DCAF13	1.23334e-41	0.273779	0.654	0.475	3.1391e-37	EHT_1
TOMM40	1.51427e-41	0.299914	0.579	0.407	3.85411e-37	EHT_1
FBL	1.62075e-41	0.291048	0.825	0.686	4.12512e-37	EHT_1
SLC39A3	2.26754e-41	0.25042	0.337	0.186	5.77135e-37	EHT_1
CYC1	4.05975e-41	0.307834	0.734	0.574	1.03329e-36	EHT_1
ODC1	4.31144e-41	0.297812	0.622	0.438	1.09735e-36	EHT_1
SNRPB	5.48964e-41	0.262047	0.98	0.959	1.39722e-36	EHT_1
SNU13	1.1885e-40	0.258307	0.963	0.922	3.02497e-36	EHT_1
RPF2	1.56156e-40	0.254511	0.472	0.3	3.97448e-36	EHT_1
PCNA	1.93224e-40	0.366184	0.487	0.319	4.91794e-36	EHT_1
EIF3J	2.45751e-40	0.309035	0.705	0.539	6.25486e-36	EHT_1
SFRP5	4.43366e-40	0.28506	0.233	0.108	1.12846e-35	EHT_1
GLO1	5.08423e-40	0.366141	0.877	0.781	1.29404e-35	EHT_1
MT-CO2	7.06221e-40	0.25246	1	1	1.79747e-35	EHT_1
C12orf45	7.07622e-40	0.25008	0.519	0.34	1.80104e-35	EHT_1
IMP4	1.0428e-39	0.256129	0.51	0.336	2.65413e-35	EHT_1
KDM1A	1.12089e-39	0.289612	0.684	0.516	2.85288e-35	EHT_1
LRPPRC	1.36744e-39	0.261835	0.595	0.417	3.4804e-35	EHT_1
PRMT1	1.69451e-39	0.304014	0.865	0.789	4.31287e-35	EHT_1
TIMM8A	2.61851e-39	0.269742	0.471	0.3	6.66464e-35	EHT_1
TXNDC17	4.67968e-39	0.299383	0.764	0.619	1.19107e-34	EHT_1
MAT2A	4.9562e-39	0.306943	0.587	0.418	1.26145e-34	EHT_1
IFITM2	6.76134e-39	0.317174	0.935	0.885	1.7209e-34	EHT_1
EXOSC7	7.57348e-39	0.267318	0.725	0.55	1.9276e-34	EHT_1
ACAT1	9.95476e-39	0.250786	0.485	0.315	2.53369e-34	EHT_1
CMSS1	1.03757e-38	0.256612	0.505	0.33	2.64083e-34	EHT_1
LSM5	1.77772e-38	0.277314	0.832	0.682	4.52465e-34	EHT_1
SNRNP40	2.37081e-38	0.251149	0.549	0.372	6.0342e-34	EHT_1
PRDX3	4.33282e-38	0.273415	0.699	0.534	1.10279e-33	EHT_1
TESC	7.4821e-38	0.285544	0.516	0.345	1.90434e-33	EHT_1
MGST2	7.68661e-38	0.253333	0.636	0.451	1.9564e-33	EHT_1
EBNA1BP2	9.47903e-38	0.285437	0.45	0.29	2.4126e-33	EHT_1
PDCD5	1.09799e-37	0.280981	0.885	0.784	2.7946e-33	EHT_1
GTF2F2	1.26642e-37	0.253532	0.549	0.377	3.2233e-33	EHT_1
MRPL57	5.09812e-37	0.277068	0.748	0.587	1.29757e-32	EHT_1
TAF1D	1.37492e-36	0.282158	0.896	0.776	3.49945e-32	EHT_1
GRHPR	1.46906e-36	0.260106	0.701	0.538	3.73906e-32	EHT_1
HPRT1	2.64864e-36	0.251963	0.53	0.362	6.74132e-32	EHT_1
PPM1G	2.65372e-36	0.292258	0.818	0.701	6.75424e-32	EHT_1
HMGN2	3.15436e-36	0.296408	0.827	0.694	8.02848e-32	EHT_1
SUPT16H	5.01006e-36	0.28638	0.761	0.612	1.27516e-31	EHT_1
NIFK	7.39474e-36	0.254487	0.774	0.612	1.88211e-31	EHT_1
CCT6A	1.07864e-35	0.269646	0.912	0.837	2.74535e-31	EHT_1
COX7B	1.12161e-35	0.276754	0.916	0.839	2.85472e-31	EHT_1
HELLS	1.6762e-35	0.262862	0.344	0.199	4.26626e-31	EHT_1
H2AFY	1.82803e-35	0.270985	0.694	0.526	4.65271e-31	EHT_1
SNX5	3.0514e-35	0.277765	0.777	0.616	7.76643e-31	EHT_1
SRSF3	3.91926e-35	0.273033	0.932	0.864	9.97531e-31	EHT_1
LUC7L3	6.16435e-35	0.271627	0.757	0.604	1.56895e-30	EHT_1
NCBP2AS2	8.66758e-35	0.25189	0.618	0.452	2.20607e-30	EHT_1
CDCA7	9.06098e-35	0.284678	0.475	0.315	2.3062e-30	EHT_1
MRPS17	9.43894e-35	0.269198	0.553	0.4	2.4024e-30	EHT_1
HMGN3	1.04348e-34	0.254903	0.789	0.623	2.65587e-30	EHT_1
TUFM	1.12598e-34	0.28371	0.786	0.656	2.86583e-30	EHT_1
SRSF2	1.44854e-34	0.288615	0.735	0.588	3.68681e-30	EHT_1
NDUFAF8	2.78185e-34	0.25934	0.538	0.381	7.08036e-30	EHT_1
MCM6	2.90282e-34	0.27456	0.344	0.205	7.38825e-30	EHT_1
VDAC1	5.83786e-34	0.286351	0.904	0.815	1.48585e-29	EHT_1
SAMSN1	6.75138e-34	0.366333	0.546	0.391	1.71836e-29	EHT_1
PARP1	1.40341e-33	0.27496	0.744	0.59	3.57197e-29	EHT_1
ZRANB2	2.25573e-33	0.265694	0.705	0.55	5.74127e-29	EHT_1
GMFG	3.22712e-33	0.319168	0.682	0.538	8.21366e-29	EHT_1
DANCR	3.62567e-33	0.285493	0.494	0.344	9.22805e-29	EHT_1
LTA4H	4.72102e-33	0.254577	0.588	0.429	1.20159e-28	EHT_1
SERPINB1	1.02579e-32	0.304837	0.514	0.36	2.61083e-28	EHT_1
RPL7L1	1.57652e-32	0.269542	0.708	0.566	4.01257e-28	EHT_1
TRAPPC6A	6.42724e-32	0.256522	0.666	0.517	1.63586e-27	EHT_1
NCBP2	1.08997e-31	0.262465	0.649	0.503	2.77419e-27	EHT_1
CDK6	2.624e-31	0.297203	0.468	0.326	6.67861e-27	EHT_1
STOML2	2.8362e-31	0.254912	0.902	0.805	7.2187e-27	EHT_1
MRPS12	3.28237e-31	0.259549	0.592	0.444	8.3543e-27	EHT_1
EPB41L4A-AS1	1.34719e-30	0.324604	0.788	0.66	3.42887e-26	EHT_1
METAP2	1.52499e-30	0.258339	0.825	0.706	3.88142e-26	EHT_1
MRPS15	1.59525e-30	0.255501	0.694	0.553	4.06022e-26	EHT_1
FADS1	2.13297e-29	0.266663	0.739	0.596	5.42884e-25	EHT_1
NME4	3.09283e-29	0.276023	0.85	0.762	7.87188e-25	EHT_1
XBP1	5.53285e-28	0.339389	0.642	0.518	1.40822e-23	EHT_1
CTNNBL1	4.32438e-27	0.287104	0.654	0.511	1.10064e-22	EHT_1
BMP2K	7.55385e-27	0.267431	0.576	0.434	1.92261e-22	EHT_1
EIF3A	2.5137e-26	0.254757	0.875	0.801	6.39787e-22	EHT_1
PHF6	2.73233e-26	0.268306	0.686	0.553	6.95432e-22	EHT_1
SF3B6	2.93857e-26	0.257725	0.948	0.891	7.47924e-22	EHT_1
ASH2L	1.05746e-24	0.324322	0.511	0.384	2.69144e-20	EHT_1
TMEM14C	2.6423e-24	0.263356	0.825	0.733	6.72519e-20	EHT_1
PPP1R14B	2.95769e-24	0.26214	0.846	0.758	7.5279e-20	EHT_1
BEX1	9.33253e-23	0.500066	0.608	0.507	2.37532e-18	EHT_1
SLC25A37	6.3764e-22	0.502367	0.583	0.476	1.62292e-17	EHT_1
S100A4	4.77969e-21	0.275381	0.486	0.364	1.21653e-16	EHT_1
GATA2	6.71775e-19	0.303316	0.383	0.281	1.7098e-14	EHT_1
BLVRB	3.99723e-09	0.275461	0.599	0.543	0.000101737	EHT_1
IGFBP5	0	2.53624	0.433	0.075	0	Arterial
GJA4	0	1.83782	0.862	0.282	0	Arterial
EFNB2	0	1.76809	0.922	0.32	0	Arterial
FLT1	0	1.44949	0.999	0.857	0	Arterial
PRSS23	0	1.40904	0.755	0.229	0	Arterial
LIMS1	0	1.38129	0.945	0.673	0	Arterial
PLK2	0	1.28967	0.957	0.58	0	Arterial
HEY1	0	1.0032	0.623	0.172	0	Arterial
DLL4	0	0.848536	0.581	0.113	0	Arterial
CXCR4	0	0.65991	0.281	0.028	0	Arterial
PLVAP	2.15585e-306	1.17923	0.977	0.748	5.48708e-302	Arterial
NOTCH4	3.72157e-288	0.663112	0.457	0.1	9.47214e-284	Arterial
HSPG2	4.30815e-274	1.17108	0.912	0.598	1.09651e-269	Arterial
SEC14L1	2.42706e-267	1.04765	0.785	0.387	6.17736e-263	Arterial
WWTR1	1.28447e-248	1.07626	0.725	0.323	3.26924e-244	Arterial
GJA1	3.53856e-243	1.09766	0.694	0.303	9.00634e-239	Arterial
KCNK17	5.9314e-243	0.672458	0.391	0.084	1.50966e-238	Arterial
FAM107B	3.82186e-239	1.17967	0.785	0.413	9.72739e-235	Arterial
SLC45A4	3.1826e-238	0.386078	0.218	0.024	8.10036e-234	Arterial
HES4	2.51186e-233	0.896468	0.817	0.384	6.39319e-229	Arterial
MARCKSL1	5.70004e-225	0.899743	0.974	0.861	1.45077e-220	Arterial
SETBP1	2.45457e-223	0.516595	0.361	0.077	6.24738e-219	Arterial
FILIP1	5.56993e-222	0.657499	0.438	0.113	1.41766e-217	Arterial
MARCKS	9.90473e-217	0.74417	0.999	0.946	2.52095e-212	Arterial
UNC5B	9.96362e-217	0.980534	0.625	0.254	2.53594e-212	Arterial
TMSB10	6.45584e-210	0.65037	1	0.999	1.64314e-205	Arterial
SOX17	5.54384e-205	0.922058	0.572	0.209	1.41102e-200	Arterial
GNAS	1.0551e-199	0.689758	0.998	0.988	2.68544e-195	Arterial
ARHGAP29	5.91105e-197	0.885858	0.813	0.467	1.50448e-192	Arterial
CYP1B1	2.06363e-196	0.887396	0.254	0.042	5.25236e-192	Arterial
SLC2A3	2.94268e-195	0.909151	0.965	0.827	7.4897e-191	Arterial
TMSB4X	5.42376e-189	1.0226	1	0.992	1.38045e-184	Arterial
ADGRL4	7.9451e-188	0.727435	0.634	0.267	2.02219e-183	Arterial
COL4A1	9.0011e-183	0.948494	0.845	0.527	2.29096e-178	Arterial
ARGLU1	5.3694e-180	1.17289	0.893	0.722	1.36662e-175	Arterial
MECOM	8.10964e-180	0.730557	0.599	0.251	2.06407e-175	Arterial
PLXND1	3.8434e-179	0.791186	0.85	0.55	9.78222e-175	Arterial
SLIT3	3.34064e-176	0.481026	0.284	0.059	8.5026e-172	Arterial
DOCK9	1.44505e-175	0.365274	0.295	0.063	3.67794e-171	Arterial
CLDN5	4.90057e-175	0.706931	0.369	0.097	1.24729e-170	Arterial
ADGRF5	1.03762e-173	0.478244	0.388	0.107	2.64095e-169	Arterial
PALM2-AKAP2	1.43223e-171	0.752206	0.778	0.449	3.6453e-167	Arterial
EMP1	1.7643e-171	0.671352	0.406	0.12	4.49049e-167	Arterial
DEPTOR	1.12439e-168	0.335468	0.241	0.044	2.8618e-164	Arterial
ACTG1	2.46308e-167	0.523828	1	0.999	6.26902e-163	Arterial
STC1	3.66855e-165	0.718698	0.359	0.097	9.33719e-161	Arterial
NID1	4.03875e-165	0.785495	0.801	0.497	1.02794e-160	Arterial
PLPP3	1.92652e-164	0.824851	0.557	0.232	4.90337e-160	Arterial
ESAM	1.78235e-162	0.752899	0.832	0.535	4.53644e-158	Arterial
CD93	1.46078e-161	0.847712	0.586	0.251	3.71798e-157	Arterial
CDH5	2.05608e-161	0.713459	0.894	0.615	5.23313e-157	Arterial
IGFBP2	2.07543e-160	0.867628	0.977	0.854	5.28238e-156	Arterial
DIPK2B	7.39628e-160	0.628531	0.55	0.221	1.8825e-155	Arterial
GALNT18	8.93415e-159	0.411115	0.347	0.093	2.27392e-154	Arterial
CREG2	1.66379e-157	0.378261	0.29	0.067	4.23468e-153	Arterial
CALM1	2.85712e-156	0.86065	0.99	0.92	7.27194e-152	Arterial
SPRY4	3.06515e-156	0.380327	0.288	0.066	7.80141e-152	Arterial
GSN	9.87346e-154	0.871812	0.796	0.499	2.51299e-149	Arterial
S100A11	5.24404e-153	0.613382	0.999	0.969	1.33471e-148	Arterial
PECAM1	8.98721e-151	0.750599	0.839	0.56	2.28742e-146	Arterial
CTNNB1	1.39874e-149	0.683996	0.804	0.512	3.56007e-145	Arterial
HEY2	1.5269e-149	0.687985	0.639	0.306	3.88626e-145	Arterial
DEPP1	1.72918e-149	0.677997	0.327	0.09	4.4011e-145	Arterial
EFCAB14	4.90372e-149	0.713959	0.666	0.349	1.2481e-144	Arterial
ZFP36L2	2.15182e-145	0.87076	0.749	0.467	5.47681e-141	Arterial
LPL	2.30033e-145	0.915796	0.518	0.21	5.8548e-141	Arterial
EFNA1	3.35445e-144	0.708967	0.753	0.442	8.53774e-140	Arterial
SPTBN1	8.72775e-141	0.665783	0.974	0.861	2.22139e-136	Arterial
SEMA3G	2.50893e-140	0.341077	0.254	0.057	6.38572e-136	Arterial
NRARP	2.32772e-137	0.400639	0.304	0.082	5.92451e-133	Arterial
COL15A1	2.06746e-136	0.451318	0.355	0.107	5.2621e-132	Arterial
TMOD2	1.32684e-131	0.381083	0.305	0.085	3.37707e-127	Arterial
NRP1	4.56581e-130	0.755184	0.683	0.389	1.16209e-125	Arterial
PREX1	5.54288e-130	0.683842	0.62	0.332	1.41077e-125	Arterial
PKIG	6.40352e-130	0.641353	0.733	0.449	1.62982e-125	Arterial
LIFR	5.10782e-129	0.672152	0.613	0.306	1.30004e-124	Arterial
MMRN2	7.42512e-129	0.612885	0.828	0.57	1.88984e-124	Arterial
AFAP1L1	1.12139e-128	0.600699	0.611	0.312	2.85416e-124	Arterial
APLP2	6.5784e-127	0.765097	0.871	0.708	1.67433e-122	Arterial
CDC42EP3	4.94136e-126	0.329357	0.264	0.067	1.25767e-121	Arterial
CRIM1	4.90108e-125	0.551488	0.452	0.181	1.24742e-120	Arterial
GJA5	7.78359e-125	0.600305	0.352	0.117	1.98108e-120	Arterial
BEX3	1.89926e-123	0.486236	0.998	0.992	4.83399e-119	Arterial
CD9	3.48711e-123	0.702617	0.779	0.472	8.8754e-119	Arterial
HMGA2	4.08091e-123	0.669489	0.683	0.397	1.03867e-118	Arterial
TUBA1A	4.94488e-123	0.823154	0.902	0.724	1.25857e-118	Arterial
MMP14	7.76916e-122	0.501618	0.529	0.239	1.97741e-117	Arterial
LIMCH1	1.24935e-121	0.651101	0.725	0.419	3.17986e-117	Arterial
PRDM1	4.12107e-121	0.359751	0.223	0.051	1.0489e-116	Arterial
RAPGEF5	2.85635e-119	0.572079	0.506	0.224	7.26998e-115	Arterial
DUSP6	1.56574e-118	0.417988	0.351	0.116	3.98511e-114	Arterial
LBH	2.70686e-118	0.61086	0.47	0.199	6.88951e-114	Arterial
EPAS1	1.35898e-116	0.372357	0.287	0.082	3.45887e-112	Arterial
ADAMTS9	6.92482e-116	0.603316	0.436	0.177	1.7625e-111	Arterial
PMEPA1	8.44206e-116	0.693506	0.554	0.273	2.14867e-111	Arterial
CPXM2	1.05639e-114	0.258131	0.154	0.026	2.68872e-110	Arterial
INSR	1.08033e-114	0.574532	0.501	0.231	2.74964e-110	Arterial
UTRN	1.31745e-114	0.606547	0.679	0.394	3.35318e-110	Arterial
ITGA5	8.72902e-114	0.602917	0.776	0.515	2.22171e-109	Arterial
TUBB3	2.59399e-113	0.541272	0.365	0.132	6.60223e-109	Arterial
A2M	1.40129e-111	0.569188	0.361	0.129	3.56656e-107	Arterial
THY1	5.7959e-111	0.667096	0.651	0.362	1.47517e-106	Arterial
ANXA2	2.62558e-110	0.599432	0.92	0.753	6.68262e-106	Arterial
SOX18	2.93008e-110	0.657502	0.593	0.316	7.45764e-106	Arterial
HECW2	6.26783e-110	0.418923	0.229	0.058	1.59529e-105	Arterial
AC087627.1	2.07648e-109	0.337452	0.265	0.075	5.28506e-105	Arterial
LDB2	1.63858e-108	0.585671	0.731	0.45	4.17052e-104	Arterial
PLEKHG1	2.25497e-108	0.439275	0.447	0.185	5.73936e-104	Arterial
POMP	4.19928e-108	0.518698	0.991	0.954	1.0688e-103	Arterial
CEMIP2	8.88486e-108	0.637044	0.599	0.324	2.26137e-103	Arterial
FAM124B	2.76605e-107	0.473931	0.43	0.177	7.04014e-103	Arterial
MEF2C	1.36266e-106	0.621052	0.905	0.706	3.46823e-102	Arterial
TCF4	2.10331e-106	0.73743	0.826	0.617	5.35334e-102	Arterial
NUDT4	3.65126e-106	0.622172	0.443	0.199	9.29318e-102	Arterial
ABL2	1.12615e-105	0.588438	0.586	0.319	2.86629e-101	Arterial
RBP1	3.23243e-105	0.675063	0.732	0.482	8.22719e-101	Arterial
EHD4	1.31906e-104	0.467024	0.492	0.229	3.35727e-100	Arterial
APOLD1	1.82183e-104	0.424825	0.336	0.117	4.63691e-100	Arterial
ACTB	1.75347e-103	0.525122	1	0.999	4.46292e-99	Arterial
ABCG2	1.76546e-103	0.255332	0.173	0.035	4.49344e-99	Arterial
PRCP	2.72252e-103	0.601167	0.896	0.684	6.92936e-99	Arterial
FN1	2.06776e-101	0.929566	0.825	0.588	5.26286e-97	Arterial
PXDN	3.994e-101	0.574935	0.733	0.482	1.01655e-96	Arterial
MAP4K4	2.36258e-100	0.564666	0.718	0.468	6.01325e-96	Arterial
RNASE1	2.90339e-100	0.70525	0.884	0.703	7.38971e-96	Arterial
CAVIN3	1.92552e-98	0.404107	0.298	0.1	4.90083e-94	Arterial
CA8	1.78106e-96	0.279054	0.229	0.063	4.53316e-92	Arterial
HBEGF	2.67162e-96	0.261028	0.171	0.037	6.79981e-92	Arterial
ITGA1	2.84225e-96	0.424138	0.311	0.109	7.2341e-92	Arterial
NPR3	3.53987e-95	0.492253	0.34	0.126	9.00967e-91	Arterial
MAST4	3.62117e-95	0.437393	0.459	0.211	9.2166e-91	Arterial
DENND11	5.55191e-95	0.306494	0.253	0.076	1.41307e-90	Arterial
MAP1B	3.85822e-94	0.661459	0.7	0.462	9.81994e-90	Arterial
TCEAL9	7.90614e-94	0.48304	0.992	0.947	2.01227e-89	Arterial
TSPAN18	8.85307e-94	0.531249	0.714	0.46	2.25328e-89	Arterial
DCLK2	1.16204e-92	0.264623	0.206	0.054	2.95763e-88	Arterial
CNN3	1.26142e-92	0.593446	0.803	0.619	3.21057e-88	Arterial
EOGT	1.41286e-92	0.30046	0.315	0.111	3.596e-88	Arterial
CAVIN1	2.09919e-92	0.565518	0.769	0.529	5.34285e-88	Arterial
NFIB	4.595e-92	0.393119	0.344	0.131	1.16952e-87	Arterial
AHR	6.04081e-92	0.287605	0.235	0.068	1.53751e-87	Arterial
PDGFB	3.19274e-91	0.405849	0.37	0.15	8.12615e-87	Arterial
COL4A2	3.2184e-91	0.617024	0.824	0.63	8.19148e-87	Arterial
LPP	4.59179e-91	0.506205	0.725	0.488	1.1687e-86	Arterial
SNRK	5.72984e-91	0.507908	0.581	0.32	1.45836e-86	Arterial
SIPA1L2	1.50417e-90	0.435656	0.487	0.236	3.8284e-86	Arterial
ABHD17A	6.57944e-90	0.501089	0.807	0.602	1.6746e-85	Arterial
ATP5F1E	9.16021e-90	0.362952	1	0.999	2.33146e-85	Arterial
MAP1LC3A	1.5451e-89	0.562616	0.614	0.363	3.93258e-85	Arterial
APP	7.63754e-88	0.490147	0.878	0.728	1.94391e-83	Arterial
CLSTN3	1.39279e-87	0.301272	0.3	0.106	3.54492e-83	Arterial
IGFBP3	1.88679e-87	0.7123	0.114	0.019	4.80226e-83	Arterial
CFL1	2.49054e-86	0.393727	0.997	0.996	6.33893e-82	Arterial
FZD4	9.01386e-86	0.34314	0.296	0.107	2.29421e-81	Arterial
SOX4	1.04038e-85	0.573928	0.933	0.823	2.64798e-81	Arterial
MYH9	1.0703e-83	0.527928	0.775	0.578	2.72413e-79	Arterial
IGFBP4	2.72281e-83	0.502139	0.995	0.922	6.93009e-79	Arterial
IDS	4.04373e-83	0.544438	0.699	0.469	1.02921e-78	Arterial
PNP	4.08891e-83	0.537514	0.691	0.461	1.04071e-78	Arterial
GRB10	4.39681e-82	0.397188	0.387	0.173	1.11907e-77	Arterial
SYNJ2	3.40409e-81	0.278949	0.247	0.081	8.6641e-77	Arterial
ETS1	2.37513e-80	0.538677	0.768	0.555	6.04519e-76	Arterial
FURIN	3.43954e-80	0.458818	0.578	0.336	8.75432e-76	Arterial
TMEM65	9.19084e-80	0.411555	0.56	0.312	2.33925e-75	Arterial
GRK5	9.28362e-79	0.340054	0.388	0.172	2.36287e-74	Arterial
TMEM100	4.09363e-78	0.269117	0.133	0.028	1.04191e-73	Arterial
HIPK2	6.99114e-78	0.554658	0.612	0.388	1.77938e-73	Arterial
ARHGEF15	7.64916e-78	0.303471	0.318	0.125	1.94686e-73	Arterial
CLEC14A	1.35455e-77	0.462542	0.366	0.159	3.4476e-73	Arterial
LTBP4	2.76285e-77	0.516615	0.538	0.313	7.032e-73	Arterial
MTRF1L	5.69232e-77	0.467535	0.578	0.344	1.44881e-72	Arterial
NREP	1.73225e-76	0.481682	0.631	0.404	4.40892e-72	Arterial
RAPGEF1	1.57118e-75	0.311444	0.314	0.126	3.99896e-71	Arterial
LAMB1	2.30775e-75	0.456735	0.469	0.245	5.87368e-71	Arterial
TMEM204	2.40479e-75	0.313261	0.339	0.141	6.12068e-71	Arterial
PLAGL1	3.87297e-73	0.506902	0.585	0.365	9.85748e-69	Arterial
NOTCH1	8.37757e-73	0.484252	0.71	0.496	2.13226e-68	Arterial
SPRED1	1.58315e-72	0.344642	0.351	0.156	4.02942e-68	Arterial
TPM4	2.87621e-72	0.40402	0.988	0.944	7.32053e-68	Arterial
AAK1	5.88499e-72	0.453104	0.553	0.328	1.49785e-67	Arterial
FBXL7	1.83528e-70	0.279247	0.261	0.097	4.67116e-66	Arterial
FLT4	2.50309e-70	0.310351	0.339	0.145	6.37087e-66	Arterial
SH2D3C	5.0533e-70	0.33562	0.387	0.181	1.28617e-65	Arterial
DUSP5	9.73116e-70	0.453384	0.623	0.391	2.47678e-65	Arterial
TSPAN13	1.5981e-69	0.428014	0.454	0.239	4.06748e-65	Arterial
TJP1	3.60496e-69	0.456527	0.717	0.512	9.17535e-65	Arterial
DOCK4	4.85308e-69	0.372525	0.372	0.175	1.23521e-64	Arterial
DST	1.18152e-68	0.436912	0.44	0.227	3.00722e-64	Arterial
UBE2J1	1.22268e-68	0.511742	0.537	0.329	3.11197e-64	Arterial
GNAI2	1.63389e-68	0.360852	0.989	0.966	4.15857e-64	Arterial
SLC9A3R2	1.79643e-68	0.535897	0.752	0.554	4.57228e-64	Arterial
KITLG	4.6202e-68	0.335997	0.281	0.11	1.17593e-63	Arterial
AGRN	5.47223e-68	0.343834	0.414	0.206	1.39279e-63	Arterial
SLC2A1	7.05417e-68	0.652279	0.463	0.25	1.79543e-63	Arterial
FOXC1	7.53804e-68	0.324433	0.301	0.123	1.91858e-63	Arterial
NOVA2	1.23884e-67	0.368436	0.422	0.211	3.15309e-63	Arterial
FNDC3B	3.54425e-67	0.420684	0.548	0.33	9.02081e-63	Arterial
HS3ST1	2.49371e-66	0.341311	0.216	0.073	6.347e-62	Arterial
PTPRB	6.66459e-66	0.36323	0.413	0.207	1.69627e-61	Arterial
TIE1	3.06153e-65	0.448773	0.767	0.589	7.7922e-61	Arterial
MPRIP	4.64136e-65	0.399701	0.58	0.36	1.18132e-60	Arterial
TNFSF10	5.83438e-65	0.267703	0.169	0.049	1.48497e-60	Arterial
TM4SF18	9.67419e-65	0.350443	0.411	0.2	2.46228e-60	Arterial
BCL6B	1.47966e-64	0.374454	0.497	0.276	3.76604e-60	Arterial
DLC1	1.511e-64	0.445754	0.513	0.3	3.84581e-60	Arterial
CALCRL	1.99307e-64	0.497543	0.694	0.478	5.07276e-60	Arterial
CFLAR	5.43368e-64	0.429849	0.609	0.389	1.38298e-59	Arterial
PTPRE	2.02205e-63	0.353524	0.451	0.242	5.14653e-59	Arterial
ACTN4	1.00162e-62	0.420406	0.718	0.524	2.54932e-58	Arterial
ITPRIPL2	1.17277e-62	0.410712	0.554	0.346	2.98493e-58	Arterial
YWHAZ	4.70271e-62	0.381127	0.953	0.884	1.19693e-57	Arterial
MYCT1	1.9601e-60	0.36332	0.504	0.289	4.98886e-56	Arterial
MYO6	2.42516e-60	0.416279	0.679	0.468	6.17253e-56	Arterial
PODXL	1.15159e-59	0.457252	0.533	0.318	2.93102e-55	Arterial
LYPD6B	1.96319e-59	0.272772	0.242	0.094	4.9967e-55	Arterial
FYN	2.49892e-59	0.389764	0.62	0.414	6.36024e-55	Arterial
F11R	1.29145e-58	0.48723	0.717	0.545	3.287e-54	Arterial
ZEB1	1.48368e-58	0.409022	0.571	0.359	3.77626e-54	Arterial
PHC2	3.49713e-58	0.406971	0.535	0.339	8.90089e-54	Arterial
PPP1R16B	1.6022e-57	0.326369	0.405	0.214	4.07793e-53	Arterial
FLNA	2.79476e-57	0.483437	0.793	0.649	7.11322e-53	Arterial
DOCK6	2.83009e-57	0.399746	0.673	0.475	7.20315e-53	Arterial
ARPC5	3.15688e-57	0.397128	0.873	0.765	8.0349e-53	Arterial
ZSWIM6	4.99243e-57	0.369406	0.495	0.296	1.27067e-52	Arterial
SHE	5.78019e-57	0.365912	0.595	0.384	1.47117e-52	Arterial
GIMAP4	5.86344e-57	0.360003	0.39	0.197	1.49236e-52	Arterial
MYO10	7.9172e-57	0.340796	0.439	0.24	2.01509e-52	Arterial
CTHRC1	1.45818e-56	0.488395	0.36	0.182	3.71136e-52	Arterial
DDX5	1.71187e-56	0.332152	0.984	0.946	4.35706e-52	Arterial
SOX11	2.11996e-56	0.489452	0.432	0.247	5.39572e-52	Arterial
RGS3	2.17113e-56	0.381845	0.553	0.352	5.52595e-52	Arterial
EMCN	2.70374e-56	0.358071	0.445	0.237	6.88155e-52	Arterial
CD40	5.21028e-56	0.419743	0.685	0.485	1.32612e-51	Arterial
DGKH	3.04696e-55	0.344906	0.397	0.211	7.75513e-51	Arterial
MAFB	4.34884e-55	0.973316	0.238	0.1	1.10687e-50	Arterial
CD81	9.21535e-55	0.353228	0.942	0.869	2.34549e-50	Arterial
RHOC	1.59047e-54	0.379095	0.94	0.845	4.04805e-50	Arterial
SERPINH1	3.12582e-54	0.380361	0.974	0.903	7.95582e-50	Arterial
CCND2	3.53483e-54	0.403403	0.788	0.621	8.99685e-50	Arterial
CYP1A1	6.97773e-54	0.288679	0.154	0.047	1.77597e-49	Arterial
GAP43	1.4225e-53	0.303292	0.273	0.119	3.62054e-49	Arterial
ARPC2	9.6936e-53	0.314202	0.976	0.933	2.46722e-48	Arterial
ECSCR	3.3476e-52	0.349323	0.907	0.774	8.52032e-48	Arterial
LAMC1	7.45635e-52	0.35102	0.54	0.344	1.89779e-47	Arterial
BCAP29	8.39925e-52	0.368106	0.541	0.352	2.13778e-47	Arterial
S100A16	1.33204e-51	0.433992	0.77	0.58	3.3903e-47	Arterial
RIN2	1.70785e-51	0.310461	0.391	0.211	4.34683e-47	Arterial
MYL6	4.50862e-51	0.348444	0.999	0.992	1.14753e-46	Arterial
PAPSS1	5.15086e-51	0.45907	0.614	0.428	1.311e-46	Arterial
FKBP1A	8.3091e-51	0.365183	0.952	0.894	2.11483e-46	Arterial
IGDCC3	1.46547e-50	0.410086	0.525	0.332	3.72992e-46	Arterial
ARRDC3	1.51932e-50	0.449561	0.523	0.339	3.86696e-46	Arterial
TGFBR3	4.39388e-50	0.374241	0.504	0.307	1.11833e-45	Arterial
TGFBR2	5.68017e-50	0.327879	0.396	0.218	1.44572e-45	Arterial
CD99	5.82527e-50	0.34993	0.972	0.91	1.48265e-45	Arterial
LAPTM4B	7.70998e-50	0.346297	0.986	0.965	1.96234e-45	Arterial
SEMA4C	9.02779e-50	0.291746	0.417	0.232	2.29775e-45	Arterial
FBLIM1	1.20063e-49	0.350446	0.522	0.331	3.05585e-45	Arterial
BMPR2	1.33437e-49	0.378275	0.591	0.402	3.39623e-45	Arterial
MMP9	1.87327e-49	1.82611	0.331	0.178	4.76784e-45	Arterial
FGFR1	4.45194e-49	0.325031	0.652	0.45	1.13311e-44	Arterial
PTP4A3	5.02082e-49	0.338542	0.422	0.243	1.2779e-44	Arterial
FMNL3	5.17879e-49	0.28571	0.401	0.22	1.31811e-44	Arterial
CD276	2.74035e-48	0.35177	0.532	0.347	6.97474e-44	Arterial
KLF6	2.78706e-48	0.442877	0.64	0.46	7.09362e-44	Arterial
RBMS1	4.54352e-48	0.354676	0.716	0.546	1.15642e-43	Arterial
PTPN12	7.49155e-48	0.360558	0.641	0.46	1.90675e-43	Arterial
MYL12A	7.92919e-48	0.294117	0.997	0.974	2.01814e-43	Arterial
CD59	1.70948e-47	0.448628	0.538	0.364	4.35096e-43	Arterial
CARD8	1.87407e-47	0.265451	0.326	0.165	4.76989e-43	Arterial
SPIN4	3.64649e-47	0.464829	0.532	0.361	9.28105e-43	Arterial
PEA15	8.59768e-47	0.329998	0.546	0.358	2.18828e-42	Arterial
DSP	9.95784e-47	0.360972	0.514	0.33	2.53447e-42	Arterial
AP2A2	1.13731e-46	0.309401	0.46	0.276	2.89468e-42	Arterial
SERINC5	1.85053e-46	0.277727	0.309	0.153	4.70997e-42	Arterial
B4GALT5	5.22301e-46	0.346893	0.571	0.389	1.32936e-41	Arterial
CTNNA1	9.88831e-46	0.348831	0.727	0.579	2.51677e-41	Arterial
EXOC3L2	1.35336e-45	0.274026	0.341	0.179	3.44456e-41	Arterial
ARHGEF7	1.80077e-45	0.273559	0.386	0.214	4.58332e-41	Arterial
NES	1.89281e-45	0.380018	0.504	0.324	4.81759e-41	Arterial
RAB31	3.24526e-45	0.363462	0.597	0.418	8.25984e-41	Arterial
TFPI	3.41965e-45	0.357281	0.987	0.927	8.70369e-41	Arterial
TLE5	4.65009e-45	0.336803	0.812	0.687	1.18354e-40	Arterial
VGLL4	4.89755e-45	0.357237	0.621	0.446	1.24652e-40	Arterial
ELK3	7.34724e-45	0.337644	0.684	0.505	1.87002e-40	Arterial
TUBB2A	9.2295e-45	0.317849	0.422	0.244	2.34909e-40	Arterial
JAM3	2.12551e-44	0.354492	0.746	0.573	5.40985e-40	Arterial
ACTR2	3.26765e-44	0.346128	0.885	0.79	8.31683e-40	Arterial
LIPA	6.47472e-44	0.272784	0.335	0.178	1.64794e-39	Arterial
RGS5	7.69532e-44	0.455491	0.617	0.44	1.95861e-39	Arterial
MTSS1	1.39638e-43	0.309395	0.476	0.295	3.55407e-39	Arterial
ADAM10	1.82848e-43	0.333874	0.664	0.495	4.65385e-39	Arterial
LPAR6	1.85884e-43	0.284873	0.387	0.216	4.73111e-39	Arterial
TCEAL4	2.814e-43	0.315037	0.92	0.843	7.1622e-39	Arterial
FCGRT	4.03221e-43	0.336187	0.486	0.308	1.02628e-38	Arterial
TSPAN7	4.46252e-43	0.274543	0.257	0.121	1.1358e-38	Arterial
OCIAD2	6.39982e-43	0.335549	0.433	0.259	1.62888e-38	Arterial
VAMP5	1.12169e-42	0.459022	0.795	0.656	2.85491e-38	Arterial
YES1	1.32509e-42	0.364057	0.719	0.574	3.37262e-38	Arterial
H19	4.06718e-42	1.06948	0.563	0.433	1.03518e-37	Arterial
SLC44A1	5.28856e-42	0.383626	0.726	0.57	1.34605e-37	Arterial
CCNY	8.49521e-42	0.334743	0.632	0.467	2.1622e-37	Arterial
NEDD9	9.11303e-42	0.262466	0.259	0.123	2.31945e-37	Arterial
PHACTR2	1.59837e-41	0.374255	0.59	0.419	4.06816e-37	Arterial
MYL12B	1.78503e-41	0.319693	0.942	0.886	4.54327e-37	Arterial
TP53I11	2.6339e-41	0.363429	0.6	0.431	6.7038e-37	Arterial
CAP1	4.71213e-41	0.335428	0.846	0.751	1.19933e-36	Arterial
CD34	8.15975e-41	0.352497	0.858	0.744	2.07682e-36	Arterial
SASH1	1.65953e-40	0.321087	0.545	0.372	4.22384e-36	Arterial
VCAN	1.84816e-40	0.447402	0.477	0.308	4.70395e-36	Arterial
SIPA1	1.8706e-40	0.281076	0.437	0.268	4.76104e-36	Arterial
QKI	1.92864e-40	0.335531	0.758	0.617	4.90877e-36	Arterial
TPM3	2.05305e-40	0.291935	0.957	0.913	5.22543e-36	Arterial
TUBB6	1.3665e-39	0.338786	0.66	0.49	3.47803e-35	Arterial
KTN1	1.40951e-39	0.322785	0.897	0.838	3.58749e-35	Arterial
CRIP2	1.45251e-39	0.356553	0.637	0.467	3.69694e-35	Arterial
PPM1F	6.76278e-39	0.313894	0.553	0.382	1.72126e-34	Arterial
C4orf48	7.62754e-39	0.383999	0.706	0.571	1.94136e-34	Arterial
RRBP1	1.4139e-38	0.317789	0.863	0.755	3.59865e-34	Arterial
NHSL2	1.76438e-38	0.296716	0.437	0.272	4.49069e-34	Arterial
KIF5B	1.92173e-38	0.369599	0.87	0.796	4.89119e-34	Arterial
SMS	2.00824e-38	0.40332	0.904	0.851	5.11138e-34	Arterial
DCBLD1	2.87257e-38	0.251022	0.316	0.169	7.31126e-34	Arterial
KIF1B	4.19151e-38	0.283417	0.565	0.392	1.06682e-33	Arterial
LMO2	4.79665e-38	0.342201	0.695	0.54	1.22084e-33	Arterial
TSC22D1	4.86571e-38	0.41601	0.738	0.622	1.23842e-33	Arterial
COL5A2	6.64868e-38	0.353158	0.751	0.586	1.69222e-33	Arterial
FOXO1	8.86244e-38	0.263624	0.371	0.217	2.25567e-33	Arterial
SPATS2L	8.97249e-38	0.304745	0.457	0.292	2.28368e-33	Arterial
ITGA9	1.28986e-37	0.28026	0.461	0.29	3.28294e-33	Arterial
IGF2R	1.39458e-37	0.299287	0.41	0.254	3.54949e-33	Arterial
MASP1	1.94348e-37	0.29711	0.297	0.157	4.94656e-33	Arterial
UNC5B-AS1	3.61648e-37	0.323543	0.159	0.063	9.20467e-33	Arterial
NDUFB2	6.09012e-37	0.310717	0.871	0.795	1.55006e-32	Arterial
MIDN	1.35596e-36	0.337904	0.734	0.595	3.45118e-32	Arterial
MBNL2	1.6964e-36	0.284711	0.442	0.282	4.31767e-32	Arterial
MYH10	1.71822e-36	0.321497	0.635	0.474	4.3732e-32	Arterial
PGM2L1	3.84394e-36	0.256498	0.306	0.168	9.7836e-32	Arterial
ITM2B	5.77418e-36	0.261697	0.99	0.961	1.46964e-31	Arterial
EIF4G2	6.81427e-36	0.284554	0.94	0.879	1.73437e-31	Arterial
TUBB2B	1.56635e-35	0.366774	0.467	0.307	3.98667e-31	Arterial
RNF149	1.60651e-35	0.305224	0.422	0.269	4.08889e-31	Arterial
MRC2	2.45458e-35	0.322613	0.528	0.371	6.24741e-31	Arterial
ATP11A	3.06041e-35	0.276334	0.448	0.289	7.78936e-31	Arterial
TEK	3.9804e-35	0.296427	0.583	0.409	1.01309e-30	Arterial
RALB	5.30966e-35	0.291436	0.58	0.415	1.35141e-30	Arterial
GNB1	8.4667e-35	0.31691	0.819	0.717	2.15494e-30	Arterial
PBX2	3.71769e-34	0.273146	0.472	0.315	9.46227e-30	Arterial
RTN4	6.39038e-34	0.282665	0.934	0.88	1.62648e-29	Arterial
YWHAB	6.83795e-34	0.285925	0.947	0.89	1.74039e-29	Arterial
TAOK1	1.905e-33	0.295465	0.635	0.493	4.84861e-29	Arterial
RTL8C	2.327e-33	0.291692	0.541	0.389	5.92268e-29	Arterial
CSTB	2.46223e-33	0.262727	0.98	0.935	6.26687e-29	Arterial
EDIL3	3.53164e-33	0.270231	0.679	0.512	8.98874e-29	Arterial
ITGB1	3.91167e-33	0.269891	0.996	0.971	9.95599e-29	Arterial
RABEP1	4.13984e-33	0.333897	0.531	0.387	1.05367e-28	Arterial
MGST3	8.36914e-33	0.317168	0.926	0.876	2.13011e-28	Arterial
NCKAP1	8.69178e-33	0.295717	0.634	0.483	2.21223e-28	Arterial
RASIP1	2.06644e-32	0.28381	0.632	0.481	5.2595e-28	Arterial
TGM2	2.16993e-32	0.364312	0.633	0.49	5.52289e-28	Arterial
JUP	2.77195e-32	0.295056	0.571	0.426	7.05517e-28	Arterial
SEMA6A	4.76038e-32	0.264552	0.472	0.315	1.21161e-27	Arterial
IQGAP1	6.66268e-32	0.307678	0.586	0.448	1.69579e-27	Arterial
IFI16	8.17524e-32	0.305648	0.842	0.721	2.08076e-27	Arterial
GRN	1.03414e-31	0.300378	0.712	0.589	2.6321e-27	Arterial
ERBIN	1.08457e-31	0.282742	0.542	0.392	2.76046e-27	Arterial
ARHGEF12	1.4173e-31	0.301654	0.482	0.332	3.60731e-27	Arterial
BAALC	1.81435e-31	0.292107	0.47	0.314	4.61787e-27	Arterial
FJX1	2.15118e-31	0.258186	0.282	0.157	5.47519e-27	Arterial
MYADM	3.11304e-31	0.360574	0.49	0.348	7.92332e-27	Arterial
ATOX1	6.47664e-31	0.276152	0.881	0.799	1.64844e-26	Arterial
THSD1	9.08594e-31	0.271116	0.399	0.254	2.31255e-26	Arterial
SH3PXD2A	1.0859e-30	0.269692	0.427	0.281	2.76382e-26	Arterial
ENC1	1.16479e-30	0.314065	0.404	0.26	2.96464e-26	Arterial
PPP1R18	2.07554e-30	0.272165	0.738	0.61	5.28266e-26	Arterial
MACF1	2.33433e-30	0.313126	0.762	0.638	5.94134e-26	Arterial
SHANK3	3.77676e-30	0.262319	0.519	0.367	9.6126e-26	Arterial
CDC42BPB	4.06949e-30	0.256999	0.501	0.347	1.03577e-25	Arterial
MCAM	6.72956e-30	0.278049	0.411	0.267	1.71281e-25	Arterial
CTNND1	9.47458e-30	0.267527	0.615	0.471	2.41147e-25	Arterial
TNFRSF1B	1.09416e-29	0.267764	0.515	0.37	2.78485e-25	Arterial
GNAI1	1.41959e-29	0.29391	0.55	0.413	3.61314e-25	Arterial
COPS9	2.40374e-29	0.281488	0.8	0.705	6.11801e-25	Arterial
GTF2I	2.61109e-29	0.267617	0.801	0.703	6.64574e-25	Arterial
SRGAP1	5.24476e-29	0.256386	0.479	0.332	1.3349e-24	Arterial
SPARC	6.33583e-29	0.25198	0.791	0.68	1.6126e-24	Arterial
F2R	7.86921e-29	0.299534	0.823	0.72	2.00287e-24	Arterial
TMEM30A	8.18971e-29	0.305943	0.469	0.334	2.08445e-24	Arterial
AKAP13	1.29319e-28	0.30111	0.604	0.472	3.29143e-24	Arterial
CDV3	1.55518e-28	0.279343	0.735	0.622	3.95824e-24	Arterial
RGS16	2.34757e-28	0.360629	0.413	0.278	5.97503e-24	Arterial
ADD3	2.46891e-28	0.298597	0.676	0.553	6.28388e-24	Arterial
ARHGDIA	8.20873e-28	0.277298	0.679	0.567	2.08929e-23	Arterial
NCOA3	1.15351e-27	0.333164	0.431	0.297	2.93591e-23	Arterial
SMTN	1.34005e-27	0.259808	0.521	0.374	3.41068e-23	Arterial
HEG1	3.5176e-27	0.264994	0.382	0.249	8.95301e-23	Arterial
NDN	3.8839e-27	0.276061	0.519	0.391	9.8853e-23	Arterial
PHGDH	6.70631e-27	0.34615	0.59	0.464	1.70689e-22	Arterial
NPDC1	7.48783e-27	0.256719	0.611	0.47	1.9058e-22	Arterial
PSAP	8.71407e-27	0.264348	0.824	0.765	2.21791e-22	Arterial
SHISA5	1.1961e-26	0.278911	0.62	0.498	3.04432e-22	Arterial
DDX17	1.42343e-26	0.261288	0.91	0.859	3.62293e-22	Arterial
AHNAK	1.66613e-26	0.312072	0.593	0.454	4.24064e-22	Arterial
SNHG14	2.12719e-25	0.277644	0.829	0.742	5.41412e-21	Arterial
IVNS1ABP	2.71483e-25	0.325423	0.457	0.333	6.90978e-21	Arterial
ROCK2	3.75429e-25	0.250267	0.571	0.436	9.55543e-21	Arterial
ATP11C	4.16583e-25	0.258571	0.379	0.253	1.06029e-20	Arterial
RESF1	5.72149e-25	0.296155	0.69	0.582	1.45623e-20	Arterial
ZFHX3	5.98285e-25	0.260183	0.399	0.271	1.52275e-20	Arterial
AFDN	7.36087e-25	0.262838	0.605	0.478	1.87349e-20	Arterial
MICOS10	9.00389e-25	0.263525	0.586	0.456	2.29167e-20	Arterial
ARPC5L	9.14702e-25	0.278848	0.67	0.565	2.3281e-20	Arterial
TGFB1	1.10559e-24	0.262956	0.8	0.726	2.81396e-20	Arterial
TRIP12	1.33514e-24	0.273749	0.582	0.462	3.39819e-20	Arterial
FNBP1L	2.32081e-24	0.261583	0.521	0.39	5.90692e-20	Arterial
COLEC12	2.04638e-23	0.259206	0.516	0.377	5.20843e-19	Arterial
TACC1	2.87723e-23	0.302157	0.588	0.474	7.32311e-19	Arterial
KLHL4	9.84771e-23	0.279215	0.448	0.32	2.50644e-18	Arterial
RASGRP3	1.0133e-22	0.255957	0.583	0.462	2.57906e-18	Arterial
DEGS1	1.4469e-22	0.287654	0.462	0.344	3.68265e-18	Arterial
ADAMTS1	2.53362e-22	0.262986	0.235	0.135	6.44857e-18	Arterial
XIAP	3.07623e-22	0.251531	0.612	0.491	7.82961e-18	Arterial
CREM	6.0553e-22	0.288635	0.583	0.457	1.54119e-17	Arterial
ACTR3	7.01994e-22	0.254777	0.711	0.625	1.78672e-17	Arterial
BICD1	1.39348e-21	0.262655	0.457	0.337	3.54668e-17	Arterial
ARMCX2	1.43528e-21	0.255298	0.533	0.414	3.65307e-17	Arterial
TLNRD1	2.13496e-21	0.263577	0.72	0.607	5.4339e-17	Arterial
NNAT	7.02853e-21	0.454966	0.512	0.4	1.7889e-16	Arterial
DAB2	7.69562e-21	0.25023	0.474	0.351	1.95869e-16	Arterial
DIAPH2	3.46798e-20	0.304637	0.456	0.353	8.82671e-16	Arterial
SLC7A8	4.64777e-20	0.275525	0.116	0.053	1.18295e-15	Arterial
SPRY1	6.17422e-19	0.267063	0.425	0.312	1.57146e-14	Arterial
TIMP3	7.96098e-16	0.259293	0.815	0.772	2.02623e-11	Arterial
WSB1	3.36665e-13	0.25183	0.878	0.845	8.5688e-09	Arterial
ID3	1.46885e-12	0.264819	0.938	0.893	3.73853e-08	Arterial
HSPA1B	0	2.63918	0.947	0.107	0	Dox_induced
HSPA6	0	1.92978	0.707	0.004	0	Dox_induced
HSPA1A	8.38219e-216	3.74802	0.991	0.279	2.13343e-211	Dox_induced
DNAJB1	6.12123e-199	2.77917	0.973	0.3	1.55798e-194	Dox_induced
RRAD	3.90253e-158	0.399959	0.231	0.012	9.93272e-154	Dox_induced
CRYAB	5.52716e-131	0.534497	0.187	0.009	1.40677e-126	Dox_induced
MXD1	2.43594e-122	0.568478	0.382	0.044	6.19995e-118	Dox_induced
HSP90AA1	2.3101e-96	1.72671	1	0.996	5.87967e-92	Dox_induced
AC010624.5	5.70121e-94	0.318315	0.164	0.01	1.45107e-89	Dox_induced
HSPH1	2.39089e-69	1.44767	0.8	0.405	6.0853e-65	Dox_induced
SLC3A2	4.62347e-68	1.13654	0.942	0.656	1.17677e-63	Dox_induced
UBC	2.14824e-67	1.33195	1	0.981	5.4677e-63	Dox_induced
HSP90AB1	7.37928e-65	0.780258	1	1	1.87818e-60	Dox_induced
H3F3B	1.11183e-63	1.00915	1	0.999	2.82984e-59	Dox_induced
DNAJB4	5.14845e-56	0.529357	0.413	0.1	1.31038e-51	Dox_induced
FTL	2.45605e-51	0.867386	1	1	6.25113e-47	Dox_induced
SAT1	1.24676e-50	0.943063	0.964	0.734	3.17326e-46	Dox_induced
HSPB1	1.79956e-49	1.06387	0.996	0.939	4.58024e-45	Dox_induced
PIM3	7.7952e-49	0.988932	0.818	0.454	1.98403e-44	Dox_induced
RRAGD	5.49751e-47	0.620142	0.489	0.155	1.39923e-42	Dox_induced
DEDD2	6.08254e-47	0.500778	0.4	0.107	1.54813e-42	Dox_induced
OSER1	7.27711e-47	0.856929	0.667	0.31	1.85217e-42	Dox_induced
GADD45B	8.76623e-47	0.599427	0.347	0.084	2.23118e-42	Dox_induced
INSIG1	1.45345e-45	0.726	0.591	0.227	3.69932e-41	Dox_induced
RGS2	1.84697e-45	0.419725	0.284	0.059	4.7009e-41	Dox_induced
FABP3	1.39287e-43	0.585673	0.293	0.063	3.54513e-39	Dox_induced
GDF15	6.45665e-42	0.840951	0.444	0.137	1.64335e-37	Dox_induced
HIST2H2BE	1.85785e-41	0.264774	0.147	0.019	4.72861e-37	Dox_induced
CREBRF	2.84426e-41	0.669846	0.542	0.207	7.2392e-37	Dox_induced
RPS4X	2.73403e-40	0.480019	1	1	6.95866e-36	Dox_induced
RPL18	2.34177e-39	0.368857	1	1	5.96027e-35	Dox_induced
RPL8	1.31262e-38	0.378538	1	1	3.34087e-34	Dox_induced
RPL10	1.31716e-38	0.367052	1	1	3.35244e-34	Dox_induced
DUSP2	4.86896e-38	0.369768	0.204	0.037	1.23925e-33	Dox_induced
MSMO1	2.08636e-37	0.957743	0.751	0.437	5.31021e-33	Dox_induced
HMOX1	9.80518e-37	0.569528	0.471	0.167	2.49561e-32	Dox_induced
RPL11	1.18264e-36	0.349989	1	1	3.01005e-32	Dox_induced
RPL24	2.1139e-36	0.370068	1	1	5.3803e-32	Dox_induced
RPL26	5.66038e-36	0.366647	1	1	1.44068e-31	Dox_induced
RPL13	8.8883e-34	0.315752	1	1	2.26225e-29	Dox_induced
SAT2	5.38052e-33	0.694438	0.782	0.513	1.36945e-28	Dox_induced
RND1	5.82003e-33	0.267033	0.187	0.035	1.48131e-28	Dox_induced
RPL35A	6.32053e-33	0.348853	1	1	1.6087e-28	Dox_induced
RPL19	1.40788e-32	0.342865	1	1	3.58334e-28	Dox_induced
CLK1	2.64682e-32	0.618671	0.498	0.206	6.73669e-28	Dox_induced
RPL29	2.72227e-32	0.349017	1	1	6.92873e-28	Dox_induced
FAU	4.21944e-32	0.34583	1	1	1.07393e-27	Dox_induced
PPP1R15A	2.20857e-31	0.762145	0.742	0.469	5.62126e-27	Dox_induced
EIF1	5.49782e-31	0.544924	1	1	1.3993e-26	Dox_induced
MAFF	2.40495e-30	0.485359	0.342	0.108	6.12107e-26	Dox_induced
NACA	2.53789e-30	0.374818	1	1	6.45944e-26	Dox_induced
YPEL2	8.85265e-30	0.506	0.418	0.156	2.25318e-25	Dox_induced
RPS24	1.22404e-29	0.327488	1	1	3.11542e-25	Dox_induced
RPS27	8.95535e-29	0.346868	1	1	2.27932e-24	Dox_induced
CACYBP	1.24862e-28	0.717675	0.796	0.551	3.17798e-24	Dox_induced
DDIT4	5.6367e-28	1.07025	0.813	0.533	1.43465e-23	Dox_induced
PIM1	6.78559e-28	0.392212	0.382	0.133	1.72707e-23	Dox_induced
BHLHE40	7.41286e-28	0.720262	0.493	0.215	1.88672e-23	Dox_induced
RPS25	9.02216e-28	0.331789	1	1	2.29632e-23	Dox_induced
RPL32	3.83347e-27	0.299982	1	1	9.75695e-23	Dox_induced
RPS14	3.98565e-27	0.275427	1	1	1.01443e-22	Dox_induced
UBB	5.73052e-27	0.572415	1	0.989	1.45853e-22	Dox_induced
RPS28	6.37604e-27	0.299174	1	1	1.62283e-22	Dox_induced
RPL18A	7.0319e-27	0.323033	1	1	1.78976e-22	Dox_induced
CDKN1A	9.65095e-27	0.476438	0.427	0.164	2.45636e-22	Dox_induced
RPS18	1.309e-26	0.292751	1	1	3.33167e-22	Dox_induced
SNHG7	7.40074e-26	0.592465	0.929	0.788	1.88364e-21	Dox_induced
ATF3	1.19352e-25	0.401842	0.302	0.095	3.03776e-21	Dox_induced
RPS15A	2.6968e-25	0.300094	1	1	6.8639e-21	Dox_induced
PPDPF	4.83997e-25	0.573353	0.987	0.959	1.23187e-20	Dox_induced
RPL22L1	7.39876e-25	0.560739	0.871	0.645	1.88313e-20	Dox_induced
PLIN2	9.82442e-25	0.717873	0.827	0.637	2.50051e-20	Dox_induced
RPS3A	1.43304e-24	0.280524	1	1	3.64737e-20	Dox_induced
RPS19	1.46504e-24	0.290908	1	1	3.72881e-20	Dox_induced
TPT1	1.49581e-24	0.266271	1	1	3.80714e-20	Dox_induced
ZFAS1	2.17878e-24	0.42306	1	0.998	5.54543e-20	Dox_induced
RPL30	2.28489e-24	0.306297	1	1	5.81549e-20	Dox_induced
GAS5	1.01228e-23	0.542985	1	0.975	2.57644e-19	Dox_induced
RPS27A	2.13681e-23	0.287857	1	1	5.43861e-19	Dox_induced
NPC2	3.71878e-23	0.558661	0.969	0.872	9.46503e-19	Dox_induced
PRDX6	6.04291e-23	0.466405	0.982	0.971	1.53804e-18	Dox_induced
RPL7A	1.11749e-22	0.28356	1	1	2.84422e-18	Dox_induced
UBA52	1.15342e-22	0.298891	1	1	2.93568e-18	Dox_induced
CCN1	1.62611e-22	0.354266	0.2	0.052	4.13878e-18	Dox_induced
RPL12	2.07321e-22	0.325926	1	1	5.27672e-18	Dox_induced
RPS23	2.70643e-22	0.256238	1	1	6.8884e-18	Dox_induced
RPL14	2.98143e-22	0.276157	1	1	7.58834e-18	Dox_induced
SLC5A3	4.96206e-22	0.506181	0.498	0.246	1.26294e-17	Dox_induced
JUN	1.05494e-21	0.768422	0.653	0.413	2.68503e-17	Dox_induced
SNHG6	2.17756e-21	0.439545	0.987	0.93	5.54233e-17	Dox_induced
TRMT112	3.97042e-21	0.485392	0.969	0.921	1.01055e-16	Dox_induced
RPL22	1.41391e-20	0.31052	1	1	3.59869e-16	Dox_induced
MALAT1	2.33433e-20	0.723131	1	0.997	5.94134e-16	Dox_induced
RPS15	2.98715e-20	0.263906	1	1	7.60288e-16	Dox_induced
MROH8	4.46257e-20	0.362128	0.102	0.018	1.13581e-15	Dox_induced
RPL41	6.21678e-20	0.263063	1	1	1.58229e-15	Dox_induced
RPL3	6.66229e-20	0.253693	1	1	1.69569e-15	Dox_induced
BTF3	1.12495e-19	0.305731	1	1	2.86323e-15	Dox_induced
APOE	2.3777e-19	0.568318	0.951	0.82	6.05172e-15	Dox_induced
RPL17	2.54735e-19	0.251869	1	1	6.48352e-15	Dox_induced
RPL34	3.29985e-19	0.282084	1	1	8.39879e-15	Dox_induced
PFDN5	1.07803e-18	0.323498	1	0.996	2.7438e-14	Dox_induced
CKS2	1.7788e-18	0.517138	0.756	0.549	4.52741e-14	Dox_induced
RPS9	1.79347e-18	0.263317	1	1	4.56474e-14	Dox_induced
EFNA3	1.89304e-17	0.282088	0.293	0.112	4.81817e-13	Dox_induced
RPL36	1.90399e-17	0.269382	1	1	4.84604e-13	Dox_induced
GABARAP	2.12167e-17	0.428478	1	0.97	5.40007e-13	Dox_induced
NXN	2.14466e-17	0.422053	0.436	0.218	5.4586e-13	Dox_induced
RPL35	2.18248e-17	0.265552	1	1	5.55486e-13	Dox_induced
FTH1	2.1913e-17	0.349193	1	1	5.5773e-13	Dox_induced
PHLDA2	2.59176e-17	0.620442	0.556	0.328	6.59656e-13	Dox_induced
EPB41L4A-AS1	6.19e-17	0.508182	0.827	0.669	1.57548e-12	Dox_induced
NAMPT	7.74083e-17	0.46017	0.72	0.523	1.9702e-12	Dox_induced
CSTB	1.09159e-16	0.459811	0.996	0.938	2.77831e-12	Dox_induced
RPS5	1.37979e-16	0.26219	1	1	3.51185e-12	Dox_induced
ASAH1	1.91067e-16	0.560867	0.716	0.534	4.86304e-12	Dox_induced
RPS13	2.81268e-16	0.259244	1	1	7.15883e-12	Dox_induced
TIMP1	7.56909e-16	0.378934	1	0.994	1.92648e-11	Dox_induced
CD63	1.88126e-15	0.337458	1	0.999	4.78818e-11	Dox_induced
EEF1D	2.23233e-15	0.356536	0.991	0.985	5.68173e-11	Dox_induced
EIF4A2	2.38781e-15	0.376284	0.964	0.901	6.07747e-11	Dox_induced
TCEAL9	2.52118e-15	0.431245	0.996	0.95	6.41691e-11	Dox_induced
RPL10A	3.428e-15	0.264162	1	1	8.72495e-11	Dox_induced
ANKRD37	4.6465e-15	0.383257	0.347	0.159	1.18263e-10	Dox_induced
ARRDC3	1.03083e-14	0.47423	0.551	0.351	2.62368e-10	Dox_induced
RPL39	1.13692e-14	0.332715	1	1	2.89369e-10	Dox_induced
PLCG2	1.1954e-14	0.469466	0.453	0.25	3.04254e-10	Dox_induced
STX3	1.19881e-14	0.444158	0.649	0.448	3.0512e-10	Dox_induced
CHORDC1	1.85584e-14	0.525598	0.467	0.271	4.72347e-10	Dox_induced
TMEM258	2.69227e-14	0.349773	0.996	0.976	6.85235e-10	Dox_induced
RPL5	3.40508e-14	0.294324	1	1	8.6666e-10	Dox_induced
DDIT3	4.39697e-14	0.486512	0.422	0.231	1.11912e-09	Dox_induced
BBC3	4.40809e-14	0.355037	0.396	0.203	1.12195e-09	Dox_induced
FNIP1	4.90627e-14	0.347276	0.502	0.294	1.24874e-09	Dox_induced
CCT4	1.97236e-13	0.367508	0.978	0.925	5.02006e-09	Dox_induced
EIF3F	2.87184e-13	0.289527	1	0.988	7.3094e-09	Dox_induced
DUSP1	3.26363e-13	0.536194	0.458	0.269	8.30658e-09	Dox_induced
VIM	5.16416e-13	0.331872	1	0.997	1.31438e-08	Dox_induced
RPS16	5.74509e-13	0.268001	1	1	1.46224e-08	Dox_induced
MYLIP	6.12462e-13	0.366275	0.436	0.247	1.55884e-08	Dox_induced
COX7C	6.20802e-13	0.260266	1	0.999	1.58007e-08	Dox_induced
COX7A2L	6.30352e-13	0.380322	0.916	0.824	1.60437e-08	Dox_induced
NEU1	8.16854e-13	0.429151	0.529	0.337	2.07906e-08	Dox_induced
RBM39	8.85909e-13	0.367485	0.933	0.83	2.25482e-08	Dox_induced
VEGFA	8.87651e-13	0.317454	0.373	0.191	2.25925e-08	Dox_induced
NPM1	9.57948e-13	0.28928	1	1	2.43817e-08	Dox_induced
RNF7	1.18778e-12	0.380991	0.947	0.865	3.02313e-08	Dox_induced
RSRC2	1.58153e-12	0.421781	0.738	0.592	4.02531e-08	Dox_induced
VDAC2	4.62119e-12	0.299012	0.978	0.936	1.17619e-07	Dox_induced
FLCN	5.87835e-12	0.28928	0.311	0.152	1.49616e-07	Dox_induced
TNFRSF12A	2.24102e-11	0.374934	0.236	0.102	5.70383e-07	Dox_induced
LAMP2	2.47112e-11	0.347916	0.724	0.569	6.2895e-07	Dox_induced
CCNB1IP1	2.67133e-11	0.327835	0.92	0.815	6.79908e-07	Dox_induced
COG3	3.02407e-11	0.269996	0.284	0.136	7.69685e-07	Dox_induced
RNASEK	4.62194e-11	0.258354	0.991	0.98	1.17638e-06	Dox_induced
KMT2E	5.60107e-11	0.403724	0.698	0.564	1.42559e-06	Dox_induced
SYF2	9.79763e-11	0.380234	0.751	0.625	2.49369e-06	Dox_induced
SMIM26	1.16315e-10	0.349681	0.902	0.82	2.96044e-06	Dox_induced
SSR3	1.24761e-10	0.298145	0.978	0.92	3.17541e-06	Dox_induced
UNC5B-AS1	1.99827e-10	0.303902	0.178	0.069	5.08599e-06	Dox_induced
BEX2	2.20291e-10	0.33605	0.427	0.255	5.60684e-06	Dox_induced
CCNG2	2.24596e-10	0.299657	0.382	0.218	5.71641e-06	Dox_induced
KRT19	3.07412e-10	0.390876	0.284	0.143	7.82426e-06	Dox_induced
KDELR1	3.75917e-10	0.289388	0.987	0.975	9.56784e-06	Dox_induced
KRT10	4.6129e-10	0.395255	0.831	0.742	1.17408e-05	Dox_induced
DNAJA1	6.78503e-10	0.394859	0.871	0.821	1.72693e-05	Dox_induced
TOMM6	7.22207e-10	0.29711	0.978	0.917	1.83816e-05	Dox_induced
EIF1B	8.97779e-10	0.347022	0.809	0.748	2.28503e-05	Dox_induced
RALA	2.10944e-09	0.385603	0.951	0.885	5.36895e-05	Dox_induced
SSR4	3.45311e-09	0.281741	0.996	0.964	8.78885e-05	Dox_induced
HMGCS1	4.13046e-09	0.468831	0.538	0.381	0.000105128	Dox_induced
CTSD	4.71766e-09	0.342033	0.684	0.569	0.000120074	Dox_induced
RAB11A	6.09478e-09	0.28276	0.969	0.928	0.000155124	Dox_induced
SCD	7.15875e-09	0.39918	0.884	0.781	0.000182204	Dox_induced
LGALS1	8.64714e-09	0.28609	0.964	0.828	0.000220087	Dox_induced
MTRNR2L12	1.03542e-08	0.514391	0.747	0.666	0.000263535	Dox_induced
MIF	1.17425e-08	0.268229	1	1	0.00029887	Dox_induced
C16orf87	1.85831e-08	0.288886	0.524	0.368	0.000472977	Dox_induced
VAT1	2.01831e-08	0.320608	0.751	0.657	0.000513701	Dox_induced
BRI3	2.70194e-08	0.309692	0.987	0.94	0.000687697	Dox_induced
MAP1LC3B	2.83963e-08	0.360821	0.689	0.58	0.000722744	Dox_induced
NEAT1	4.1622e-08	0.292239	0.982	0.935	0.00105936	Dox_induced
POLR1D	4.76084e-08	0.286354	0.836	0.75	0.00121173	Dox_induced
B2M	6.74666e-08	0.297993	0.996	0.977	0.00171716	Dox_induced
GADD45A	6.89757e-08	0.443588	0.538	0.416	0.00175557	Dox_induced
CIRBP	8.10836e-08	0.251321	0.92	0.861	0.00206374	Dox_induced
TAF9	8.92318e-08	0.263826	0.644	0.501	0.00227113	Dox_induced
IFRD1	9.80979e-08	0.282847	0.476	0.323	0.00249679	Dox_induced
BEX1	1.02358e-07	0.285632	0.671	0.514	0.00260522	Dox_induced
CHCHD10	2.2425e-07	0.314832	0.796	0.75	0.00570762	Dox_induced
TOMM20	2.24955e-07	0.250286	1	0.979	0.00572555	Dox_induced
SNX3	2.4047e-07	0.25127	0.978	0.925	0.00612043	Dox_induced
CCNL1	3.11986e-07	0.354439	0.622	0.5	0.00794067	Dox_induced
POLR2H	5.18611e-07	0.285781	0.618	0.493	0.0131997	Dox_induced
SNHG5	5.28785e-07	0.289898	0.764	0.687	0.0134586	Dox_induced
ENO2	5.88897e-07	0.336558	0.556	0.429	0.0149886	Dox_induced
P4HB	6.602e-07	0.269828	0.933	0.895	0.0168034	Dox_induced
BSG	6.61769e-07	0.326237	0.929	0.904	0.0168434	Dox_induced
HMGA1	8.47116e-07	0.288557	0.947	0.907	0.0215608	Dox_induced
RIOK3	9.12467e-07	0.389833	0.609	0.499	0.0232241	Dox_induced
HSPA8	1.04393e-06	0.338695	0.978	0.949	0.0265702	Dox_induced
SCML1	1.07073e-06	0.263235	0.436	0.303	0.0272523	Dox_induced
CAMLG	1.0844e-06	0.260784	0.787	0.693	0.0276001	Dox_induced
HOXB2	1.19307e-06	0.271247	0.364	0.243	0.0303661	Dox_induced
YTHDC1	1.24833e-06	0.328258	0.596	0.486	0.0317725	Dox_induced
H1F0	1.29153e-06	0.375741	0.573	0.473	0.0328719	Dox_induced
TCP1	1.55964e-06	0.253841	0.773	0.685	0.039696	Dox_induced
CCNG1	1.74394e-06	0.252004	0.902	0.813	0.0443867	Dox_induced
KDELR2	1.91976e-06	0.31015	0.916	0.858	0.0488618	Dox_induced
CCL2	0	3.46588	0.936	0.078	0	Venous_2
CXCL10	3.7706e-166	1.34104	0.286	0.011	9.59693e-162	Venous_2
CXCL3	9.90473e-105	1.83905	0.45	0.049	2.52095e-100	Venous_2
CXCL2	5.06277e-102	1.37242	0.386	0.037	1.28858e-97	Venous_2
CCL4L2	2.88588e-98	1.17439	0.221	0.012	7.34515e-94	Venous_2
CXCL1	2.81425e-94	0.520626	0.179	0.008	7.16283e-90	Venous_2
TNFAIP3	7.1281e-91	0.828921	0.479	0.062	1.81424e-86	Venous_2
CCL20	3.41011e-80	1.10696	0.114	0.004	8.67941e-76	Venous_2
LTB	5.72274e-66	1.10742	0.329	0.04	1.45655e-61	Venous_2
NFKBIA	1.67896e-55	1.6692	0.864	0.412	4.27328e-51	Venous_2
ICAM1	4.91858e-47	1.57012	0.764	0.325	1.25188e-42	Venous_2
RND1	3.49464e-41	0.411944	0.25	0.035	8.89455e-37	Venous_2
IER3	1.49151e-38	0.919751	0.579	0.186	3.7962e-34	Venous_2
NUAK2	2.80165e-33	0.388089	0.236	0.038	7.13076e-29	Venous_2
RELB	1.61333e-30	0.529603	0.5	0.158	4.10624e-26	Venous_2
CEBPD	6.25709e-30	0.962043	0.457	0.149	1.59256e-25	Venous_2
CXCL5	8.51787e-21	0.679227	0.307	0.089	2.16797e-16	Venous_2
CD69	6.58837e-20	0.459866	0.279	0.075	1.67687e-15	Venous_2
NFKB1	8.5857e-20	0.469603	0.4	0.142	2.18523e-15	Venous_2
IL32	3.62195e-18	0.703845	0.514	0.226	9.2186e-14	Venous_2
ADAMTS9	6.40944e-17	0.56557	0.45	0.196	1.63133e-12	Venous_2
F2RL1	6.75015e-17	0.286938	0.2	0.048	1.71805e-12	Venous_2
IL4I1	8.62923e-16	0.342052	0.293	0.095	2.19631e-11	Venous_2
CSF1	7.25504e-15	0.350401	0.257	0.08	1.84655e-10	Venous_2
RGS16	1.0881e-13	0.620347	0.55	0.287	2.76944e-09	Venous_2
JUNB	1.14725e-13	0.742801	0.814	0.629	2.91998e-09	Venous_2
NET1	1.42606e-13	0.458437	0.571	0.305	3.62962e-09	Venous_2
SOX4	7.68952e-13	0.704706	0.914	0.831	1.95714e-08	Venous_2
NFKBIZ	7.75419e-13	0.346052	0.271	0.096	1.9736e-08	Venous_2
SDCBP	1.38462e-12	0.548032	0.921	0.75	3.52412e-08	Venous_2
CLDN5	2.11317e-12	0.948345	0.3	0.118	5.37843e-08	Venous_2
ZFP36	3.01885e-12	0.491425	0.486	0.252	7.68359e-08	Venous_2
RGS3	5.85815e-12	0.517021	0.6	0.367	1.49102e-07	Venous_2
DDIT4	6.54521e-12	1.05723	0.721	0.536	1.66589e-07	Venous_2
TFPI	8.37531e-12	0.459108	0.993	0.932	2.13168e-07	Venous_2
FMNL3	1.33853e-11	0.359001	0.464	0.233	3.40683e-07	Venous_2
SQSTM1	5.43761e-11	0.500061	0.707	0.496	1.38398e-06	Venous_2
LRIG3	9.79797e-11	0.484594	0.443	0.23	2.49378e-06	Venous_2
BCL6B	1.36804e-10	0.423868	0.507	0.293	3.48194e-06	Venous_2
TLNRD1	5.67832e-10	0.450099	0.8	0.615	1.44525e-05	Venous_2
CREB5	1.66643e-09	0.519221	0.464	0.267	4.24139e-05	Venous_2
TNIP1	1.78373e-09	0.400492	0.471	0.269	4.53994e-05	Venous_2
PDE4B	1.79289e-09	0.403214	0.379	0.188	4.56326e-05	Venous_2
RNASEK	2.03925e-09	0.326494	1	0.98	5.19031e-05	Venous_2
NFKB2	4.48932e-09	0.284229	0.293	0.13	0.000114262	Venous_2
NINJ1	4.93843e-09	0.371219	0.457	0.253	0.000125693	Venous_2
TNFAIP1	5.30761e-09	0.364615	0.521	0.309	0.000135089	Venous_2
VEGFA	5.33142e-09	0.348146	0.379	0.192	0.000135695	Venous_2
DUSP5	6.16514e-09	0.443716	0.621	0.409	0.000156915	Venous_2
SOX7	2.31605e-08	0.507799	0.7	0.513	0.00058948	Venous_2
FRMD4B	3.49176e-08	0.373767	0.371	0.199	0.000888723	Venous_2
FLT1	3.64496e-08	0.447874	0.964	0.868	0.000927714	Venous_2
PLK2	6.3448e-08	0.488695	0.786	0.61	0.00161488	Venous_2
JUN	8.6184e-08	0.410731	0.614	0.415	0.00219356	Venous_2
KLF7	9.28934e-08	0.32707	0.371	0.2	0.00236432	Venous_2
PDLIM1	1.12642e-07	0.53837	0.779	0.672	0.00286697	Venous_2
ISG20	1.66463e-07	0.342762	0.271	0.129	0.00423682	Venous_2
ARRDC3	2.59463e-07	0.363327	0.55	0.353	0.00660386	Venous_2
TGFBR3	3.07926e-07	0.385463	0.507	0.321	0.00783734	Venous_2
DDX5	3.43086e-07	0.260001	0.964	0.949	0.00873222	Venous_2
DAAM1	5.17824e-07	0.401317	0.693	0.523	0.0131797	Venous_2
SDC4	7.70509e-07	0.25482	0.429	0.248	0.019611	Venous_2
F2RL2	8.15284e-07	0.35023	0.679	0.494	0.0207506	Venous_2
PHLDA1	1.08802e-06	0.403954	0.536	0.356	0.0276922	Venous_2
F2R	1.42029e-06	0.352716	0.836	0.728	0.0361493	Venous_2
ARHGAP29	1.50314e-06	0.395673	0.671	0.494	0.038258	Venous_2
B3GNT2	1.9035e-06	0.257741	0.479	0.302	0.0484478	Venous_2

## Sheet: Marker genes in vivo AGM
gene	p_val	avg_logFC	pct.1	pct.2	p_val_adj
GJA5	1.95542e-37	1.82272	1	0.714	2.86821e-33
BST2	7.43453e-36	1.47274	1	0.914	1.0905e-31
ADGRG6	1.66655e-34	1.93829	0.957	0.469	2.4445e-30
LTBP4	4.24093e-29	1.61883	0.963	0.651	6.22059e-25
GBP4	5.21842e-29	1.68825	0.938	0.474	7.65438e-25
KCNK17	3.26682e-28	1.61781	0.95	0.566	4.79178e-24
SRGN	3.07637e-27	1.62673	0.969	0.611	4.51241e-23
SYTL2	1.90053e-25	2.07072	0.776	0.257	2.78769e-21
TMEM100	2.29393e-25	1.44119	0.925	0.503	3.36474e-21
GJA4	3.8427e-25	1.32002	0.981	0.834	5.63648e-21
HEY2	4.16222e-25	1.14979	0.994	0.691	6.10515e-21
SYNPO	2.24339e-24	1.29794	0.882	0.429	3.29061e-20
NCOA7	9.7959e-24	1.75125	0.925	0.514	1.43686e-19
TFPI	1.12219e-23	0.813249	1	1	1.64603e-19
CLEC14A	2.21765e-23	1.30524	0.994	0.754	3.25285e-19
CFH	7.52901e-22	1.61859	0.839	0.394	1.10436e-17
PROCR	1.02401e-20	0.931201	1	0.909	1.50201e-16
ARGLU1	1.04263e-20	0.792527	1	1	1.52933e-16
HEY1	1.82062e-20	1.12884	0.988	0.897	2.67049e-16
RGS16	5.81748e-20	1.41961	0.95	0.806	8.53307e-16
CGNL1	9.67177e-20	1.19674	0.925	0.606	1.41866e-15
GUCY1A3	1.78245e-19	1.53257	0.64	0.183	2.61449e-15
MTUS1	1.94615e-19	1.19189	0.981	0.851	2.85461e-15
ID2	7.83776e-19	0.851537	1	0.994	1.14964e-14
RUNX1T1	9.46167e-19	1.03277	0.975	0.754	1.38784e-14
FOXS1	9.50324e-19	1.75479	0.534	0.109	1.39394e-14
IL11RA	1.55889e-18	1.08623	0.919	0.611	2.28659e-14
SULF1	1.89424e-18	1.48197	0.646	0.189	2.77847e-14
MECOM	3.36968e-18	0.901743	1	0.851	4.94264e-14
PALMD	4.38738e-18	1.99669	0.627	0.206	6.43541e-14
PRDM16	5.67517e-18	1.27605	0.745	0.297	8.32434e-14
KIAA1551	6.3166e-18	0.998082	0.994	0.903	9.26519e-14
RUNX1	9.53309e-18	1.72171	0.733	0.326	1.39831e-13
UNC5B	2.76203e-17	0.829247	0.981	0.714	4.05134e-13
EFNA1	3.96932e-17	0.853542	1	0.983	5.8222e-13
PDLIM1	6.97603e-17	0.796139	0.988	0.743	1.02324e-12
DLL4	1.49783e-16	0.845307	0.957	0.743	2.19701e-12
TSPAN7	2.03332e-16	1.04408	0.938	0.714	2.98248e-12
BICD1	2.63867e-16	0.913838	0.963	0.749	3.8704e-12
PRSS23	4.17238e-16	1.0451	0.981	0.811	6.12005e-12
SETBP1	4.17252e-16	1.07861	0.82	0.389	6.12025e-12
MYB	6.85354e-16	1.74043	0.689	0.303	1.00528e-11
CROT	7.84463e-16	1.59799	0.739	0.371	1.15065e-11
OCIAD2	9.59471e-16	1.00461	0.963	0.851	1.40735e-11
CARTPT	1.39939e-15	1.10178	0.82	0.423	2.05263e-11
ARHGDIB	1.54133e-15	0.801139	1	0.937	2.26083e-11
PDE8B	2.16781e-15	1.45918	0.602	0.194	3.17974e-11
CD24	9.53518e-15	0.584312	1	1	1.39862e-10
EPAS1	1.89652e-14	0.688925	0.975	0.743	2.78181e-10
F2R	2.17293e-14	0.573401	1	0.989	3.18725e-10
SERPINB9	3.86019e-14	0.833135	0.969	0.829	5.66213e-10
ME3	6.08675e-14	0.845522	0.634	0.24	8.92805e-10
MRC2	7.4056e-14	0.937334	0.944	0.737	1.08625e-09
SERINC5	7.55441e-14	1.03759	0.932	0.617	1.10808e-09
DPY19L2	7.72803e-14	1.34854	0.578	0.211	1.13355e-09
EFNB2	1.22127e-13	0.682365	1	0.966	1.79136e-09
DRAM1	1.82629e-13	1.09571	0.77	0.406	2.67881e-09
COL23A1	1.89355e-13	1.18711	0.665	0.291	2.77746e-09
SOX6	2.69853e-13	1.02744	0.801	0.406	3.9582e-09
HMCN2	3.564e-13	1.13384	0.677	0.309	5.22767e-09
B3GNT2	4.66058e-13	0.702447	0.988	0.823	6.83614e-09
CRABP1	6.37245e-13	1.89431	0.46	0.12	9.3471e-09
TP53TG1	7.80928e-13	0.908425	0.957	0.771	1.14547e-08
DKK1	8.10642e-13	1.53349	0.509	0.16	1.18905e-08
PLCG2	8.36349e-13	1.2034	0.702	0.326	1.22676e-08
CYB561	1.4804e-12	1.08897	0.683	0.337	2.17145e-08
BMX	1.69271e-12	1.69662	0.348	0.051	2.48286e-08
DUSP1	2.64122e-12	0.593075	1	0.994	3.87414e-08
BEX1	6.07994e-12	0.82846	0.957	0.777	8.91806e-08
BEX2	6.50578e-12	1.03351	0.814	0.48	9.54268e-08
SSBP2	6.89898e-12	0.813613	0.938	0.84	1.01194e-07
SMAD6	7.24788e-12	1.01741	0.851	0.571	1.06312e-07
SLC16A1	7.48137e-12	0.679444	0.994	0.983	1.09737e-07
HAPLN3	8.00676e-12	0.627251	1	0.977	1.17443e-07
PAPSS1	8.7538e-12	0.751444	0.969	0.851	1.28401e-07
MEIS1	9.49774e-12	0.949419	0.938	0.76	1.39313e-07
C10orf10	1.02212e-11	0.908685	0.957	0.783	1.49925e-07
EPB41	2.35596e-11	1.03843	0.776	0.451	3.45572e-07
CSPP1	2.66042e-11	1.06226	0.925	0.777	3.9023e-07
HES4	3.09188e-11	0.871926	0.752	0.411	4.53517e-07
ELN	3.7846e-11	0.800953	0.727	0.383	5.55125e-07
SERPINB6	3.97019e-11	0.623811	1	0.909	5.82348e-07
FNBP1	4.53099e-11	0.71964	0.981	0.92	6.64605e-07
ACE	4.63824e-11	0.929027	0.484	0.149	6.80337e-07
SYNGR2	4.80455e-11	0.675059	0.925	0.674	7.04731e-07
ABLIM1	4.9532e-11	0.693129	0.975	0.943	7.26536e-07
CD44	5.05962e-11	1.26063	0.783	0.543	7.42144e-07
BTG2	5.22009e-11	0.987352	0.938	0.771	7.65682e-07
RPL34	6.10291e-11	0.367868	1	1	8.95174e-07
ITPR2	1.02081e-10	1.02768	0.665	0.366	1.49733e-06
LINC00982	1.10906e-10	1.32947	0.422	0.12	1.62677e-06
MMRN1	1.67535e-10	0.693511	0.981	0.897	2.45741e-06
PLAGL1	2.06474e-10	0.689387	0.95	0.811	3.02856e-06
B2M	2.07173e-10	0.43639	1	1	3.03881e-06
BCL11A	2.07859e-10	1.04821	0.64	0.32	3.04888e-06
GCA	2.64584e-10	0.71199	0.876	0.531	3.88092e-06
SEPT4	2.9329e-10	0.913041	0.391	0.097	4.30198e-06
F11R	3.15549e-10	0.620009	0.969	0.863	4.62848e-06
PCBD1	3.40184e-10	0.681295	0.851	0.509	4.98982e-06
BISPR	4.24691e-10	1.10258	0.516	0.211	6.22937e-06
RPL31	4.36278e-10	0.342065	1	1	6.39933e-06
PDCD4	4.63153e-10	0.74523	0.944	0.851	6.79353e-06
GNPTAB	5.52717e-10	0.805714	0.863	0.651	8.10725e-06
LRRC36	5.7607e-10	1.24528	0.373	0.097	8.4498e-06
TPD52L1	5.81605e-10	1.20173	0.615	0.326	8.53098e-06
CPQ	6.1514e-10	1.02011	0.708	0.423	9.02287e-06
RND1	6.6521e-10	1.05288	0.708	0.434	9.75729e-06
BMPER	9.99092e-10	1.32761	0.429	0.149	1.46547e-05
GALNT18	1.03536e-09	0.529121	0.863	0.537	1.51866e-05
SV2C	1.1046e-09	1.11854	0.435	0.143	1.62023e-05
RPS3A	1.13432e-09	0.348492	1	1	1.66382e-05
SORT1	2.12919e-09	0.735063	0.689	0.36	3.1231e-05
PUS7	2.16332e-09	0.759984	0.832	0.566	3.17315e-05
GATA6	2.35407e-09	1.15538	0.72	0.434	3.45295e-05
PCGF5	3.38622e-09	0.839829	0.553	0.246	4.96691e-05
FN1	3.64801e-09	0.567489	1	0.994	5.35091e-05
IFITM3	4.13997e-09	0.429515	1	1	6.0725e-05
SEMA3G	4.17584e-09	1.08395	0.689	0.429	6.12512e-05
IL18R1	5.3399e-09	1.14931	0.516	0.234	7.83256e-05
PLD3	5.98905e-09	0.442697	0.988	0.949	8.78474e-05
IFITM1	6.81096e-09	1.09544	0.609	0.326	9.99031e-05
ISYNA1	7.67857e-09	0.538531	0.981	0.909	0.000112629
COBLL1	8.45772e-09	1.09383	0.615	0.349	0.000124058
TFDP2	8.48432e-09	0.736966	0.876	0.697	0.000124448
CNPY2	1.05868e-08	0.48088	1	0.994	0.000155288
TSC22D1	1.07751e-08	0.521229	0.988	1	0.00015805
PRKG1	1.09288e-08	1.08564	0.547	0.257	0.000160303
CD47	1.11678e-08	0.613625	0.969	0.92	0.000163809
ABCC4	1.12031e-08	1.08945	0.602	0.32	0.000164327
CST3	1.30463e-08	0.633724	0.988	0.971	0.000191363
CYTL1	1.38416e-08	1.15663	0.615	0.349	0.000203028
IRF2BP2	1.61917e-08	0.528269	0.981	0.926	0.000237499
MEG3	1.85919e-08	0.512926	0.963	0.829	0.000272706
RPS14	1.87374e-08	0.309007	1	1	0.00027484
AGTR2	2.14519e-08	1.24083	0.28	0.057	0.000314657
SLIT3	2.15102e-08	1.20447	0.509	0.251	0.000315511
TMCC3	2.19615e-08	0.850799	0.888	0.726	0.000322131
HSD11B2	2.28422e-08	0.816269	0.416	0.143	0.000335049
CXCR4	2.53874e-08	0.370347	0.925	0.737	0.000372383
HIST2H2BE	2.61702e-08	0.644964	0.863	0.68	0.000383864
RPS18	2.6495e-08	0.312125	1	1	0.000388629
EVL	3.0047e-08	0.591816	0.957	0.72	0.00044073
AFAP1L2	3.12759e-08	0.576415	0.789	0.446	0.000458755
SPARC	3.25022e-08	0.573234	0.994	0.994	0.000476743
NFIA	3.39444e-08	1.19623	0.242	0.04	0.000497896
LRIG3	3.55382e-08	0.681871	0.938	0.806	0.000521274
NNAT	3.75524e-08	0.518417	1	0.989	0.000550818
CEP126	3.83709e-08	0.990213	0.627	0.354	0.000562824
TMEM59	3.9252e-08	0.432742	1	0.977	0.000575748
TACR1	4.18646e-08	0.55149	0.342	0.091	0.00061407
RPS6	4.64973e-08	0.289021	1	1	0.000682023
LST1	4.71209e-08	0.597283	0.652	0.366	0.000691169
LYPD6B	4.75928e-08	0.875939	0.416	0.16	0.00069809
RPL39	4.84462e-08	0.296698	1	1	0.000710608
ITM2B	5.39374e-08	0.384792	1	1	0.000791154
RPL7	5.873e-08	0.339292	1	1	0.000861452
MYCT1	6.05788e-08	0.550364	0.988	0.971	0.000888571
TRO	6.05996e-08	0.551483	0.963	0.829	0.000888875
ATP6V0E1	6.39745e-08	0.415323	0.988	0.971	0.000938377
PLCB2	6.87835e-08	0.755094	0.82	0.56	0.00100892
HOOK1	7.14868e-08	1.22301	0.298	0.08	0.00104857
PYCARD	8.58365e-08	0.767751	0.758	0.514	0.00125905
PCDH10	9.08811e-08	0.631403	0.745	0.491	0.00133304
COMT	9.5643e-08	0.496774	0.957	0.88	0.00140289
SLC2A3	1.03198e-07	0.489691	1	0.989	0.00151371
TM4SF1	1.1066e-07	0.62793	0.981	0.834	0.00162315
DRAM2	1.18723e-07	0.669645	0.913	0.817	0.00174143
CTNNAL1	1.39025e-07	0.975821	0.932	0.931	0.00203922
SNHG16	1.57153e-07	0.506603	1	1	0.00230512
CYSTM1	1.61839e-07	0.792958	0.72	0.463	0.00237386
EMP1	2.07316e-07	0.80458	0.516	0.257	0.00304092
CLEC3B	2.12552e-07	1.02436	0.435	0.189	0.00311771
CXCL2	2.26485e-07	1.30336	0.826	0.629	0.00332208
ANXA3	2.379e-07	1.22031	0.429	0.183	0.00348952
SERPING1	2.57638e-07	0.404935	1	0.989	0.00377903
NENF	2.65541e-07	0.826197	0.714	0.474	0.00389496
IL33	2.72397e-07	1.09096	0.217	0.034	0.00399553
FAT4	2.72437e-07	0.642137	0.714	0.451	0.00399611
SLC45A4	2.8284e-07	0.510437	0.534	0.251	0.00414869
TMEM120A	2.82881e-07	0.930431	0.615	0.383	0.00414929
ANGPT1	2.83799e-07	0.941954	0.59	0.343	0.00416277
LRP12	2.91506e-07	0.707387	0.478	0.229	0.00427582
TAX1BP1	3.08043e-07	0.5854	0.994	0.96	0.00451838
BTK	3.53788e-07	1.07767	0.335	0.12	0.00518936
SOST	3.62989e-07	0.711586	0.944	0.817	0.00532432
PLVAP	3.64711e-07	0.489394	1	1	0.00534958
PLTP	3.92318e-07	0.607675	0.795	0.549	0.00575452
ARHGAP4	3.94347e-07	0.526301	0.876	0.68	0.00578428
EDN1	4.30339e-07	1.10237	0.783	0.657	0.00631221
TNIK	4.38854e-07	0.856108	0.522	0.269	0.00643711
TTC13	4.41635e-07	0.839122	0.702	0.491	0.0064779
IFI44L	4.5143e-07	0.686917	0.137	0	0.00662157
RASGEF1B	4.59272e-07	0.567907	0.472	0.217	0.0067366
SNX10	4.96198e-07	0.636767	0.416	0.171	0.00727823
EPHA4	5.4161e-07	1.09829	0.491	0.263	0.00794434
LIMD2	5.94283e-07	0.447186	1	0.971	0.00871695
HEXA	5.96313e-07	0.611069	0.87	0.68	0.00874673
STXBP2	6.02832e-07	1.04096	0.286	0.086	0.00884234
SPON1	6.0812e-07	0.862051	0.472	0.223	0.0089199
SRGAP1	6.82061e-07	0.702822	0.839	0.651	0.0100045
KIAA1161	6.85408e-07	0.805965	0.366	0.131	0.0100536
USP53	8.14979e-07	0.737535	0.634	0.383	0.0119541
MRI1	8.22673e-07	0.739057	0.776	0.554	0.012067
MALAT1	8.35815e-07	0.254816	1	1	0.0122597
ARRDC1	8.49033e-07	0.828188	0.534	0.28	0.0124536
GIMAP7	8.80685e-07	1.00161	0.534	0.291	0.0129179
ARID5B	9.09413e-07	0.769005	0.807	0.577	0.0133393
SMAD7	9.58805e-07	0.663042	0.907	0.731	0.0140638
RPL29	9.86699e-07	0.282881	1	1	0.0144729
FREM1	1.02533e-06	1.24189	0.286	0.086	0.0150395
FIRRE	1.07194e-06	0.86958	0.435	0.211	0.0157233
OCLN	1.08507e-06	0.451106	0.193	0.029	0.0159158
NDUFC2	1.15024e-06	0.436084	1	1	0.0168717
NQO2	1.16008e-06	0.722388	0.559	0.309	0.017016
PPT2	1.21268e-06	0.577053	0.714	0.474	0.0177875
LINC01356	1.26945e-06	0.924253	0.46	0.234	0.0186203
SIDT1	1.27403e-06	1.09976	0.267	0.074	0.0186874
BGN	1.40318e-06	0.493898	0.981	0.96	0.0205819
MLLT3	1.44824e-06	0.628094	0.839	0.611	0.0212428
COMMD6	1.49131e-06	0.363039	1	0.994	0.0218745
ATL2	1.56911e-06	0.686098	0.851	0.674	0.0230157
SATB1	1.66488e-06	0.639386	0.795	0.629	0.0244205
SLC1A3	1.6846e-06	1.04362	0.398	0.177	0.0247096
FZD6	1.72275e-06	0.826843	0.739	0.509	0.0252692
TXNIP	1.81792e-06	0.770688	0.876	0.789	0.0266652
GSTK1	2.22148e-06	0.489389	0.981	0.96	0.0325847
TAGLN2	2.24798e-06	0.374369	1	1	0.0329734
ABRACL	2.6658e-06	0.453903	1	0.994	0.039102
GPX7	2.93143e-06	0.589505	0.925	0.834	0.0429983
SMAD9	3.05206e-06	0.700411	0.472	0.234	0.0447676
RABGAP1	3.23985e-06	0.793784	0.82	0.606	0.0475222
HERC1	3.23995e-06	0.722726	0.938	0.869	0.0475236
APLNR	1.88578e-49	3.18522	0.978	0.452	2.76606e-45
NR2F2	4.82924e-46	3.09519	0.92	0.276	7.08353e-42
NRP2	6.51517e-46	2.8683	0.978	0.497	9.55646e-42
KLK6	8.31475e-41	2.52585	0.861	0.196	1.21961e-36
CCND1	5.2511e-39	2.08896	0.985	0.794	7.70232e-35
COTL1	6.99774e-37	1.40697	1	0.945	1.02643e-32
S100A10	2.91658e-35	1.54687	1	0.92	4.27803e-31
FLRT2	2.89435e-32	2.28866	0.847	0.281	4.24544e-28
SDPR	4.536e-32	2.11929	0.788	0.216	6.6534e-28
HOXD1	2.97429e-30	1.91502	0.65	0.085	4.3627e-26
PIEZO2	5.63989e-28	2.39259	0.657	0.121	8.27259e-24
PCDH17	1.02631e-26	2.0571	0.803	0.337	1.5054e-22
ETS2	6.94636e-25	1.38535	0.971	0.739	1.01889e-20
NR2F1	1.17398e-23	2.22149	0.613	0.131	1.72199e-19
ECM1	1.52464e-23	2.13543	0.584	0.101	2.23634e-19
NOSTRIN	2.89919e-23	1.57281	0.752	0.271	4.25254e-19
STON2	1.04196e-22	1.84844	0.752	0.296	1.52834e-18
SEPT6	5.02921e-22	1.31614	0.891	0.492	7.37684e-18
MAP1B	9.70605e-22	1.04184	0.993	0.874	1.42368e-17
HAPLN1	1.49105e-21	0.992291	1	0.995	2.18708e-17
SGK1	4.66272e-21	1.54548	0.905	0.618	6.83928e-17
TRIB2	6.25909e-21	1.35176	0.679	0.181	9.18083e-17
TIMP1	8.6821e-21	0.847196	1	0.96	1.27349e-16
DNM3OS	1.06174e-20	1.58025	0.599	0.146	1.55736e-16
ITGA8	2.13724e-19	1.39806	0.65	0.191	3.1349e-15
LRP5	3.14593e-19	1.46684	0.562	0.121	4.61444e-15
ADD3	3.44051e-19	1.10324	0.971	0.814	5.04654e-15
RBP1	3.72419e-19	0.719783	1	0.98	5.46265e-15
IGFBP6	4.65275e-19	2.02378	0.73	0.342	6.82466e-15
GYPC	4.82209e-19	0.980152	0.978	0.764	7.07304e-15
MAN1A1	1.00456e-18	1.52749	0.708	0.302	1.47349e-14
TMSB4X	3.63396e-18	0.58881	1	1	5.3303e-14
TOP2A	5.00191e-18	1.69939	0.905	0.724	7.3368e-14
OLFML3	5.18232e-18	1.41866	0.927	0.633	7.60143e-14
ICAM1	9.03881e-18	1.33191	0.891	0.683	1.32581e-13
UBE2C	1.1923e-17	1.6607	0.949	0.759	1.74887e-13
KANK3	1.33183e-17	1.23446	0.803	0.402	1.95353e-13
FSCN1	1.37925e-17	0.975778	1	0.99	2.02308e-13
SMAGP	2.21929e-17	1.08055	0.92	0.663	3.25525e-13
GNG2	2.53947e-17	1.1425	0.708	0.281	3.7249e-13
AKAP12	3.25433e-17	1.16834	0.905	0.598	4.77346e-13
S100P	3.73394e-17	1.74658	0.504	0.106	5.47694e-13
HAGLR	4.56826e-17	1.31929	0.445	0.065	6.70072e-13
RRM2	8.09747e-17	1.13276	0.891	0.588	1.18774e-12
TUBA1B	1.03108e-16	0.800124	1	1	1.51239e-12
NET1	1.05033e-16	0.854336	0.927	0.633	1.54062e-12
SYT1	1.35617e-16	1.91208	0.504	0.121	1.98922e-12
LEF1	1.86849e-16	1.23329	0.781	0.387	2.7407e-12
BIRC5	2.34025e-16	1.15683	0.898	0.714	3.43267e-12
RGCC	2.7084e-16	1.6874	0.562	0.176	3.97268e-12
SH3GL1	3.31198e-16	1.13982	0.92	0.704	4.85802e-12
COL13A1	3.53027e-16	1.38563	0.445	0.08	5.1782e-12
A2M	3.71845e-16	0.743848	0.912	0.598	5.45422e-12
MPP1	5.01876e-16	1.34171	0.715	0.317	7.36151e-12
MLLT11	7.9839e-16	1.03257	0.869	0.578	1.17108e-11
WFS1	1.52327e-15	1.19143	0.796	0.417	2.23433e-11
LBH	2.252e-15	0.992415	0.891	0.518	3.30324e-11
PDE2A	3.02206e-15	1.3509	0.401	0.06	4.43276e-11
TCF4	3.22899e-15	0.811945	1	0.965	4.73629e-11
MYO1B	3.56684e-15	1.05201	0.839	0.528	5.23184e-11
NR2F1-AS1	3.99787e-15	1.47346	0.336	0.025	5.86407e-11
CKS1B	4.28321e-15	1.1297	0.956	0.804	6.28261e-11
LINC01116	6.18845e-15	1.27115	0.445	0.085	9.07721e-11
LHX6	6.98743e-15	0.946836	0.38	0.05	1.02492e-10
GMFG	7.25238e-15	0.837274	0.942	0.774	1.06378e-10
EFNB1	7.27781e-15	1.40609	0.453	0.101	1.06751e-10
IL1R1	7.38822e-15	0.958317	0.343	0.03	1.0837e-10
CENPF	8.10129e-15	1.2359	0.927	0.824	1.1883e-10
FMNL2	1.20242e-14	1.0245	0.766	0.407	1.7637e-10
TLR4	1.51683e-14	1.23007	0.474	0.111	2.22489e-10
NUSAP1	1.54185e-14	1.23072	0.891	0.693	2.26158e-10
MKI67	2.22537e-14	1.32332	0.81	0.563	3.26417e-10
FOXM1	2.30387e-14	1.18505	0.686	0.322	3.37931e-10
PITPNM2	2.3779e-14	1.00319	0.314	0.02	3.4879e-10
PTTG1	2.3786e-14	1.05755	0.92	0.744	3.48894e-10
TUBB6	3.43175e-14	0.811189	0.985	0.905	5.03369e-10
SMC4	3.43656e-14	0.996891	0.956	0.824	5.04075e-10
NCAPH	3.66607e-14	1.22563	0.591	0.221	5.37739e-10
SEMA5B	3.90789e-14	1.19707	0.569	0.181	5.7321e-10
CSRNP3	4.99297e-14	1.00286	0.62	0.221	7.32369e-10
AURKB	6.12173e-14	1.25553	0.847	0.628	8.97935e-10
NT5E	6.51662e-14	0.939143	0.956	0.759	9.55858e-10
GTSE1	7.61971e-14	1.43946	0.73	0.417	1.11766e-09
DYSF	7.81182e-14	0.762743	0.978	0.869	1.14584e-09
TUBB3	8.03692e-14	0.92979	0.854	0.573	1.17886e-09
TUBB4B	8.44978e-14	0.874844	0.993	0.809	1.23941e-09
AMOTL1	9.19876e-14	0.841977	0.869	0.563	1.34927e-09
S100A6	1.03375e-13	0.840008	1	0.985	1.5163e-09
SULF2	1.2055e-13	0.842648	0.686	0.327	1.76822e-09
TK1	1.39731e-13	0.905209	0.839	0.563	2.04957e-09
APOLD1	1.54491e-13	0.671427	0.781	0.422	2.26607e-09
CDK1	2.21655e-13	1.17429	0.796	0.538	3.25124e-09
H2AFZ	2.30576e-13	0.670174	1	1	3.38209e-09
LDHA	2.51949e-13	0.73529	1	1	3.69559e-09
DLGAP5	3.00604e-13	1.3395	0.737	0.412	4.40927e-09
TPX2	3.98741e-13	1.25213	0.803	0.553	5.84874e-09
EPS8L1	4.07689e-13	1.22019	0.423	0.09	5.97998e-09
NEFM	4.69685e-13	1.97515	0.343	0.05	6.88934e-09
ST8SIA1	5.60579e-13	1.285	0.307	0.03	8.22257e-09
SLC29A1	6.66403e-13	1.06955	0.759	0.432	9.77479e-09
MT2A	7.45008e-13	1.29273	0.861	0.638	1.09278e-08
NAV3	7.8024e-13	1.1387	0.328	0.04	1.14446e-08
TBX1	8.65417e-13	1.11623	0.409	0.08	1.26939e-08
TRPS1	9.19697e-13	1.18737	0.372	0.065	1.34901e-08
UHRF1	9.46421e-13	0.895024	0.818	0.573	1.38821e-08
PON3	9.69544e-13	1.27932	0.35	0.05	1.42213e-08
MESDC1	1.00853e-12	0.859615	0.956	0.824	1.47931e-08
CTD-3080P12.3	1.12149e-12	0.877461	0.328	0.04	1.645e-08
SEMA6D	1.41916e-12	1.0902	0.504	0.171	2.08163e-08
MARCKS	1.89767e-12	0.617509	1	1	2.7835e-08
ODC1	1.97294e-12	0.887993	0.985	0.829	2.89391e-08
S1PR3	1.98184e-12	1.1383	0.416	0.101	2.90696e-08
HOTAIRM1	2.2751e-12	1.2981	0.686	0.352	3.33712e-08
CENPW	2.43293e-12	1.02712	0.905	0.784	3.56862e-08
KIT	2.6329e-12	0.964487	0.759	0.447	3.86193e-08
TFF3	2.91662e-12	1.36822	0.27	0.02	4.2781e-08
TMSB15A	3.14154e-12	0.863043	0.803	0.523	4.60801e-08
DUSP6	3.32507e-12	0.715806	0.927	0.794	4.87721e-08
TCN2	3.7141e-12	0.961244	0.745	0.452	5.44784e-08
CSRP2	3.74886e-12	0.806387	0.956	0.809	5.49883e-08
HOXD3	3.85608e-12	1.17895	0.292	0.03	5.6561e-08
CLSPN	4.56714e-12	0.960892	0.825	0.583	6.69908e-08
RAPGEF4	4.78675e-12	1.24856	0.482	0.156	7.0212e-08
MCM7	4.93199e-12	0.773357	0.971	0.92	7.23424e-08
KPNA2	6.14347e-12	0.890309	0.993	0.925	9.01124e-08
CFAP43	8.43209e-12	1.16445	0.263	0.02	1.23682e-07
CMTM3	1.02862e-11	0.812263	0.934	0.844	1.50878e-07
PRR11	1.03915e-11	0.935891	0.788	0.482	1.52423e-07
CCNB1	1.19147e-11	1.21146	0.876	0.668	1.74764e-07
PTPRN2	1.49501e-11	0.81869	0.577	0.221	2.19288e-07
IQGAP3	1.79749e-11	1.23052	0.526	0.206	2.63657e-07
CASC15	1.92242e-11	1.2664	0.292	0.035	2.8198e-07
DIXDC1	2.06671e-11	0.882934	0.679	0.342	3.03146e-07
CDC20	2.07974e-11	1.52358	0.781	0.518	3.05056e-07
CCNA2	2.16644e-11	1.07861	0.65	0.342	3.17773e-07
CDC6	2.57671e-11	0.967216	0.562	0.241	3.77951e-07
REEP1	2.67448e-11	0.858832	0.219	0.005	3.92293e-07
MXRA5	2.86877e-11	1.0489	0.219	0.005	4.20791e-07
CD200	3.12902e-11	0.688111	0.978	0.844	4.58965e-07
PDIA5	3.17021e-11	0.851847	0.774	0.477	4.65006e-07
MCM4	3.24243e-11	0.941113	0.869	0.673	4.756e-07
KIAA0101	4.07732e-11	0.982525	0.847	0.704	5.98061e-07
HMGB1	4.07852e-11	0.539585	1	1	5.98238e-07
ALDH1A2	4.1144e-11	1.38938	0.474	0.161	6.03501e-07
NFATC2	4.28292e-11	1.03024	0.343	0.065	6.28218e-07
KLF2	4.75269e-11	0.709403	0.934	0.719	6.97125e-07
ASPM	4.76505e-11	1.31721	0.701	0.457	6.98937e-07
TUBB	7.05564e-11	0.511808	1	1	1.03492e-06
ZFP36L1	8.89136e-11	0.777865	1	0.995	1.30419e-06
RRM1	9.20925e-11	0.916375	0.876	0.724	1.35081e-06
PEG10	9.28578e-11	1.30428	0.657	0.362	1.36204e-06
RBP5	9.96853e-11	0.960803	0.628	0.302	1.46218e-06
IL17RD	1.03689e-10	1.21951	0.35	0.08	1.52091e-06
KIAA1217	1.07069e-10	0.953442	0.737	0.442	1.57049e-06
DPYSL2	1.10437e-10	0.525523	1	0.99	1.6199e-06
EPHA2	1.58824e-10	0.749672	0.847	0.593	2.32964e-06
PALD1	1.66473e-10	1.04863	0.708	0.397	2.44183e-06
TUBA1A	1.76993e-10	0.490457	1	1	2.59613e-06
KITLG	1.98461e-10	1.14719	0.759	0.528	2.91102e-06
SNAI2	2.24182e-10	1.19059	0.445	0.151	3.2883e-06
HN1	2.308e-10	0.606766	1	0.985	3.38538e-06
NUF2	2.52627e-10	0.962748	0.635	0.327	3.70553e-06
HIST1H2BH	2.55101e-10	1.04622	0.715	0.452	3.74182e-06
UTRN	2.56701e-10	0.535349	1	0.905	3.76529e-06
TM4SF18	2.79625e-10	0.662749	0.92	0.754	4.10154e-06
CDKN3	2.80378e-10	1.24829	0.62	0.332	4.11258e-06
PRRT2	2.86338e-10	1.2152	0.526	0.216	4.2e-06
RARG	3.23131e-10	0.726458	0.854	0.643	4.73969e-06
SLC41A1	3.37249e-10	0.974837	0.65	0.362	4.94677e-06
GGT5	3.54321e-10	0.886914	0.35	0.08	5.19718e-06
ST8SIA4	3.58409e-10	0.914953	0.65	0.342	5.25714e-06
HIC1	3.64128e-10	1.27619	0.321	0.07	5.34103e-06
HJURP	3.82295e-10	1.32606	0.584	0.317	5.6075e-06
CCNB2	3.95488e-10	1.2175	0.774	0.583	5.80101e-06
KIF20A	4.67988e-10	0.841282	0.577	0.256	6.86445e-06
THRB	4.75315e-10	1.43093	0.35	0.09	6.97192e-06
FAM64A	4.81523e-10	1.38301	0.555	0.266	7.06298e-06
PIM3	4.97872e-10	0.921564	0.825	0.683	7.30279e-06
GINS3	5.40882e-10	1.01907	0.409	0.131	7.93365e-06
ZWINT	5.69764e-10	0.811277	0.839	0.734	8.35729e-06
DTYMK	6.65907e-10	0.689818	0.949	0.864	9.76753e-06
SYT6	7.20049e-10	1.48184	0.204	0.01	1.05617e-05
ASF1B	7.23314e-10	0.940978	0.599	0.302	1.06096e-05
ST3GAL1	7.28094e-10	0.853187	0.825	0.598	1.06797e-05
MAN2A1	7.44449e-10	0.953993	0.774	0.563	1.09196e-05
HAGLROS	8.57504e-10	1.3294	0.467	0.191	1.25779e-05
SVIL	8.90249e-10	0.735295	0.832	0.578	1.30582e-05
MYLK	9.95867e-10	0.978426	0.547	0.236	1.46074e-05
CENPU	1.02856e-09	0.726438	0.774	0.523	1.50869e-05
PEA15	1.11432e-09	0.724449	0.949	0.879	1.63449e-05
S100A16	1.1664e-09	0.499466	1	0.98	1.71088e-05
FNDC5	1.1867e-09	1.28636	0.248	0.03	1.74064e-05
RPA3	1.21445e-09	0.703077	0.949	0.809	1.78136e-05
H2AFX	1.29157e-09	0.721039	0.869	0.683	1.89447e-05
ADAMTSL2	1.36697e-09	1.40904	0.409	0.136	2.00508e-05
IRX3	1.45689e-09	1.23832	0.27	0.045	2.13697e-05
CETP	1.4618e-09	1.26472	0.263	0.04	2.14417e-05
PFKFB3	1.51451e-09	0.882354	0.796	0.543	2.22148e-05
PRC1	1.54494e-09	1.23275	0.752	0.538	2.26612e-05
COLGALT1	1.89916e-09	0.796456	0.883	0.769	2.78569e-05
FOXC1	1.95346e-09	0.931347	0.781	0.513	2.86533e-05
PCNA	1.99101e-09	0.799333	0.912	0.799	2.92042e-05
PJA1	2.03175e-09	0.796426	0.299	0.055	2.98017e-05
CARHSP1	2.11368e-09	0.63236	0.912	0.784	3.10034e-05
GPR182	2.12473e-09	1.13174	0.219	0.02	3.11655e-05
LMNB2	2.26989e-09	0.687566	0.832	0.598	3.32947e-05
GMNN	2.28985e-09	0.765259	0.883	0.769	3.35875e-05
NTS	2.32283e-09	0.860763	0.168	0	3.40713e-05
SYNE2	2.3474e-09	0.744513	0.891	0.724	3.44317e-05
C1orf61	2.46076e-09	1.51824	0.255	0.04	3.60944e-05
MAD2L1	2.5471e-09	0.710982	0.861	0.698	3.73609e-05
LIG1	2.75118e-09	0.865921	0.796	0.563	4.03542e-05
NES	2.77201e-09	0.908257	0.869	0.744	4.06599e-05
SGOL2	3.10542e-09	0.673264	0.737	0.467	4.55503e-05
CDCA4	3.42757e-09	0.826991	0.715	0.432	5.02756e-05
KALRN	3.54419e-09	0.732979	0.577	0.276	5.19861e-05
CPNE5	3.93938e-09	1.00528	0.511	0.231	5.77828e-05
VSNL1	4.45396e-09	1.33653	0.234	0.03	6.53306e-05
DEPDC1	4.94188e-09	1.34424	0.467	0.206	7.24875e-05
MCM2	4.9988e-09	0.816807	0.854	0.658	7.33225e-05
DOK4	5.09166e-09	0.753147	0.774	0.457	7.46845e-05
ANKS1A	5.26172e-09	0.593116	0.628	0.327	7.71789e-05
TLL2	5.43562e-09	0.926458	0.161	0	7.97296e-05
TTK	5.8172e-09	1.08482	0.453	0.181	8.53267e-05
ENDOD1	5.97035e-09	0.704809	0.35	0.095	8.75731e-05
GGH	6.23707e-09	0.518695	0.869	0.698	9.14853e-05
MYL6	6.74607e-09	0.349545	1	1	9.89514e-05
CRMP1	7.16123e-09	0.748455	0.912	0.774	0.000105041
UBASH3B	7.78501e-09	0.866501	0.759	0.508	0.00011419
BNIP3	9.67432e-09	0.869476	0.92	0.829	0.000141903
SPC25	1.00698e-08	0.781722	0.62	0.372	0.000147704
LRP11	1.0679e-08	0.579249	0.766	0.472	0.00015664
S100A13	1.08804e-08	0.522179	1	0.99	0.000159593
CENPH	1.11485e-08	0.664627	0.715	0.407	0.000163527
ITM2A	1.17183e-08	0.77472	0.847	0.678	0.000171883
RANGAP1	1.21911e-08	1.01506	0.737	0.508	0.000178819
JUP	1.22936e-08	0.648583	0.971	0.905	0.000180323
MCM10	1.23482e-08	1.09782	0.584	0.327	0.000181124
RCSD1	1.30345e-08	0.828799	0.701	0.432	0.00019119
CDC42EP4	1.33912e-08	0.790872	0.569	0.276	0.000196422
TRIP13	1.37291e-08	0.673616	0.62	0.332	0.000201378
NID1	1.4179e-08	0.674436	0.927	0.864	0.000207978
NDC80	1.51715e-08	1.09958	0.54	0.276	0.000222536
GPR143	1.57316e-08	0.501262	0.599	0.276	0.000230751
CKAP2L	1.92572e-08	1.0762	0.518	0.256	0.000282464
SOX11	1.97349e-08	0.548197	0.912	0.739	0.000289472
BCHE	1.99645e-08	0.769635	0.62	0.347	0.00029284
ETV4	2.02299e-08	0.784122	0.401	0.141	0.000296732
ARHGEF3	2.10396e-08	0.744682	0.891	0.724	0.000308609
STC2	2.13712e-08	0.986428	0.423	0.161	0.000313472
ESCO2	2.25756e-08	0.762294	0.496	0.226	0.00033114
PLEKHA1	2.27182e-08	0.540729	0.949	0.774	0.00033323
DYRK2	2.3281e-08	0.601702	0.693	0.412	0.000341486
PIF1	2.44294e-08	0.904603	0.27	0.055	0.000358331
SMARCA4	2.44633e-08	0.431259	1	0.95	0.000358828
KCNK6	2.49262e-08	1.06952	0.467	0.201	0.000365617
HOXB2	2.56026e-08	0.962631	0.686	0.427	0.000375539
HMMR	2.68329e-08	1.04173	0.569	0.302	0.000393585
SOBP	2.72498e-08	0.925889	0.234	0.035	0.0003997
DHFR	2.74784e-08	0.860716	0.759	0.558	0.000403053
EPB41L3	2.84503e-08	0.73256	0.547	0.266	0.000417308
SNCG	2.8574e-08	0.576923	0.92	0.754	0.000419123
SPAG5	2.93571e-08	1.12439	0.591	0.357	0.00043061
UBTD1	2.95252e-08	0.713279	0.599	0.327	0.000433075
RHNO1	2.95912e-08	0.667746	0.788	0.538	0.000434044
CSE1L	3.05372e-08	0.579892	0.942	0.854	0.00044792
ATG4A	3.11358e-08	0.902944	0.628	0.377	0.0004567
CDCA8	3.27539e-08	1.29002	0.518	0.271	0.000480434
CDT1	3.27651e-08	0.922752	0.613	0.372	0.000480599
PBK	3.29759e-08	0.847554	0.613	0.362	0.000483691
HMGN2	3.33248e-08	0.657381	0.993	0.985	0.000488808
C1orf21	3.41481e-08	0.719866	0.737	0.497	0.000500885
NR2F2-AS1	3.58577e-08	0.723637	0.204	0.025	0.000525961
MAPRE2	3.61521e-08	0.80988	0.869	0.698	0.000530279
PHF19	3.68997e-08	0.886148	0.635	0.382	0.000541244
VPS37B	3.7447e-08	0.790916	0.672	0.412	0.000549273
APLN	3.78458e-08	0.952435	0.277	0.065	0.000555122
UBE2T	3.87838e-08	0.813501	0.803	0.653	0.000568881
RAD51	4.04124e-08	0.77832	0.577	0.322	0.00059277
CENPE	4.48545e-08	0.856227	0.745	0.528	0.000657926
C21orf58	4.69377e-08	0.913829	0.599	0.327	0.000688483
MELK	4.8247e-08	0.882042	0.635	0.387	0.000707687
MAF	4.90459e-08	0.760619	0.577	0.276	0.000719405
TROAP	5.24646e-08	0.983404	0.504	0.246	0.00076955
NEK2	5.45719e-08	0.980816	0.394	0.156	0.000800461
FANCD2	5.58729e-08	0.898317	0.635	0.402	0.000819543
ARHGAP10	5.63861e-08	0.844708	0.343	0.106	0.000827071
ZNF331	5.71774e-08	0.626348	0.672	0.382	0.000838678
MME	5.73045e-08	0.939908	0.292	0.075	0.000840542
KLF4	5.77379e-08	0.513739	0.92	0.789	0.0008469
CXorf36	6.18554e-08	0.463976	0.942	0.789	0.000907295
SEMA6A	6.34367e-08	0.748592	0.847	0.749	0.00093049
IGSF1	6.50777e-08	0.643351	0.153	0.005	0.000954559
GPR19	6.81116e-08	0.721926	0.139	0	0.000999061
RGS5	6.89914e-08	0.75419	0.927	0.829	0.00101197
SPOCK1	6.90524e-08	0.879655	0.212	0.03	0.00101286
ZNF829	6.92278e-08	0.725947	0.255	0.05	0.00101543
C18orf54	7.20329e-08	0.768448	0.606	0.337	0.00105658
PROX1	7.93322e-08	1.24151	0.299	0.08	0.00116364
KIF4A	8.19951e-08	0.942103	0.584	0.332	0.0012027
FANCI	8.67901e-08	0.846148	0.664	0.447	0.00127304
C15orf26	8.70398e-08	0.691778	0.394	0.141	0.0012767
DUSP4	9.38286e-08	0.718667	0.482	0.226	0.00137628
SKA1	9.62106e-08	0.674193	0.35	0.111	0.00141122
CIT	9.68631e-08	0.770205	0.46	0.206	0.00142079
MT1X	9.77842e-08	1.14598	0.438	0.186	0.0014343
MEOX1	9.81245e-08	0.947468	0.175	0.015	0.00143929
CDCA3	1.02721e-07	1.24526	0.416	0.176	0.00150671
GINS4	1.11209e-07	0.95873	0.496	0.246	0.00163121
MYBL2	1.13084e-07	0.978672	0.526	0.281	0.00165871
CCNE1	1.16767e-07	0.920463	0.263	0.06	0.00171274
SLIT2	1.19115e-07	1.13731	0.431	0.186	0.00174717
CRNDE	1.29946e-07	0.565776	0.547	0.281	0.00190604
LINC01224	1.34934e-07	1.11753	0.416	0.171	0.0019792
PVRL1	1.35441e-07	0.671678	0.197	0.025	0.00198664
CHEK1	1.40958e-07	0.825071	0.672	0.437	0.00206757
CDCA5	1.42725e-07	0.968324	0.599	0.377	0.00209349
SSRP1	1.45339e-07	0.633908	0.956	0.915	0.00213183
SNTB1	1.49129e-07	0.72671	0.314	0.095	0.00218743
NHSL1	1.53055e-07	0.650535	0.766	0.503	0.00224501
TIMELESS	1.54883e-07	0.981493	0.672	0.482	0.00227182
SHISA6	1.56996e-07	0.746446	0.131	0	0.00230282
SEC13	1.57608e-07	0.493566	0.993	0.99	0.00231179
ARHGAP28	1.58053e-07	0.545451	0.956	0.839	0.00231832
ZSWIM6	1.61344e-07	0.544832	0.898	0.794	0.0023666
ZSCAN10	1.62374e-07	0.847418	0.197	0.025	0.0023817
LXN	1.65016e-07	0.494502	0.839	0.663	0.00242045
SCARNA22	1.69142e-07	0.476084	0.292	0.08	0.00248098
NRIP1	1.83448e-07	0.632226	0.92	0.794	0.00269081
SH3PXD2A	2.01302e-07	0.708896	0.73	0.503	0.00295269
S100A4	2.0774e-07	0.678064	0.964	0.93	0.00304712
IL32	2.13914e-07	0.993891	0.693	0.482	0.00313769
TRAF5	2.26894e-07	0.601583	0.321	0.095	0.00332809
PSAT1	2.33082e-07	0.865196	0.62	0.372	0.00341884
MLKL	2.34443e-07	0.593635	0.46	0.186	0.00343881
HOXA-AS2	2.34649e-07	0.483913	0.248	0.05	0.00344184
KIF15	2.37241e-07	0.837739	0.555	0.317	0.00347985
CDC45	2.50497e-07	0.739949	0.533	0.266	0.0036743
KIF20B	2.5474e-07	0.657503	0.788	0.583	0.00373653
EPHB3	2.55569e-07	0.977481	0.299	0.09	0.00374869
PPAP2B	2.56511e-07	0.734865	0.92	0.769	0.0037625
KIF2C	2.7402e-07	0.867571	0.613	0.392	0.00401933
KIF18A	2.75416e-07	1.00705	0.453	0.211	0.0040398
PCAT19	2.77671e-07	0.315389	0.664	0.392	0.00407287
ATAD2	2.83408e-07	0.725598	0.781	0.608	0.00415702
VAV3	2.85925e-07	0.759446	0.788	0.618	0.00419394
SNORA76C	2.88728e-07	0.509456	0.285	0.075	0.00423506
TUBA1C	2.95426e-07	0.758363	0.971	0.94	0.00433331
DEK	2.96717e-07	0.5281	0.985	0.98	0.00435224
ZGRF1	2.97788e-07	0.847418	0.467	0.216	0.00436796
DOCK4	3.13935e-07	0.667954	0.781	0.528	0.0046048
C7orf61	3.16267e-07	0.857748	0.307	0.09	0.00463901
ANP32E	3.41686e-07	0.560344	0.942	0.884	0.00501186
PLK1	3.43158e-07	1.03984	0.474	0.231	0.00503345
ST5	3.57977e-07	0.803839	0.642	0.402	0.00525081
PCDH12	3.64265e-07	0.590479	0.825	0.663	0.00534304
KIF14	4.01788e-07	1.03857	0.453	0.206	0.00589343
CHST2	4.26161e-07	0.785856	0.299	0.09	0.00625092
FXYD6	4.41391e-07	0.423232	1	0.985	0.00647433
MBNL2	4.73438e-07	0.489008	0.927	0.764	0.00694439
OAS1	4.94182e-07	0.957272	0.212	0.04	0.00724867
APCDD1	4.95573e-07	0.936888	0.263	0.065	0.00726907
SHCBP1	5.01107e-07	0.581639	0.431	0.191	0.00735023
E2F1	5.01978e-07	0.902332	0.445	0.211	0.00736301
PPM1F	5.10322e-07	0.635325	0.912	0.839	0.0074854
MAFB	5.1595e-07	0.959023	0.358	0.141	0.00756795
ACSL3	5.25869e-07	0.502425	0.949	0.814	0.00771345
RNASEH2A	5.55471e-07	0.598922	0.876	0.734	0.00814765
CASC5	5.98783e-07	0.690364	0.423	0.181	0.00878295
ORC6	5.99938e-07	0.774797	0.686	0.472	0.00879988
LOXL2	6.00145e-07	0.463796	0.942	0.899	0.00880292
ESPL1	6.0769e-07	0.883506	0.365	0.146	0.0089136
TCF19	6.14663e-07	0.848748	0.445	0.211	0.00901588
SKA3	6.16983e-07	0.903164	0.445	0.221	0.0090499
ARHGAP11A	6.33123e-07	0.731939	0.54	0.302	0.00928665
RNF157	6.35169e-07	1.07749	0.299	0.095	0.00931666
ELAVL2	6.69135e-07	0.741425	0.431	0.201	0.00981487
FZD10	6.85112e-07	0.884727	0.307	0.106	0.0100492
ZBTB39	6.98699e-07	0.939619	0.635	0.377	0.0102485
SMAD3	7.29611e-07	0.670575	0.518	0.281	0.0107019
KCNC4	7.4088e-07	0.586027	0.526	0.271	0.0108672
LOC439994	7.52135e-07	0.679221	0.606	0.382	0.0110323
KIFC3	7.76754e-07	0.910079	0.343	0.126	0.0113934
TP53I11	8.09617e-07	0.654964	0.715	0.482	0.0118755
HCFC1	8.15385e-07	0.5249	0.832	0.714	0.0119601
KIF23	8.16285e-07	1.09059	0.474	0.246	0.0119733
TRIM59	8.26532e-07	0.544486	0.628	0.352	0.0121236
HELLS	8.29039e-07	0.509029	0.876	0.754	0.0121603
VWA1	8.38959e-07	1.53069	0.299	0.101	0.0123058
STEAP1B	8.47948e-07	0.704356	0.168	0.02	0.0124377
NFIL3	8.85981e-07	0.958154	0.416	0.196	0.0129956
DHCR24	9.35129e-07	0.372259	0.912	0.744	0.0137165
KIF18B	9.54566e-07	0.92885	0.299	0.101	0.0140016
ANPEP	9.58621e-07	0.916219	0.467	0.231	0.0140611
HMGN4	9.59643e-07	0.468994	0.577	0.317	0.014076
KBTBD11	9.8045e-07	0.635688	0.226	0.05	0.0143812
RGL1	1.01161e-06	0.747529	0.796	0.603	0.0148383
ANLN	1.01497e-06	0.946477	0.496	0.271	0.0148876
CTHRC1	1.06927e-06	0.584445	0.825	0.683	0.0156841
LAMC3	1.07907e-06	0.662051	0.19	0.03	0.0158278
YWHAH	1.08717e-06	0.573076	0.927	0.839	0.0159466
HUNK	1.0985e-06	0.825663	0.19	0.03	0.0161128
HSPA12A	1.09935e-06	0.620915	0.219	0.045	0.0161253
E2F7	1.13533e-06	0.931103	0.445	0.221	0.016653
CHTF18	1.15476e-06	0.446826	0.54	0.286	0.016938
MEPCE	1.16478e-06	1.06752	0.438	0.206	0.0170851
MDC1	1.18678e-06	0.703415	0.642	0.392	0.0174077
HMGA1	1.24621e-06	0.469827	1	1	0.0182794
BZW2	1.27266e-06	0.416644	0.985	0.915	0.0186674
CENPM	1.27397e-06	0.855906	0.642	0.437	0.0186865
RTEL1	1.27492e-06	0.613275	0.263	0.07	0.0187005
RAD51AP1	1.32427e-06	0.887434	0.577	0.377	0.0194244
RNF165	1.34854e-06	0.837013	0.234	0.055	0.0197805
ARHGEF39	1.37927e-06	1.02647	0.255	0.07	0.0202311
RBMS1	1.49291e-06	0.424683	0.978	0.925	0.021898
STIM2	1.49854e-06	0.517396	0.818	0.593	0.0219805
HES6	1.5141e-06	1.00171	0.321	0.116	0.0222088
ABLIM3	1.5505e-06	0.757736	0.175	0.025	0.0227427
CYSLTR1	1.60186e-06	0.934568	0.241	0.065	0.0234961
BRCA1	1.71151e-06	0.890675	0.526	0.307	0.0251045
NPR1	1.71547e-06	0.71829	0.745	0.598	0.0251625
VAT1	1.71641e-06	0.513999	1	0.98	0.0251763
POLA2	1.72508e-06	0.840302	0.599	0.372	0.0253035
STRN4	1.72565e-06	0.636671	0.869	0.678	0.0253119
MN1	1.77722e-06	0.546314	0.336	0.121	0.0260682
S100A3	1.84553e-06	0.831326	0.219	0.05	0.0270702
CBLC	1.88584e-06	0.685821	0.109	0	0.0276614
PXN	1.90968e-06	0.313363	0.876	0.683	0.0280112
ATF3	1.92014e-06	0.776958	0.715	0.558	0.0281645
DPYSL3	1.94314e-06	0.701159	0.54	0.317	0.0285019
HOXD8	2.06797e-06	0.741049	0.182	0.03	0.030333
ING1	2.08064e-06	0.505629	0.562	0.317	0.0305188
CHAF1B	2.14899e-06	0.565289	0.358	0.141	0.0315214
SNTB2	2.17247e-06	0.681712	0.577	0.362	0.0318658
MYLK2	2.25135e-06	0.411643	0.175	0.025	0.0330229
MIS18BP1	2.26594e-06	0.498702	0.985	0.925	0.0332367
IL16	2.31954e-06	0.745102	0.562	0.337	0.0340229
LPIN1	2.36422e-06	0.735345	0.54	0.322	0.0346783
MRPL14	2.38281e-06	0.582765	0.891	0.769	0.0349511
DIAPH3	2.42146e-06	0.803374	0.46	0.236	0.0355179
CTSL	2.48083e-06	0.49047	0.898	0.789	0.0363888
WHSC1	2.56556e-06	0.568648	0.861	0.774	0.0376317
CHRM3	2.59307e-06	0.760475	0.292	0.095	0.0380352
BUB1	2.59385e-06	0.773868	0.599	0.372	0.0380466
ANXA2	2.63574e-06	0.344709	0.993	0.98	0.038661
SNN	2.64056e-06	0.662753	0.628	0.372	0.0387318
HPCAL1	2.68785e-06	0.65197	0.657	0.457	0.0394253
HMGB3	2.7514e-06	0.474614	0.964	0.92	0.0403575
CENPV	2.79517e-06	0.914921	0.562	0.382	0.0409995
P3H2	2.79588e-06	0.839041	0.241	0.065	0.0410099
ARHGEF15	2.9566e-06	0.478103	0.942	0.824	0.0433675
TACC3	2.97214e-06	0.807939	0.737	0.608	0.0435954
ACAT2	3.03207e-06	0.497548	0.737	0.513	0.0444745
HOXD4	3.03741e-06	0.675222	0.146	0.015	0.0445527
BAALC	3.07324e-06	0.677581	0.65	0.462	0.0450783
MAP3K1	3.07822e-06	0.563842	0.54	0.286	0.0451513
LOC400043	3.11675e-06	0.602963	0.321	0.116	0.0457166
GAS2L3	3.14167e-06	0.877571	0.358	0.156	0.046082
UQCC2	3.14215e-06	0.491593	0.978	0.93	0.046089
GRAP2	3.1786e-06	0.945955	0.146	0.015	0.0466238
HMGN5	3.18742e-06	0.427534	0.839	0.638	0.0467531
MAP1S	3.38274e-06	0.684313	0.664	0.442	0.049618
ADAM15	3.39556e-06	0.702901	0.861	0.704	0.049806
CXCR41	2.52178e-11	1.22505	1	0.805	3.69895e-07
PDLIM11	1.47071e-09	0.825273	1	0.842	2.15724e-05
L1TD1	5.44807e-09	1.73693	0.316	0.05	7.99122e-05
SEPW1	2.7065e-08	0.545799	1	0.997	0.000396989
KIF5B	3.57125e-08	0.641634	1	0.99	0.00052383
SEC14L1	4.22986e-08	0.851933	0.974	0.896	0.000620436
NNAT1	5.36454e-08	0.777766	1	0.993	0.000786871
ADM	9.84379e-08	0.816465	0.974	0.916	0.00144389
APOL1	1.01003e-07	0.994797	0.211	0.023	0.00148151
CD248	1.29049e-07	1.21776	0.632	0.265	0.00189288
OSBPL3	1.3732e-07	1.42117	0.368	0.081	0.0020142
ELOVL7	1.59781e-07	0.396002	0.211	0.023	0.00234367
PREX21	1.77839e-07	0.935101	0.921	0.581	0.00260854
TUBB2A	2.88499e-07	1.21774	0.921	0.728	0.0042317
AHNAK	3.40647e-07	1.41238	0.711	0.473	0.00499661
TTC41P	3.53156e-07	0.433262	0.132	0.007	0.00518009
STMN1	3.6265e-07	0.41782	1	1	0.00531935
UBE2J1	3.96641e-07	0.651082	1	0.977	0.00581794
ELOVL4	4.26413e-07	0.312772	0.132	0.007	0.00625463
B3GNT21	4.28544e-07	0.753395	1	0.889	0.00628589
DEPTOR1	5.65854e-07	1.06658	0.658	0.312	0.00829995
APLP2	7.40077e-07	0.479474	1	0.993	0.0108555
MYL9	9.9439e-07	1.01416	0.763	0.416	0.0145857
PDGFB	1.01889e-06	0.800531	1	0.826	0.0149451
CD991	1.23259e-06	0.533406	1	0.963	0.0180796
NGFRAP1	1.24021e-06	0.398858	1	1	0.0181914
SLFN13	1.43245e-06	0.896357	0.368	0.097	0.0210112
ITGB1	1.47476e-06	0.532777	1	1	0.0216319
CEP112	1.52136e-06	1.04463	0.789	0.477	0.0223152
GJA1	1.57867e-06	0.843078	0.974	0.829	0.023156
PTRF	1.60747e-06	0.788963	1	0.943	0.0235784
GP9	2.39427e-06	0.602977	0.316	0.07	0.0351191
ARPC2	2.42483e-06	0.487032	1	1	0.0355674
LY6G5C	2.53589e-06	0.724223	0.5	0.171	0.0371964
MTRF1L	2.6306e-06	0.712344	0.895	0.651	0.0385857
TUBB61	2.70378e-06	0.603696	1	0.93	0.0396591
SIPA1L2	2.77124e-06	0.949238	0.868	0.721	0.0406486
COL6A2	2.98237e-06	0.544404	1	0.943	0.0437453
GSN	3.15399e-06	0.832303	0.974	0.889	0.0462628
LOC101928673	3.37416e-06	0.676508	0.132	0.01	0.0494922

## Sheet: gRNA enrichement
gRNA enrichment analysis - arterial cells iSAM_AGM+DOX vs iSAM_AGM-DOX
target gRNA	p_val	avg_log2FC	pct.1	pct.2	p_val_adj	cluster	gene
RUNX1T1-gRNA	4.113568e-08	23.6747	0.522	0.340	0.411357	Arterial	RUNX1T1
TFDP2-gRNA	1.009104e-03	7.03725	0.330	0.219	10091	Arterial	TFDP2
NR4A1-gRNA	1.127484e-03	5.10276	0.254	0.160	11274.8	Arterial	NR4A1
